# Supplementary material for: B(C6F5)3-catalyzed β-C(sp3)–H alkylation of tertiary amines with 2-aryl-3H-indol-3-ones
Source: Royal Society of Chemistry journal article supplement (doi:10.1039/d3ob00481c), 2023-01-01

## Supporting Information

### **B(C<sub>6</sub>F<sub>5</sub>)<sub>3</sub>-Catalyzed $\beta$ -C(sp<sup>3</sup>)-H alkylation of tertiary amines with 2-Aryl-3*H*-indol-3-ones**

Chang-Peng Zou, Tao Ma, Xiu-Xiu Qiao, Xi-Xi Wu, Ganpeng Li,

Yonghui He\*, and Xiao-Jing Zhao\*<sup>[a]</sup>

Key Laboratory of Chemistry in Ethnic Medicinal Resources, Key Laboratory of Natural Products Synthetic Biology of Ethnic Medicinal Endophytes, State Ethnic Affairs Commission & Ministry of Education, School of Ethnic Medicine, Yunnan Minzu University, Kunming, 650500, China

E-mail: heyonghui@ymu.edu.cn, zhaoxj@ymu.edu.cn

## Table of Contents

|                                                                     |    |
|---------------------------------------------------------------------|----|
| 1. General information .....                                        | 2  |
| 2. General procedure for the synthesis of products .....            | 3  |
| 3. Gram-scale experiments and transformations of the products ..... | 13 |
| 4. References .....                                                 | 14 |
| 5. Copies of NMR spectra.....                                       | 14 |

## 1. General information

All reactions were performed using oven-dried or flame-dried glassware equipped with a magnetic stir bar before used.

All reagents were purchased from commercial suppliers and used without further purification. All solvents were purified by standard operating method.

Thin-layer chromatography was performed with EMD silica gel 60 GF<sub>254</sub> plates eluting with solvents indicated, visualized by a 254 nm UV lamp and stained with phosphomolybdic acid (PMA). **<sup>1</sup>H NMR**, **<sup>13</sup>C NMR** and **<sup>19</sup>F NMR** spectra were obtained on Bruker AM-400, Chemical shifts were denoted in ppm ( $\delta$ ), and calibrated by using residual undeuterated solvent CDCl<sub>3</sub> (7.26 ppm), tetramethylsilane (0.00 ppm) as internal reference for <sup>1</sup>H NMR and the deuterated solvent CDCl<sub>3</sub> (77.00 ppm) tetramethylsilane (0.00 ppm) as internal standard for <sup>13</sup>C NMR; solvent *d*<sub>6</sub>-DMSO (2.50 ppm), tetramethylsilane (0.00 ppm) as internal reference for <sup>1</sup>H NMR and the deuterated solvent DMSO-*d*<sub>6</sub> (39.50 ppm) tetramethylsilane (0.00 ppm) as internal standard for <sup>13</sup>C NMR multiplicities are as indicated: s = singlet, d = doublet, t = triplet, q = quartet, m = multiplet. **High-resolution mass spectral analysis (HRMS) data** was measured on a Bruker impact II (Q-TOF) mass spectrum by means of the ESI technique.

The 2-aryl indoles <sup>[1]</sup> and 2-aryl substituted 3*H*-indol-3-ones **1** were prepared according to the reported procedures. <sup>[2]</sup>

## 2. General procedure for the synthesis of products

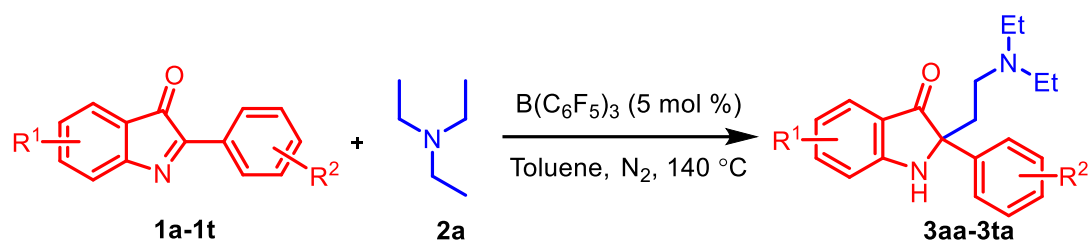

General procedure for the preparation of **3aa-3ta**: Unless otherwise noted, reactions were performed: Cat.  $B(C_6F_5)_3$  (5 mol%), **1** (0.10 mmol), **2** (0.50 mmol) were added to **toluene** (1.0 mL) under  $N_2$  atmosphere at  $140\text{ }^\circ\text{C}$ . Then stirred for 8-72 h. The resulting mixture was concentrated under vacuum, the crude product was purified by flash column chromatography using ethyl acetate/ petroleum ether/ triethylamine to give the title compound **3aa-3ta**.

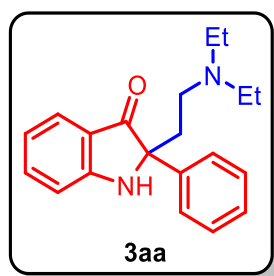

**2-(2-(diethylamino)ethyl)-2-phenylindolin-3-one (3aa)** According to the general procedure, **3aa** was obtained using 2-phenyl-3H-indol-3-one **1a** (20.7 mg, 0.1 mmol) and triethylamine **2a** (50.6 mg, 0.5 mmol) in 72% yield (22.2 mg) as a yellow oily (silica gel flash chromatography: ethyl acetate :petroleum ether :triethylamine = 2:100:1).

$R_f$  = 0.30 (ethyl acetate: petroleum ether: triethylamine = 2:100:1).

$^1\text{H NMR}$  (400 MHz,  $DMSO-d_6$ )  $\delta$  7.96 (s, 1H), 7.52 (d,  $J$  = 7.9 Hz, 2H), 7.46 (t,  $J$  = 7.6 Hz, 1H), 7.33 (t,  $J$  = 7.8 Hz, 3H), 7.25 (t,  $J$  = 7.2 Hz, 1H), 6.99 (d,  $J$  = 8.3 Hz, 1H), 6.68 (t,  $J$  = 7.4 Hz, 1H), 2.43 – 2.21 (m, 6H), 2.20 – 2.13 (m, 1H), 2.10 – 2.02 (m, 1H), 0.80 (t,  $J$  = 7.1 Hz, 6H).

$^{13}\text{C NMR}$  (100 MHz,  $DMSO-d_6$ )  $\delta$  200.8, 160.8, 139.7, 137.1, 128.3, 127.2, 125.5, 124.2, 118.1, 117.2, 111.6, 70.4, 47.6, 46.0, 35.0, 11.4.

**HRMS** (ESI)  $m/z$  calcd. for  $C_{20}H_{25}N_2O$  ( $M+H$ ) $^+$ : 309.1962, found 309.1965.

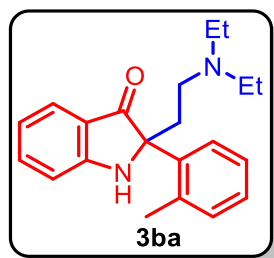

**2-(2-(diethylamino)ethyl)-2-(o-tolyl)indolin-3-one (3ba)** According to the general procedure, **3ba** was obtained using 2-(o-tolyl)-3H-indol-3-one **1b** (22.1 mg, 0.1 mmol) and triethylamine **2a** (50.6 mg, 0.5 mmol) in 43% yield (13.8 mg) as a yellow oily (silica gel flash chromatography: ethyl acetate :petroleum ether :triethylamine = 2:100:1).

$R_f$  = 0.30 (ethyl acetate: petroleum ether: triethylamine = 2:100:1).

$^1\text{H NMR}$  (400 MHz,  $DMSO-d_6$ )  $\delta$  7.76 (s, 1H), 7.55 – 7.40 (m, 3H), 7.20 – 7.16 (m, 2H), 7.11 (d,

$J = 5.5$  Hz, 1H), 6.91 (d,  $J = 8.2$  Hz, 1H), 6.72 (t,  $J = 7.3$  Hz, 1H), 2.39 – 2.25 (m, 6H), 2.18 – 2.14 (m, 1H), 2.08 (s, 3H), 1.86 (d,  $J = 21.2$  Hz, 1H), 0.83 (t,  $J = 7.0$  Hz, 6H).

$^{13}\text{C NMR}$  (100 MHz, DMSO- $d_6$ )  $\delta$  202.6, 160.4, 137.8, 137.3, 137.0, 132.1, 127.7, 127.5, 125.8, 123.7, 119.9, 117.5, 111.9, 70.9, 47.1, 46.2, 34.3, 20.9, 11.6.

**HRMS** (ESI)  $m/z$  calcd. for  $\text{C}_{21}\text{H}_{27}\text{N}_2\text{O}$  ( $\text{M}+\text{H}$ ) $^+$ : 323.2118, found 323.2117.

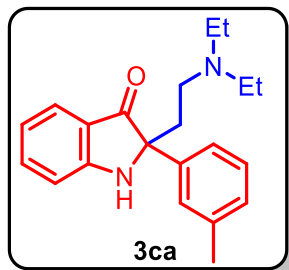

**2-(2-(diethylamino)ethyl)-2-(m-tolyl)indolin-3-one (3ca)** According to the general procedure, **3ca** was obtained using 2-(m-tolyl)-3H-indol-3-one **1c** (22.1 mg, 0.1 mmol) and triethylamine **2a** (50.6 mg, 0.5 mmol) in 83% yield (26.7 mg) as a yellow oily (silica gel flash chromatography: ethyl acetate :petroleum ether :triethylamine = 2:100:1).

$R_f = 0.30$  (ethyl acetate: petroleum ether: triethylamine = 2:100:1).

$^1\text{H NMR}$  (400 MHz, DMSO- $d_6$ )  $\delta$  7.93 (s, 1H), 7.47 – 7.43 (m, 1H), 7.32 (t,  $J = 9.8$  Hz, 3H), 7.21 (t,  $J = 7.6$  Hz, 1H), 7.06 (d,  $J = 7.4$  Hz, 1H), 6.98 (d,  $J = 8.3$  Hz, 1H), 6.70 – 6.64 (m, 1H), 2.41 – 2.32 (m, 3H), 2.28 (s, 3H), 2.27 – 2.19 (m, 3H), 2.18 – 2.10 (m, 1H), 2.07 – 1.99 (m, 1H), 0.79 (t,  $J = 7.1$  Hz, 6H).

$^{13}\text{C NMR}$  (100 MHz, DMSO- $d_6$ )  $\delta$  200.9, 160.8, 139.6, 137.3, 137.1, 128.2, 127.8, 126.0, 124.2, 122.7, 118.2, 117.2, 111.6, 70.4, 47.6, 46.0, 35.1, 21.2, 11.5.

**HRMS** (ESI)  $m/z$  calcd. for  $\text{C}_{21}\text{H}_{27}\text{N}_2\text{O}$  ( $\text{M}+\text{H}$ ) $^+$ : 323.2118, found 323.2117.

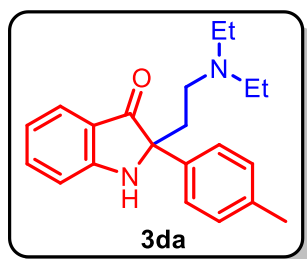

**2-(2-(diethylamino)ethyl)-2-(p-tolyl)indolin-3-one (3da)** According to the general procedure, **3da** was obtained using 2-(p-tolyl)-3H-indol-3-one **1d** (22.1 mg, 0.1 mmol) and triethylamine **2a** (50.6 mg, 0.5 mmol) in 71% yield (22.8 mg) as a yellow oily (silica gel flash chromatography: ethyl acetate :petroleum ether :triethylamine = 2:100:1).

$R_f = 0.30$  (ethyl acetate: petroleum ether: triethylamine = 2:100:1).

$^1\text{H NMR}$  (400 MHz, DMSO- $d_6$ )  $\delta$  7.92 (s, 1H), 7.44 (t,  $J = 7.7$  Hz, 1H), 7.39 (d,  $J = 8.1$  Hz, 2H), 7.33 (d,  $J = 7.7$  Hz, 1H), 7.13 (d,  $J = 8.1$  Hz, 2H), 6.97 (d,  $J = 8.3$  Hz, 1H), 6.67 (t,  $J = 7.4$  Hz, 1H), 2.42 – 2.33 (m, 3H), 2.31 – 2.19 (m, 6H), 2.16 – 2.09 (m, 1H), 2.08 – 1.99 (m, 1H), 0.80 (t,  $J = 7.1$  Hz, 6H).

$^{13}\text{C NMR}$  (100 MHz, DMSO- $d_6$ )  $\delta$  201.0, 160.8, 137.1, 136.6, 136.3, 128.9, 125.5, 124.2, 118.2, 117.2, 111.6, 70.3, 47.6, 46.0, 35.0, 20.5, 11.5.

**HRMS** (ESI)  $m/z$  calcd. for  $\text{C}_{21}\text{H}_{27}\text{N}_2\text{O}$  ( $\text{M}+\text{H}$ ) $^+$ : 323.2118, found 323.2121.

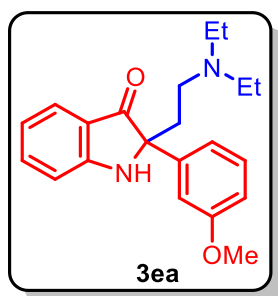

**2-(2-(diethylamino)ethyl)-2-(3-methoxyphenyl)indolin-3-one (3ea)** According to the general procedure, **3ea** was obtained using 2-(3-methoxyphenyl)-3H-indol-3-one **1e** (23.7 mg, 0.1 mmol) and triethylamine **2a** (50.6 mg, 0.5 mmol) in 89% yield (30.1 mg) as a yellow oily (silica gel flash chromatography: ethyl acetate :petroleum ether :triethylamine = 2:100:1).

$R_f$  = 0.30 (ethyl acetate: petroleum ether: triethylamine = 2:100:1).

**$^1\text{H NMR}$**  (400 MHz, DMSO- $d_6$ )  $\delta$  7.95 (s, 1H), 7.49 – 7.42 (m, 1H), 7.34 (d,  $J$  = 7.6 Hz, 1H), 7.25 (t,  $J$  = 8.0 Hz, 1H), 7.10 (d,  $J$  = 8.4 Hz, 1H), 7.07 – 7.04 (m, 1H), 6.98 (d,  $J$  = 8.3 Hz, 1H), 6.84 (dd,  $J$  = 7.9, 2.3 Hz, 1H), 6.68 (t,  $J$  = 7.3 Hz, 1H), 3.72 (s, 3H), 2.43 – 2.32 (m, 3H), 2.30 – 2.19 (m, 3H), 2.16 – 2.00 (m, 2H), 0.80 (t,  $J$  = 7.1 Hz, 6H).

**$^{13}\text{C NMR}$**  (100 MHz, DMSO- $d_6$ )  $\delta$  200.6, 160.7, 159.2, 141.3, 137.1, 129.4, 124.2, 118.2, 117.8, 117.3, 112.1, 111.8, 111.6, 70.4, 55.0, 47.6, 46.0, 35.2, 11.4.

**HRMS** (ESI)  $m/z$  calcd. for  $\text{C}_{21}\text{H}_{27}\text{N}_2\text{O}_2$  ( $\text{M}+\text{H}$ ) $^+$ : 339.2067, found 339.2067.

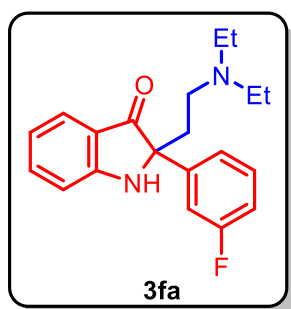

**2-(2-(diethylamino)ethyl)-2-(3-fluorophenyl)indolin-3-one (3fa)** According to the general procedure, **3fa** was obtained using 2-(3-fluorophenyl)-3H-indol-3-one **1f** (22.5 mg, 0.1 mmol) and triethylamine **2a** (50.6 mg, 0.5 mmol) in 60% yield (19.5 mg) as a yellow oily (silica gel flash chromatography: ethyl acetate :petroleum ether :triethylamine = 2:100:1).

$R_f$  = 0.30 (ethyl acetate: petroleum ether: triethylamine = 2:100:1).

**$^1\text{H NMR}$**  (400 MHz, DMSO- $d_6$ )  $\delta$  7.99 (s, 1H), 7.49 – 7.45 (m, 1H), 7.41 – 7.34 (m, 3H), 7.33 – 7.28 (m, 1H), 7.15 – 7.06 (m, 1H), 7.00 (d,  $J$  = 8.3 Hz, 1H), 6.70 (t,  $J$  = 7.4 Hz, 1H), 2.44 – 2.31 (m, 3H), 2.28 – 2.20 (m, 3H), 2.19 – 2.13 (m, 1H), 2.00 – 2.07 (m, 1H), 0.78 (t,  $J$  = 7.1 Hz, 6H).

**$^{13}\text{C NMR}$**  (100 MHz, DMSO- $d_6$ )  $\delta$  200.2, 162.2 (d,  $J$  = 242.0 Hz), 160.7, 142.9 (d,  $J$  = 7.0 Hz), 137.3, 130.3 (d,  $J$  = 8.0 Hz), 124.3, 121.7 (d,  $J$  = 2.0 Hz), 118.1, 117.5, 114.0 (d,  $J$  = 21.0 Hz), 112.5 (d,  $J$  = 23.0 Hz), 111.8, 70.2 (d,  $J$  = 2.0 Hz), 47.6, 45.9, 35.4, 11.3.

**$^{19}\text{F NMR}$**  (376 MHz, DMSO- $d_6$ )  $\delta$  -113.0.

**HRMS** (ESI)  $m/z$  calcd. for  $\text{C}_{20}\text{H}_{24}\text{FN}_2\text{O}$  ( $\text{M}+\text{H}$ ) $^+$ : 327.1867, found 327.1868.

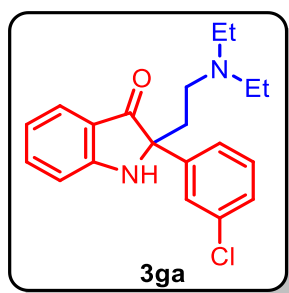

**2-(3-chlorophenyl)-2-(2-(diethylamino)ethyl)indolin-3-one (3ga)** According to the general procedure, **3ga** was obtained using 2-(3-chlorophenyl)-3H-indol-3-one **1g** (24.1 mg, 0.1 mmol) and triethylamine **2a** (50.6 mg, 0.5 mmol) in 50% yield (17.1 mg) as a yellow oily (silica gel flash chromatography: ethyl acetate :petroleum ether :triethylamine = 2:100:1).

$R_f$  = 0.30 (ethyl acetate: petroleum ether: triethylamine = 2:100:1).

**$^1\text{H NMR}$**  (400 MHz,  $\text{DMSO-}d_6$ )  $\delta$  8.01 (s, 1H), 7.54 – 7.50 (m, 2H), 7.49 – 7.44 (m, 1H), 7.40 – 7.31 (m, 3H), 7.00 (d,  $J$  = 8.3 Hz, 1H), 6.70 (t,  $J$  = 7.3 Hz, 1H), 2.42 – 2.31 (m, 3H), 2.26 – 2.19 (m, 3H), 2.18 – 2.14 (m, 1H), 2.07 – 1.97 (m, 1H), 0.77 (t,  $J$  = 7.1 Hz, 6H).

**$^{13}\text{C NMR}$**  (100 MHz,  $\text{DMSO-}d_6$ )  $\delta$  200.3, 160.8, 142.5, 137.4, 133.2, 130.4, 127.3, 125.4, 124.5, 124.4, 118.1, 117.7, 111.9, 70.1, 47.6, 45.9, 35.3, 11.4.

**HRMS** (ESI)  $m/z$  calcd. for  $\text{C}_{20}\text{H}_{24}\text{ClN}_2\text{O}$  ( $\text{M}+\text{H}$ ) $^+$ : 343.1572, found 343.1570.

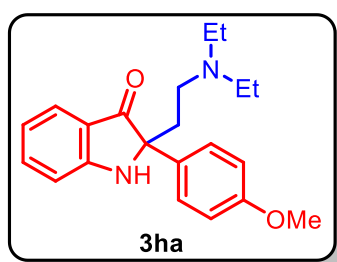

**2-(2-(diethylamino)ethyl)-2-(4-methoxyphenyl)indolin-3-one (3ha)** According to the general procedure, **3ha** was obtained using 2-(4-methoxyphenyl)-3H-indol-3-one **1h** (23.7 mg, 0.1 mmol) and triethylamine **2a** (50.6 mg, 0.5 mmol) in 66% yield (22.3 mg) as a yellow oily (silica gel flash chromatography: ethyl acetate :petroleum ether :triethylamine = 2:100:1).

$R_f$  = 0.30 (ethyl acetate: petroleum ether: triethylamine = 2:100:1).

**$^1\text{H NMR}$**  (400 MHz,  $\text{DMSO-}d_6$ )  $\delta$  7.90 (s, 1H), 7.47 – 7.39 (m, 3H), 7.34 (d,  $J$  = 7.6 Hz, 1H), 6.97 (d,  $J$  = 8.3 Hz, 1H), 6.91 – 6.84 (m, 2H), 6.70 – 6.64 (m, 1H), 3.71 (s, 3H), 2.42 – 2.33 (m, 3H), 2.30 – 2.20 (m, 3H), 2.13 – 2.07 (m, 1H), 2.05 – 1.98 (m, 1H), 0.80 (t,  $J$  = 7.1 Hz, 6H).

**$^{13}\text{C NMR}$**  (100 MHz,  $\text{DMSO-}d_6$ )  $\delta$  201.2, 160.8, 158.5, 137.1, 131.4, 126.7, 124.3, 118.2, 117.2, 113.7, 111.6, 70.0, 55.0, 47.6, 46.0, 35.0, 11.5.

**HRMS** (ESI)  $m/z$  calcd. for  $\text{C}_{21}\text{H}_{27}\text{N}_2\text{O}_2$  ( $\text{M}+\text{H}$ ) $^+$ : 339.2067, found 339.2067.

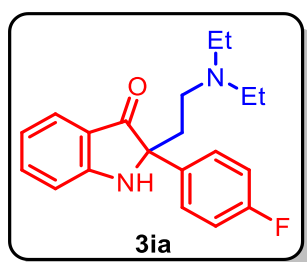

**2-(2-(diethylamino)ethyl)-2-(4-fluorophenyl)indolin-3-one (3ia)** According to the general procedure, **3ia** was obtained using 2-(4-fluorophenyl)-3H-indol-3-one **1i** (22.5 mg, 0.1 mmol) and triethylamine **2a** (50.6 mg, 0.5 mmol) in 42% yield (13.7 mg) as a yellow oily (silica gel flash chromatography: ethyl acetate :petroleum ether :triethylamine = 2:100:1).

$R_f$  = 0.30 (ethyl acetate: petroleum ether: triethylamine = 2:100:1).

$^1\text{H NMR}$  (400 MHz, DMSO- $d_6$ )  $\delta$  7.98 (s, 1H), 7.57 – 7.53 (m, 2H), 7.48 – 7.42 (m, 1H), 7.35 (d,  $J$  = 7.7 Hz, 1H), 7.20 – 7.13 (m, 2H), 6.98 (d,  $J$  = 8.3 Hz, 1H), 6.69 (t,  $J$  = 7.4 Hz, 1H), 2.40 – 2.32 (m, 3H), 2.28 – 2.19 (m, 3H), 2.19 – 2.11 (m, 1H), 2.06 – 1.98 (m, 1H), 0.78 (t,  $J$  = 7.1 Hz, 6H).

$^{13}\text{C NMR}$  (100 MHz, DMSO- $d_6$ )  $\delta$  200.8, 161.5 (d,  $J$  = 242.0 Hz), 160.7, 137.2, 135.9 (d,  $J$  = 3.0 Hz), 127.6 (d,  $J$  = 8.0 Hz), 124.3, 118.1, 117.4, 115.1 (d,  $J$  = 21.0 Hz), 111.7, 70.0, 47.6, 46.0, 35.3, 11.4.

$^{19}\text{F NMR}$  (376 MHz, DMSO- $d_6$ )  $\delta$  -115.9.

**HRMS** (ESI)  $m/z$  calcd. for  $\text{C}_{20}\text{H}_{24}\text{FN}_2\text{O}$  ( $\text{M}+\text{H}$ ) $^+$ : 327.1867, found 327.1868.

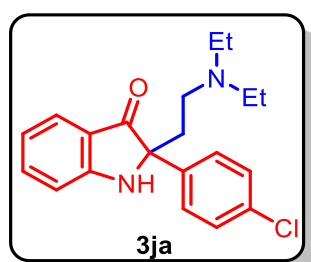

**2-(4-chlorophenyl)-2-(2-(diethylamino)ethyl)indolin-3-one (3ja)** According to the general procedure, **3ja** was obtained using 2-(4-chlorophenyl)-3H-indol-3-one **1j** (24.1 mg, 0.1 mmol) and triethylamine **2a** (50.6 mg, 0.5 mmol) in 30% yield (10.3 mg) as a yellow oily (silica gel flash chromatography: ethyl acetate :petroleum ether :triethylamine = 2:100:1).

$R_f$  = 0.30 (ethyl acetate: petroleum ether: triethylamine = 2:100:1).

$^1\text{H NMR}$  (400 MHz, DMSO- $d_6$ )  $\delta$  8.00 (s, 1H), 7.56 – 7.50 (m, 2H), 7.50 – 7.43 (m, 1H), 7.43 – 7.37 (m, 2H), 7.35 (d,  $J$  = 7.6 Hz, 1H), 6.99 (d,  $J$  = 8.3 Hz, 1H), 6.69 (t,  $J$  = 7.4 Hz, 1H), 2.41 – 2.31 (m, 3H), 2.27 – 2.19 (m, 3H), 2.19 – 2.10 (m, 1H), 2.05 – 1.98 (m, 1H), 0.78 (t,  $J$  = 7.1 Hz, 6H).

$^{13}\text{C NMR}$  (100 MHz, DMSO- $d_6$ )  $\delta$  200.6, 160.9, 138.9, 137.4, 132.1, 128.4, 127.6, 124.4, 118.1, 117.6, 111.9, 70.1, 47.7, 46.0, 35.1, 11.4.

**HRMS** (ESI)  $m/z$  calcd. for  $\text{C}_{20}\text{H}_{24}\text{ClN}_2\text{O}$  ( $\text{M}+\text{H}$ ) $^+$ : 343.1572, found 343.1576.

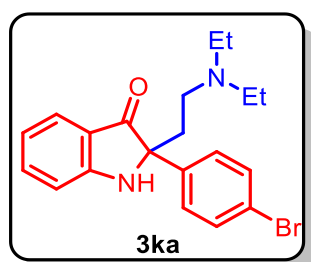

**2-(4-bromophenyl)-2-(2-(diethylamino)ethyl)indolin-3-one (3ka)** According to the general procedure, **3ka** was obtained using 2-(4-bromophenyl)-3H-indol-3-one **1k** (27.2 mg, 0.1 mmol) and triethylamine **2a** (50.6 mg, 0.5 mmol) in 53% yield (20.4 mg) as a yellow oily (silica gel flash chromatography: ethyl acetate :petroleum ether :triethylamine = 2:100:1).

$R_f$  = 0.30 (ethyl acetate: petroleum ether: triethylamine = 2:100:1).

$^1\text{H NMR}$  (400 MHz, DMSO- $d_6$ )  $\delta$  7.99 (s, 1H), 7.54 (d,  $J$  = 8.7 Hz, 2H), 7.49 – 7.44 (m, 3H), 7.35



(d,  $J = 7.6$  Hz, 1H), 6.99 (d,  $J = 8.3$  Hz, 1H), 6.69 (t,  $J = 7.4$  Hz, 1H), 2.41 – 2.32 (m, 3H), 2.28 – 2.20 (m, 3H), 2.19 – 2.11 (m, 1H), 2.06 – 1.99 (m, 1H), 0.78 (t,  $J = 7.1$  Hz, 6H).

$^{13}\text{C}$  NMR (100 MHz, DMSO- $d_6$ )  $\delta$  200.4, 160.8, 139.3, 137.3, 131.2, 127.9, 124.3, 120.6, 118.1, 117.5, 111.8, 70.1, 47.6, 45.9, 35.1, 11.3.

HRMS (ESI)  $m/z$  calcd. for  $\text{C}_{20}\text{H}_{24}\text{BrN}_2\text{O}$  ( $\text{M}+\text{H}$ ) $^+$ : 387.1067, found 387.1065.

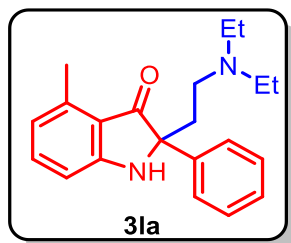

**2-(2-(diethylamino)ethyl)-4-methyl-2-phenylindolin-3-one (3la)** According to the general procedure, **3la** was obtained using 4-methyl-2-phenyl-3H-indol-3-one **II** (22.1 mg, 0.1 mmol) and triethylamine **2a** (50.6 mg, 0.5 mmol) in 80% yield (25.7 mg) as a yellow oily (silica gel flash chromatography: ethyl acetate :petroleum ether :triethylamine = 2:100:1).

$R_f = 0.30$  (ethyl acetate: petroleum ether: triethylamine = 2:100:1).

$^1\text{H}$  NMR (400 MHz, DMSO- $d_6$ )  $\delta$  7.87 (s, 1H), 7.53 – 7.48 (m, 2H), 7.35 – 7.29 (m, 3H), 7.27 – 7.23 (m, 1H), 6.78 (d,  $J = 8.2$  Hz, 1H), 6.42 (d,  $J = 7.2$  Hz, 1H), 2.43 – 2.33 (m, 6H), 2.28 – 2.19 (m, 3H), 2.18 – 2.10 (m, 1H), 2.07 – 2.00 (m, 1H), 0.80 (t,  $J = 7.1$  Hz, 6H).

$^{13}\text{C}$  NMR (100 MHz, DMSO- $d_6$ )  $\delta$  201.4, 161.3, 140.0, 138.7, 136.5, 128.3, 127.1, 125.6, 118.5, 116.0, 108.9, 70.2, 47.7, 46.0, 35.1, 17.6, 11.5.

HRMS (ESI)  $m/z$  calcd. for  $\text{C}_{21}\text{H}_{27}\text{N}_2\text{O}$  ( $\text{M}+\text{H}$ ) $^+$ : 323.2118, found 323.2115.

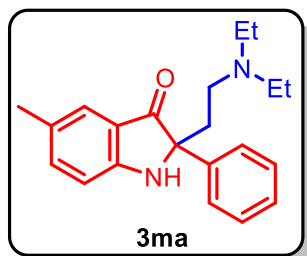

**2-(2-(diethylamino)ethyl)-5-methyl-2-phenylindolin-3-one (3ma)** According to the general procedure, **3ma** was obtained using 5-methyl-2-phenyl-3H-indol-3-one **1m** (22.1 mg, 0.1 mmol) and triethylamine **2a** (50.6 mg, 0.5 mmol) in 70% yield (22.5 mg) as a yellow oily (silica gel flash chromatography: ethyl acetate :petroleum ether :triethylamine = 2:100:1).

$R_f = 0.30$  (ethyl acetate: petroleum ether: triethylamine = 2:100:1).

$^1\text{H}$  NMR (400 MHz, DMSO- $d_6$ )  $\delta$  7.77 (s, 1H), 7.50 (d,  $J = 7.3$  Hz, 2H), 7.34 – 7.29 (m, 3H), 7.24 (t,  $J = 7.2$  Hz, 1H), 7.14 (s, 1H), 6.92 (d,  $J = 8.3$  Hz, 1H), 2.40 – 2.32 (m, 3H), 2.30 – 2.21 (m, 3H), 2.19 (s, 3H), 2.15 – 2.02 (m, 2H), 0.81 (t,  $J = 7.1$  Hz, 6H).

$^{13}\text{C}$  NMR (100 MHz, DMSO- $d_6$ )  $\delta$  200.9, 159.5, 139.8, 138.6, 128.3, 127.1, 126.2, 125.6, 123.5, 118.2, 111.7, 70.8, 47.6, 46.1, 35.0, 20.0, 11.6.

HRMS (ESI)  $m/z$  calcd. for  $\text{C}_{21}\text{H}_{27}\text{N}_2\text{O}$  ( $\text{M}+\text{H}$ ) $^+$ : 323.2118, found 323.2114.

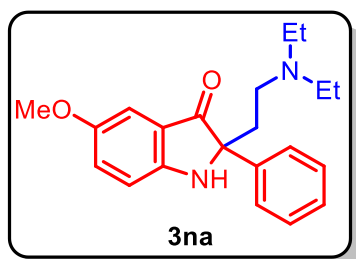

**2-(2-(diethylamino)ethyl)-5-methoxy-2-phenylindolin-3-one (3na)** According to the general procedure, **3na** was obtained using 5-methoxy-2-phenyl-3H-indol-3-one **1n** (23.7 mg, 0.1 mmol) and triethylamine **2a** (50.6 mg, 0.5 mmol) in 67% yield (22.6 mg) as a yellow oily (silica gel flash chromatography: ethyl acetate :petroleum ether :triethylamine = 2:100:1).

$R_f$  = 0.30 (ethyl acetate: petroleum ether: triethylamine = 2:100:1).

**<sup>1</sup>H NMR** (400 MHz, DMSO-*d*<sub>6</sub>) δ 7.63 (s, 1H), 7.51 (d, *J* = 7.3 Hz, 2H), 7.32 (t, *J* = 7.5 Hz, 2H), 7.25 (t, *J* = 7.2 Hz, 1H), 7.17 (dd, *J* = 8.8, 2.7 Hz, 1H), 6.98 (d, *J* = 8.8 Hz, 1H), 6.82 (d, *J* = 2.6 Hz, 1H), 3.67 (s, 3H), 2.43 – 2.32 (m, 3H), 2.31 – 2.21 (m, 3H), 2.16 – 2.04 (m, 2H), 0.81 (t, *J* = 7.1 Hz, 6H).

**<sup>13</sup>C NMR** (100 MHz, DMSO-*d*<sub>6</sub>) δ 201.1, 156.9, 152.0, 139.8, 128.3, 127.5, 127.2, 125.6, 118.0, 113.4, 104.6, 71.4, 55.5, 47.7, 46.1, 35.0, 11.6.

**HRMS** (ESI) *m/z* calcd. for C<sub>21</sub>H<sub>27</sub>N<sub>2</sub>O<sub>2</sub> (M+H)<sup>+</sup>: 339.2067, found 339.2062.

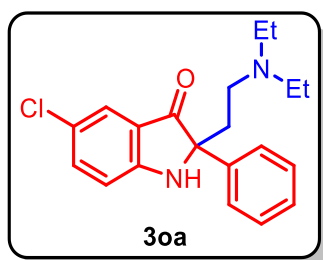

**5-chloro-2-(2-(diethylamino)ethyl)-2-phenylindolin-3-one (3oa)** According to the general procedure, **3oa** was obtained using 5-chloro-2-phenyl-3H-indol-3-one **1o** (24.1 mg, 0.1 mmol) and triethylamine **2a** (50.6 mg, 0.5 mmol) in 59% yield (20.2 mg) as a yellow oily (silica gel flash chromatography: ethyl acetate :petroleum ether :triethylamine = 2:100:1).

$R_f$  = 0.30 (ethyl acetate: petroleum ether: triethylamine = 2:100:1).

**<sup>1</sup>H NMR** (400 MHz, DMSO-*d*<sub>6</sub>) δ 8.12 (s, 1H), 7.51 – 7.48 (m, 2H), 7.45 (dd, *J* = 8.7, 2.3 Hz, 1H), 7.35 – 7.31 (m, 3H), 7.29 – 7.23 (m, 1H), 7.01 (d, *J* = 8.7 Hz, 1H), 2.46 – 2.40 (m, 1H), 2.38 – 2.29 (m, 3H), 2.26 – 2.17 (m, 3H), 2.05 – 1.98 (m, 1H), 0.76 (t, *J* = 7.1 Hz, 6H).

**<sup>13</sup>C NMR** (100 MHz, DMSO-*d*<sub>6</sub>) δ 199.5, 159.1, 139.5, 136.5, 128.5, 127.4, 125.5, 123.1, 120.9, 119.5, 113.2, 71.2, 47.7, 45.7, 35.4, 11.1.

**HRMS** (ESI) *m/z* calcd. for C<sub>20</sub>H<sub>24</sub>ClN<sub>2</sub>O (M+H)<sup>+</sup>: 343.1572, found 343.1577.

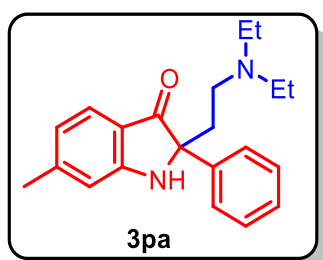

**2-(2-(diethylamino)ethyl)-6-methyl-2-phenylindolin-3-one (3pa)** According to the general procedure, **3pa** was obtained using 6-methyl-2-phenyl-3H-indol-3-one **1p** (22.1 mg, 0.1 mmol) and triethylamine **2a** (50.6 mg, 0.5 mmol) in 84% yield (27.0 mg) as a yellow oily (silica gel flash chromatography: ethyl acetate :petroleum ether :triethylamine = 2:100:1).

$R_f$  = 0.30 (ethyl acetate: petroleum ether: triethylamine = 2:100:1).

**$^1\text{H NMR}$**  (400 MHz,  $\text{DMSO-}d_6$ )  $\delta$  7.90 (s, 1H), 7.53 – 7.47 (m, 2H), 7.34 – 7.30 (m, 2H), 7.24 (t,  $J$  = 7.5 Hz, 2H), 6.79 (s, 1H), 6.51 (dd,  $J$  = 7.9, 0.7 Hz, 1H), 2.43 – 2.33 (m, 3H), 2.32 – 2.22 (m, 6H), 2.15 – 2.02 (m, 2H), 0.82 (t,  $J$  = 7.1 Hz, 6H).

**$^{13}\text{C NMR}$**  (100 MHz,  $\text{DMSO-}d_6$ )  $\delta$  200.1, 161.3, 148.2, 139.8, 128.3, 127.1, 125.5, 124.1, 119.1, 115.8, 111.5, 70.7, 47.5, 46.2, 34.9, 22.0, 11.6.

**HRMS** (ESI)  $m/z$  calcd. for  $\text{C}_{21}\text{H}_{27}\text{N}_2\text{O}$  ( $\text{M}+\text{H}$ ) $^+$ : 323.2118, found 323.2128.

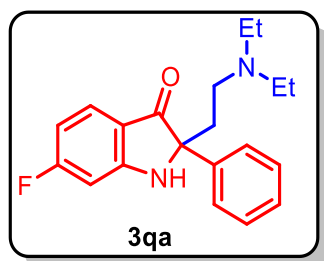

**2-(2-(diethylamino)ethyl)-6-fluoro-2-phenylindolin-3-one (3qa)** According to the general procedure, **3qa** was obtained using 6-fluoro-2-phenyl-3H-indol-3-one **1q** (22.5 mg, 0.1 mmol) and triethylamine **2a** (50.6 mg, 0.5 mmol) in 38% yield (12.4 mg) as a yellow oily (silica gel flash chromatography: ethyl acetate :petroleum ether :triethylamine = 2:100:1).

$R_f$  = 0.30 (ethyl acetate: petroleum ether: triethylamine = 2:100:1).

**$^1\text{H NMR}$**  (400 MHz,  $\text{DMSO-}d_6$ )  $\delta$  8.26 (s, 1H), 7.49 (d,  $J$  = 7.4 Hz, 2H), 7.42 – 7.38 (m, 1H), 7.33 (t,  $J$  = 7.5 Hz, 2H), 7.26 (t,  $J$  = 7.2 Hz, 1H), 6.73 (dd,  $J$  = 10.5, 2.1 Hz, 1H), 6.48 (td,  $J$  = 9.3, 2.1 Hz, 1H), 2.43 – 2.32 (m, 3H), 2.28 – 2.21 (m, 3H), 2.21 – 2.16 (m, 1H), 2.09 – 2.00 (m, 1H), 0.78 (t,  $J$  = 7.1 Hz, 6H).

**$^{13}\text{C NMR}$**  (100 MHz,  $\text{DMSO-}d_6$ )  $\delta$  199.0, 168.7 (d,  $J$  = 250.0 Hz), 162.2 (d,  $J$  = 15.0 Hz), 139.5, 128.5, 127.4, 127.0 (d,  $J$  = 12.0 Hz), 125.5, 115.2, 105.7 (d,  $J$  = 24.0 Hz), 97.4 (d,  $J$  = 25.0 Hz), 71.3, 47.6, 46.0, 35.0, 11.3.

**$^{19}\text{F NMR}$**  (376 MHz,  $\text{DMSO-}d_6$ )  $\delta$  -101.4.

**HRMS** (ESI)  $m/z$  calcd. for  $\text{C}_{20}\text{H}_{24}\text{FN}_2\text{O}$  ( $\text{M}+\text{H}$ ) $^+$ : 327.1867, found 327.1865.

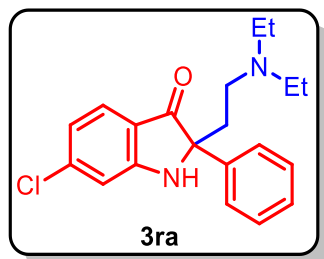

**6-chloro-2-(2-(diethylamino)ethyl)-2-phenylindolin-3-one (3ra)** According to the general procedure, **3ra** was obtained using 6-chloro-2-phenyl-3H-indol-3-one **1r** (24.1 mg, 0.1 mmol) and triethylamine **2a** (50.6 mg, 0.5 mmol) in 30% yield (10.3 mg) as a yellow oily (silica gel flash chromatography: ethyl acetate :petroleum ether :triethylamine = 2:100:1).

$R_f$  = 0.30 (ethyl acetate: petroleum ether: triethylamine = 2:100:1).

**<sup>1</sup>H NMR** (400 MHz, DMSO-*d*<sub>6</sub>) δ 8.19 (s, 1H), 7.49 (d, *J* = 7.5 Hz, 2H), 7.38 – 7.31 (m, 3H), 7.27 (d, *J* = 7.2 Hz, 1H), 7.01 (d, *J* = 1.7 Hz, 1H), 6.68 (dd, *J* = 8.2, 1.7 Hz, 1H), 2.44 – 2.34 (m, 3H), 2.32 – 2.26 (m, 1H), 2.25 – 2.18 (m, 3H), 2.05 – 1.99 (m, 1H), 0.77 (t, *J* = 7.1 Hz, 6H).

**<sup>13</sup>C NMR** (100 MHz, DMSO-*d*<sub>6</sub>) δ 199.4, 161.0, 141.9, 139.5, 128.5, 127.5, 125.9, 125.5, 117.5, 117.30, 110.9, 71.0, 47.7, 45.8, 35.2, 11.2.

**HRMS** (ESI) *m/z* calcd. for C<sub>20</sub>H<sub>24</sub>ClN<sub>2</sub>O (M+H)<sup>+</sup>: 343.1572, found 343.1568.

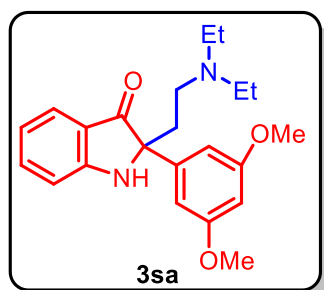

**2-(2-(diethylamino)ethyl)-2-(3,5-dimethoxyphenyl)indolin-3-one (3sa)** According to the general procedure, **3sa** was obtained using 2-(3,5-dimethoxyphenyl)-3H-indol-3-one **1s** (26.7 mg, 0.1 mmol) and triethylamine **2a** (50.6 mg, 0.5 mmol) in 62% yield (22.8 mg) as a yellow oily (silica gel flash chromatography: ethyl acetate :petroleum ether :triethylamine = 2:100:1).

*R<sub>f</sub>* = 0.30 (ethyl acetate: petroleum ether: triethylamine = 2:100:1).

**<sup>1</sup>H NMR** (400 MHz, DMSO-*d*<sub>6</sub>) δ 7.94 (s, 1H), 7.47 – 7.42 (m, 1H), 7.34 (d, *J* = 7.6 Hz, 1H), 6.97 (d, *J* = 8.3 Hz, 1H), 6.69 – 6.65 (m, 3H), 6.41 (t, *J* = 2.2 Hz, 1H), 3.71 (s, 6H), 2.40 – 2.33 (m, 3H), 2.29 – 2.20 (m, 3H), 2.12 – 1.99 (m, 2H), 0.80 (t, *J* = 7.1 Hz, 6H).

**<sup>13</sup>C NMR** (101 MHz, DMSO-*d*<sub>6</sub>) δ 200.4, 160.7, 160.4, 142.1, 137.1, 124.2, 118.2, 117.3, 111.6, 104.0, 98.4, 70.4, 55.2, 47.7, 46.0, 35.3, 11.5.

**HRMS** (ESI) *m/z* calcd. for C<sub>22</sub>H<sub>29</sub>N<sub>2</sub>O<sub>3</sub> (M+H)<sup>+</sup>: 369.2173, found 369.2173.

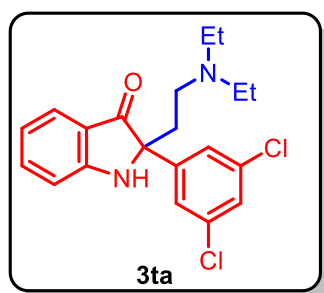

**2-(3,5-dichlorophenyl)-2-(2-(diethylamino)ethyl)indolin-3-one (3ta)** According to the general procedure, **3ta** was obtained using 2-(3,5-dichlorophenyl)-3H-indol-3-one **1t** (27.5 mg, 0.1 mmol) and triethylamine **2a** (50.6 mg, 0.5 mmol) in 48% yield (18.1 mg) as a yellow oily (silica gel flash chromatography: ethyl acetate :petroleum ether :triethylamine = 2:100:1).

*R<sub>f</sub>* = 0.30 (ethyl acetate: petroleum ether: triethylamine = 2:100:1).

**<sup>1</sup>H NMR** (400 MHz, DMSO-*d*<sub>6</sub>) δ 8.02 (s, 1H), 7.57 – 7.52 (m, 3H), 7.51 – 7.45 (m, 1H), 7.36 (d, *J* = 7.6 Hz, 1H), 7.01 (d, *J* = 8.3 Hz, 1H), 6.72 (t, *J* = 7.3 Hz, 1H), 2.41 – 2.29 (m, 3H), 2.26 – 2.18 (m, 3H), 2.18 – 2.13 (m, 1H), 2.02 – 1.97 (m, 1H), 0.75 (t, *J* = 7.1 Hz, 6H).

**<sup>13</sup>C NMR** (101 MHz, DMSO-*d*<sub>6</sub>) δ 199.5, 160.5, 144.6, 137.4, 134.1, 127.0, 124.5, 124.3, 118.1, 117.8, 111.9, 69.8, 47.7, 45.7, 35.7, 11.2.

**HRMS** (ESI) *m/z* calcd. for C<sub>20</sub>H<sub>23</sub>Cl<sub>2</sub>N<sub>2</sub>O (M+H)<sup>+</sup>: 377.1182, found 377.1187.

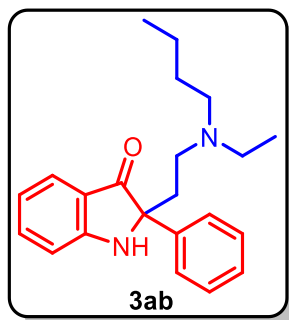

**2-(2-(butyl(ethyl)amino)ethyl)-2-phenylindolin-3-one (3ab)** According to the general procedure, **3ab** was obtained using 2-phenyl-3*H*-indol-3-one **1a** (20.7 mg, 0.1 mmol) and *N,N*-diethylbutan-1-amine **2b** (64.6 mg, 0.5 mmol) in 30% yield (10.1 mg) as a yellow oily (silica gel flash chromatography: ethyl acetate :petroleum ether :triethylamine = 2:100:1).

$R_f$  = 0.30 (ethyl acetate: petroleum ether: triethylamine = 2:100:1).

**<sup>1</sup>H NMR** (400 MHz, CDCl<sub>3</sub>) δ 7.74 – 7.61 (m, 3H), 7.54 (d,  $J$  = 7.7 Hz, 1H), 7.47 – 7.43 (m, 1H), 7.32 (t,  $J$  = 7.5 Hz, 2H), 7.25 – 7.22 (m, 1H), 6.92 (d,  $J$  = 8.3 Hz, 1H), 6.76 (t,  $J$  = 7.2 Hz, 1H), 2.62 – 2.51 (m, 2H), 2.50 – 2.43 (m, 1H), 2.33 – 2.17 (m, 3H), 2.15 – 2.07 (m, 1H), 1.99 – 1.90 (m, 1H), 1.30 – 1.22 (m, 4H), 0.92 – 0.84 (m, 6H).

**<sup>13</sup>C NMR** (100 MHz, CDCl<sub>3</sub>) δ 203.0, 160.9, 138.7, 137.2, 128.3, 127.3, 126.5, 125.4, 119.4, 118.5, 112.8, 72.4, 53.2, 50.4, 47.1, 34.5, 29.2, 20.8, 14.1, 11.7.

**HRMS** (ESI)  $m/z$  calcd. for C<sub>22</sub>H<sub>29</sub>N<sub>2</sub>O (M+H)<sup>+</sup>: 337.2275, found 337.2278.

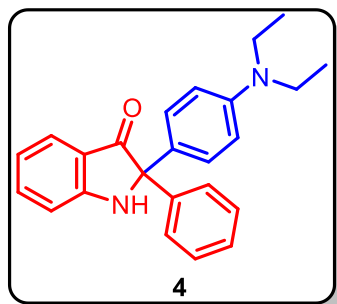

**2-(4-(diethylamino)phenyl)-2-phenylindolin-3-one (4)** According to the general procedure, **4** was obtained using 2-phenyl-3*H*-indol-3-one **1a** (20.7 mg, 0.1 mmol) and *N,N*-diethylaniline **2** (74.6 mg, 0.5 mmol) in 92% yield (32.7 mg) as a yellow oily (silica gel flash chromatography: ethyl acetate :petroleum ether :triethylamine = 2:100:1).

$R_f$  = 0.30 (ethyl acetate: petroleum ether: triethylamine = 2:100:1).

**<sup>1</sup>H NMR** (400 MHz, DMSO-*d*<sub>6</sub>) δ 8.38 (s, 1H), 7.50 – 7.45 (m, 1H), 7.43 (d,  $J$  = 7.7 Hz, 1H), 7.37 – 7.25 (m, 5H), 7.07 (d,  $J$  = 8.9 Hz, 2H), 6.94 (d,  $J$  = 8.3 Hz, 1H), 6.70 (t,  $J$  = 7.4 Hz, 1H), 6.58 (d,  $J$  = 9.0 Hz, 2H), 3.27 (q,  $J$  = 7.0 Hz, 4H), 1.03 (t,  $J$  = 7.0 Hz, 6H).

**<sup>13</sup>C NMR** (100 MHz, DMSO-*d*<sub>6</sub>) δ 200.8, 160.7, 146.7, 141.4, 137.8, 128.2, 128.1, 127.4, 127.1, 126.6, 124.6, 117.6, 117.5, 111.6, 111.1, 73.7, 43.7, 12.5.

**HRMS** (ESI)  $m/z$  calcd. for C<sub>24</sub>H<sub>25</sub>N<sub>2</sub>O (M+H)<sup>+</sup>: 357.1962, found 357.1967.

### 3. Gram-scale experiments and transformations of the products

#### a) Gram-scale synthesis of **3aa**

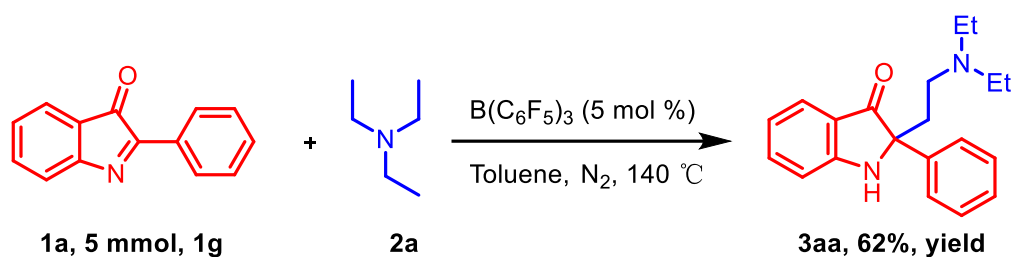

According to the general procedure, **3aa** was obtained using **1a** (1000 mg, 5 mmol), **2a** (2529.8 mg, 25 mmol) and **B(C<sub>6</sub>F<sub>5</sub>)<sub>3</sub>** (128 mg, 5 mol%) in 62% yield (954 mg) as a yellow oily (silica gel flash chromatography: ethyl acetate: petroleum ether: triethylamine = 2:100:1).

#### b) Derivatizations of **3aa**

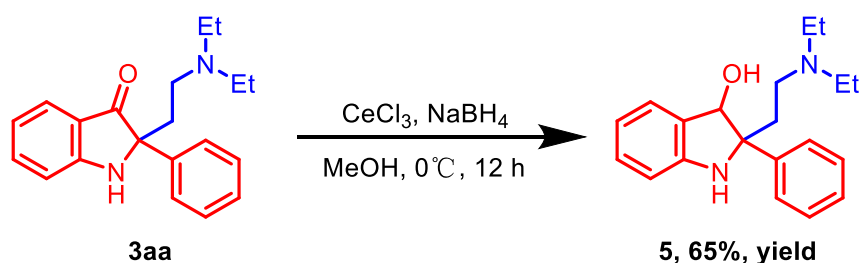

To a solution of the compound **3aa** (30.8 mg, 0.1 mmol) in anhydrous MeOH (1.0 mL) at 0 °C, CeCl<sub>3</sub> (29.6 mg, 0.12 mmol) was added and followed by the addition of NaBH<sub>4</sub> (5.7 mg, 0.15 mmol). The reaction mixture was allowed to stir for 1 h at the same temperature and then the bath temperature was slowly warmed to room temperature. When **3aa** was fully converted and excessive NaBH<sub>4</sub> was consumed completely, the mixture was concentrated in vacuo and the residue was purified via column chromatography on silica gel (ethyl acetate: petroleum ether: triethylamine = 2:100:1) to afford the product **5** (65%, 20 mg) as a white solid.

*R<sub>f</sub>* = 0.30 (ethyl acetate: petroleum ether: triethylamine = 2:100:1).

**<sup>1</sup>H NMR** (400 MHz, DMSO-*d*<sub>6</sub>) δ 7.52 (d, *J* = 7.5 Hz, 2H), 7.32 (t, *J* = 7.6 Hz, 2H), 7.20 (t, *J* = 7.3 Hz, 1H), 7.06 (d, *J* = 7.2 Hz, 1H), 7.00 (t, *J* = 7.5 Hz, 1H), 6.60 (d, *J* = 7.8 Hz, 1H), 6.55 (t, *J* = 7.3 Hz, 1H), 6.40 (s, 1H), 4.85 (s, 1H), 2.41 – 2.32 (m, 3H), 2.23 – 2.14 (m, 2H), 2.13 – 2.08 (m, 2H), 1.89 – 1.79 (m, 1H), 0.81 (t, *J* = 7.1 Hz, 6H).

**<sup>13</sup>C NMR** (100 MHz, DMSO-*d*<sub>6</sub>) δ 149.9, 148.0, 130.0, 128.6, 128.0, 126.1, 125.5, 124.5, 116.8, 108.2, 81.0, 73.0, 48.3, 45.9, 32.5, 11.1.

**HRMS** (ESI) *m/z* calcd. for C<sub>20</sub>H<sub>27</sub>N<sub>2</sub>O (M+H)<sup>+</sup>: 311.2118, found 311.2114.

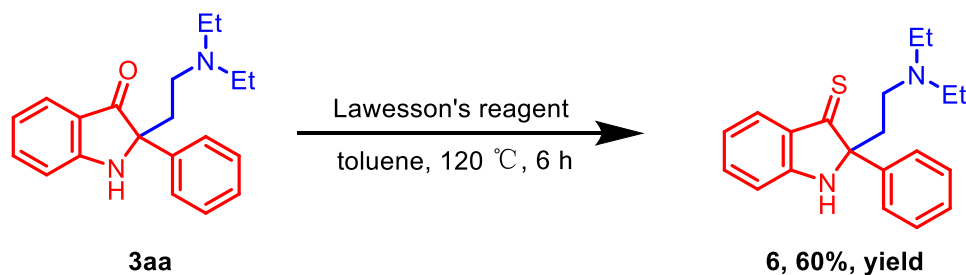

A solution of the compound **3aa** (30.8 mg, 0.1 mmol) and Lawesson's reagent (48.6 mg, 0.12 mmol)

in toluene (1.5 mL) was heated to 120 °C at reflux under argon for 6 h. Then the mixture was concentrated in vacuo, and the residue was purified via column chromatography on silica gel (ethyl acetate: petroleum ether: triethylamine = 2:80:1) to afford the product **6** (60%, 19.5 mg) as a red oily.  $R_f = 0.20$  (ethyl acetate: petroleum ether: triethylamine = 2:100:1).

**$^1\text{H}$  NMR** (400 MHz, Acetone- $d_6$ )  $\delta$  8.56 (s, 1H), 7.64 – 7.52 (m, 4H), 7.33 – 7.27 (m, 2H), 7.26 – 7.22 (m, 1H), 7.18 (d,  $J = 8.4$  Hz, 1H), 6.79 – 6.75 (m, 1H), 2.63 – 2.50 (m, 4H), 2.44 – 2.38 (m, 1H), 2.36 – 2.30 (m, 2H), 2.21 – 2.13 (m, 1H), 0.91 (t,  $J = 7.1$  Hz, 6H).

**$^{13}\text{C}$  NMR** (100 MHz, Acetone- $d_6$ )  $\delta$  235.1, 161.5, 140.6, 139.3, 133.2, 129.0, 128.1, 127.2, 125.9, 119.8, 113.5, 83.6, 49.5, 47.6, 39.5, 12.2.

**HRMS** (ESI)  $m/z$  calcd. for  $\text{C}_{20}\text{H}_{25}\text{N}_2\text{S}$  ( $\text{M}+\text{H}$ ) $^+$ : 325.1733, found 325.1731.

#### 4. Reference

- [1]. Lian, X.-L.; Lei, H.; Quan, X.-J.; Ren, Z.-H.; Wang, Y.-Y.; Guan, Z.-H. *Chem. Commun.* **2013**, 49, 8196.
- [2]. (a) Lindsay, A. C.; Leung, I. K. H.; Sperry, J. *Org. Lett.* **2016**, 18, 5404. (b) Ling, K.-Q. *Synth. Commun.* **1995**, 25, 3831. (c) Liu, J.-X.; Zhou, Q.-Q.; Deng, J.-G.; Chen, Y.-C. *Org. Biomol. Chem.* **2013**, 11, 8175. (d) Najahi, E.; Valentin, A.; Fabre, P.-L.; Reybier, K.; Nepveu, F. *Eur. J. Med. Chem.* **2014**, 78, 269. (e) Huang, J.-R.; Qin, L.; Zhu, Y.-Q.; Song, Q.; Dong, L. *Chem. Commun.* **2015**, 51, 2844.

#### 5. Copies of NMR spectra

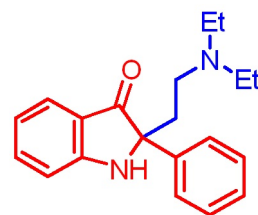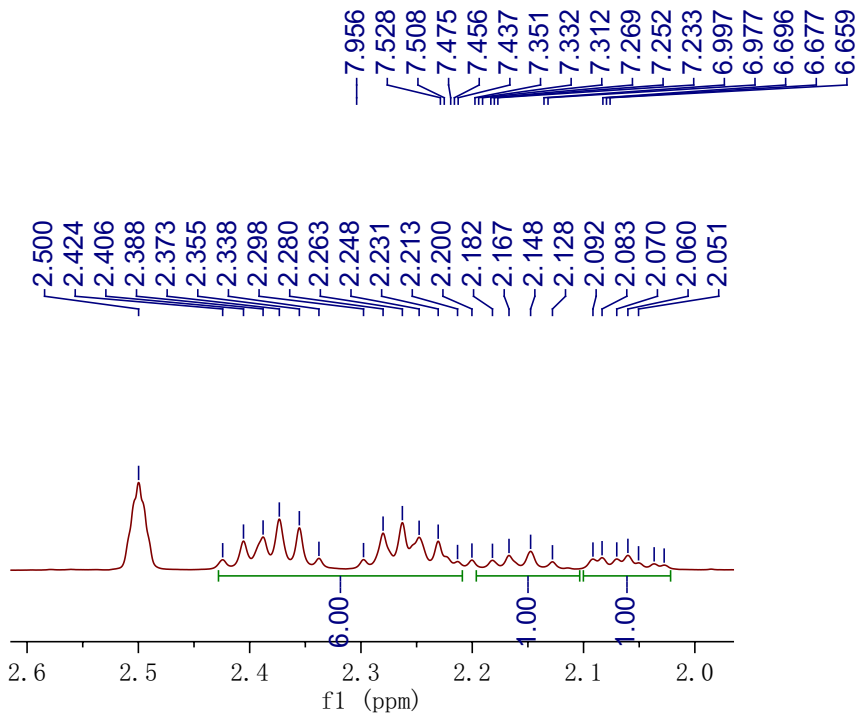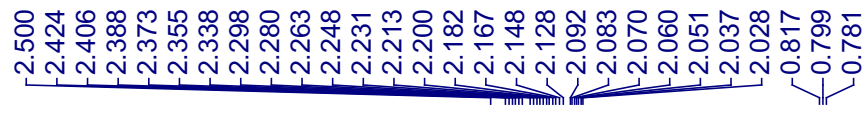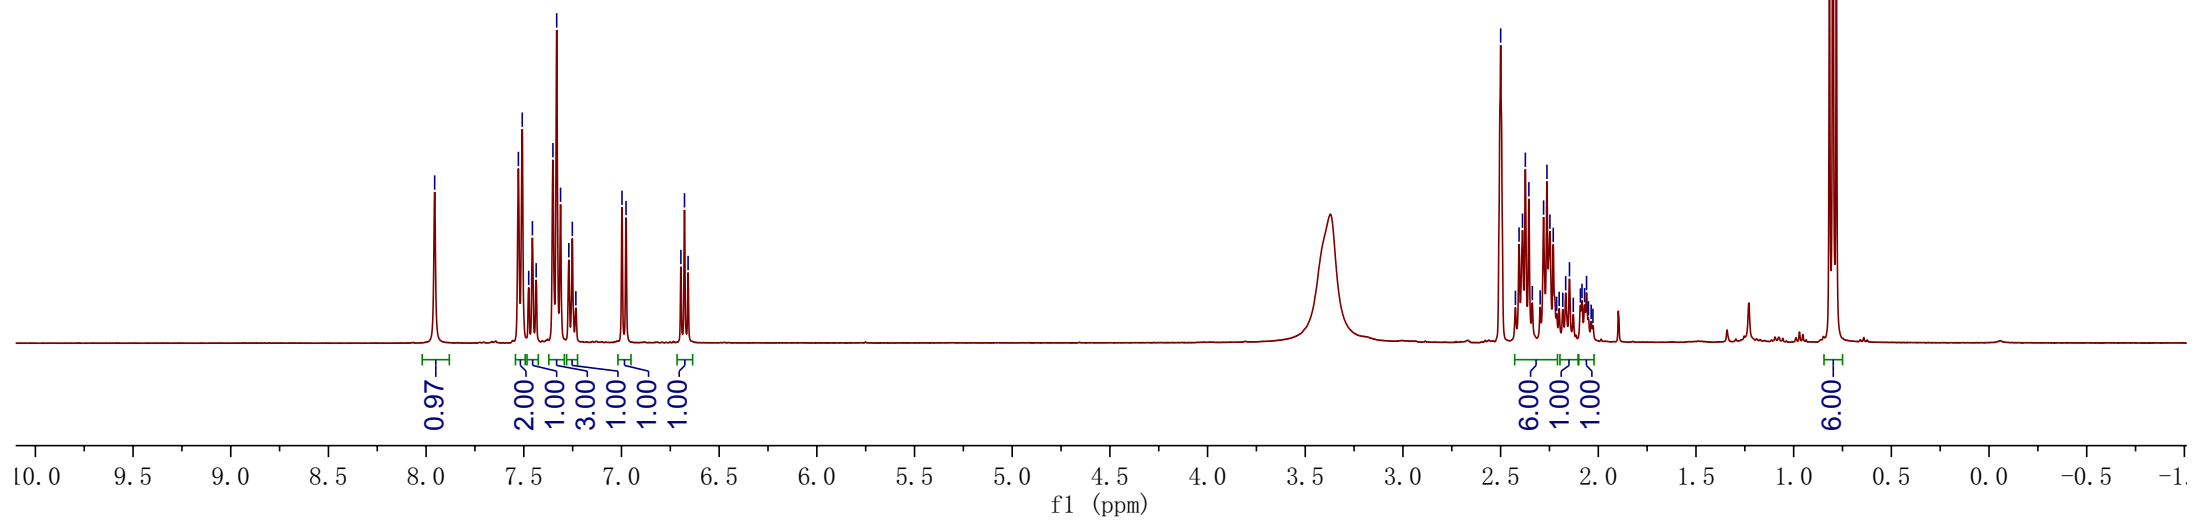



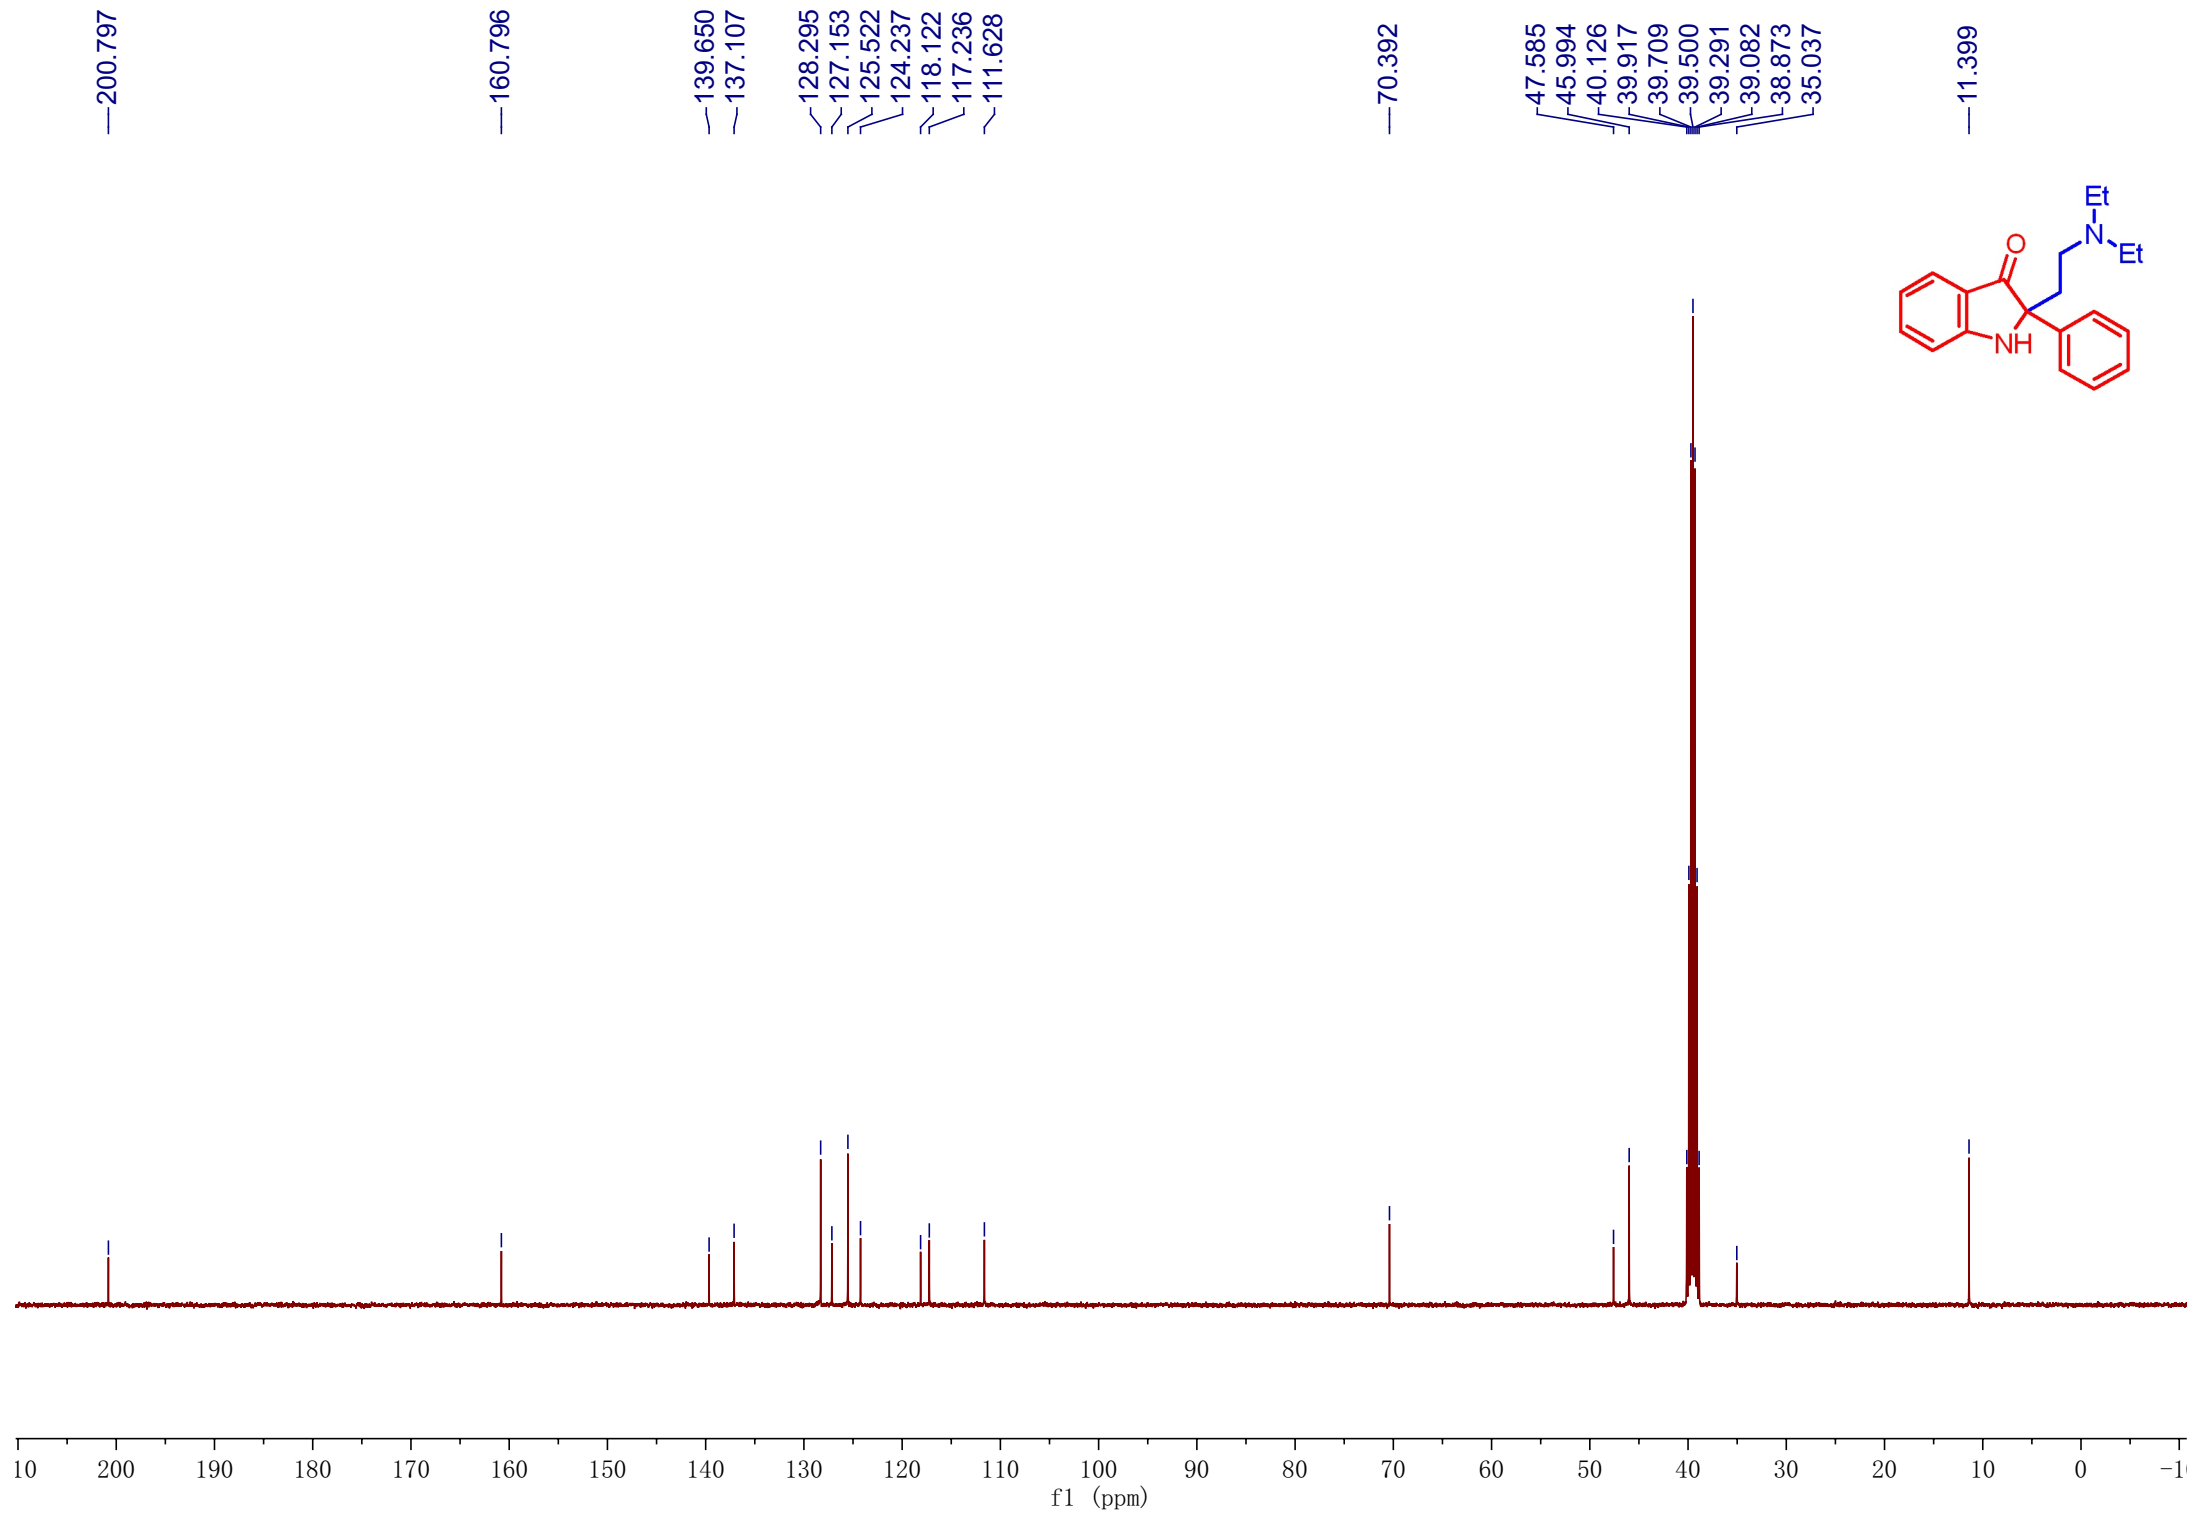

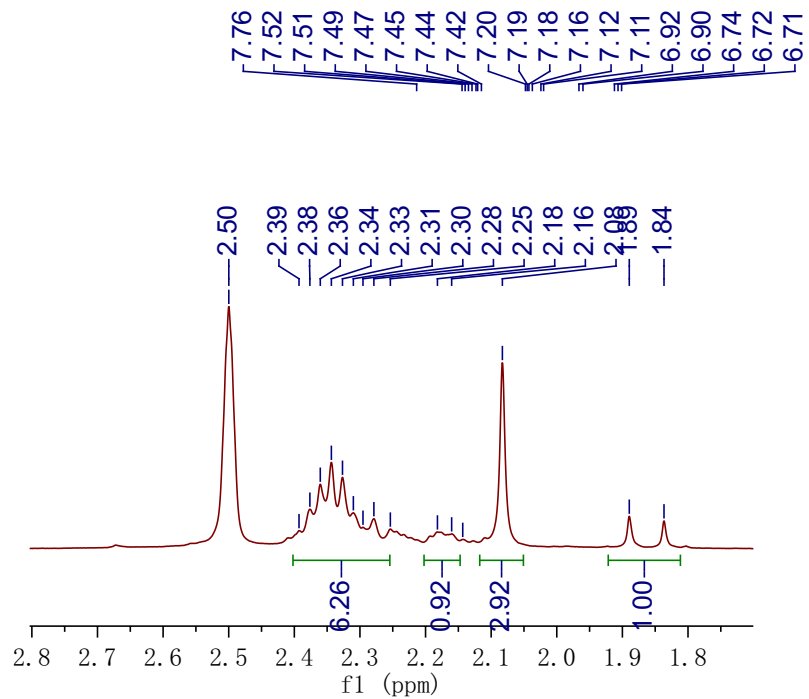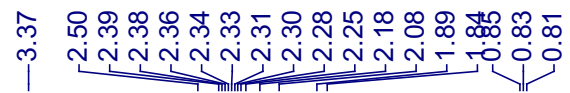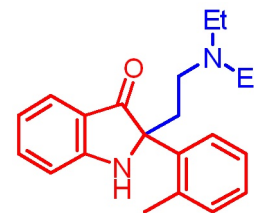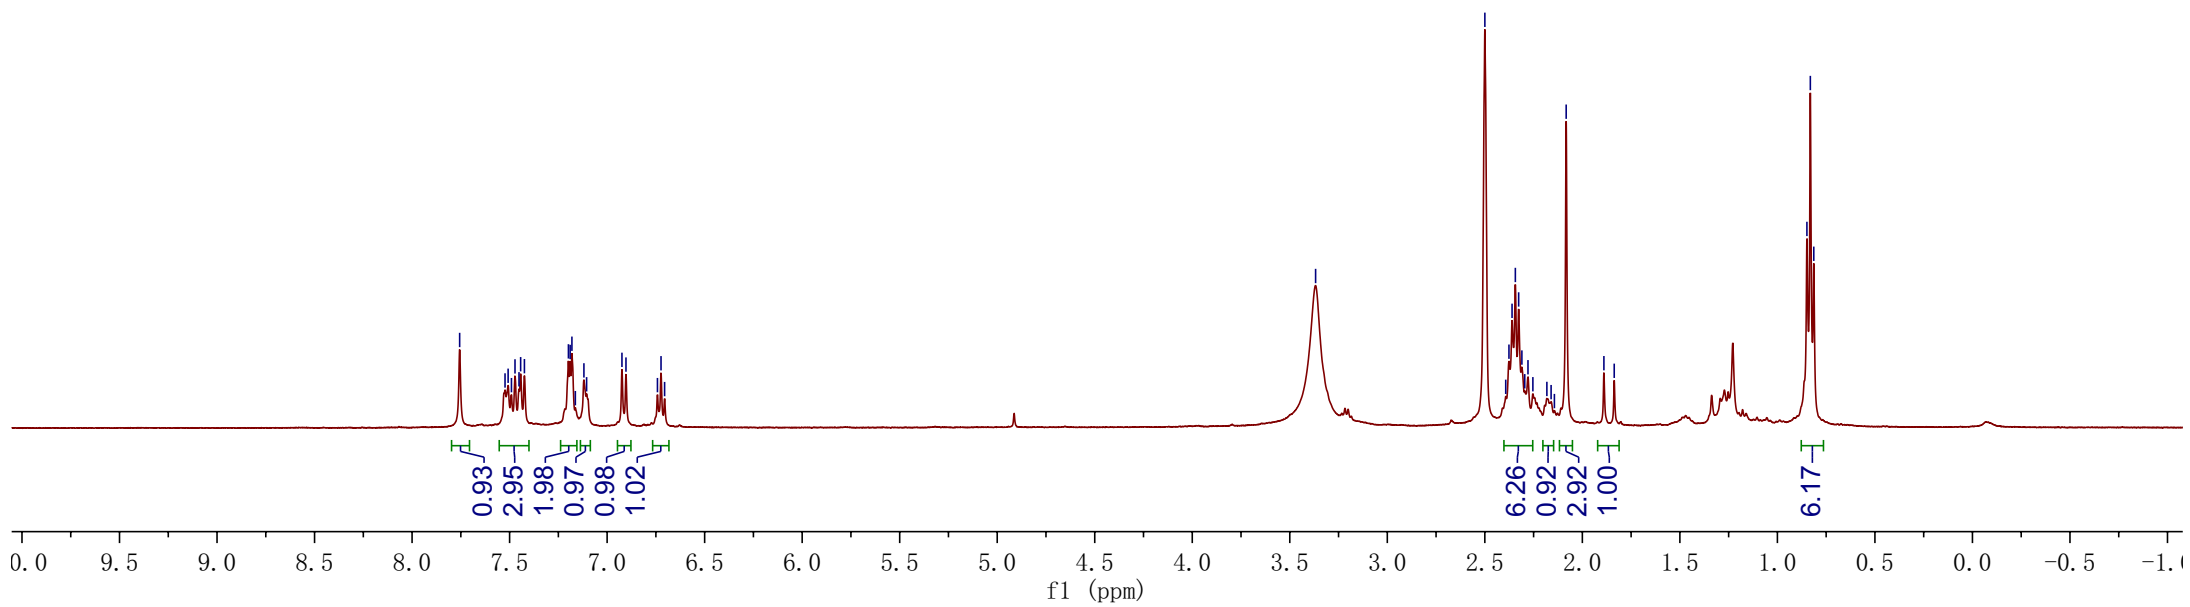

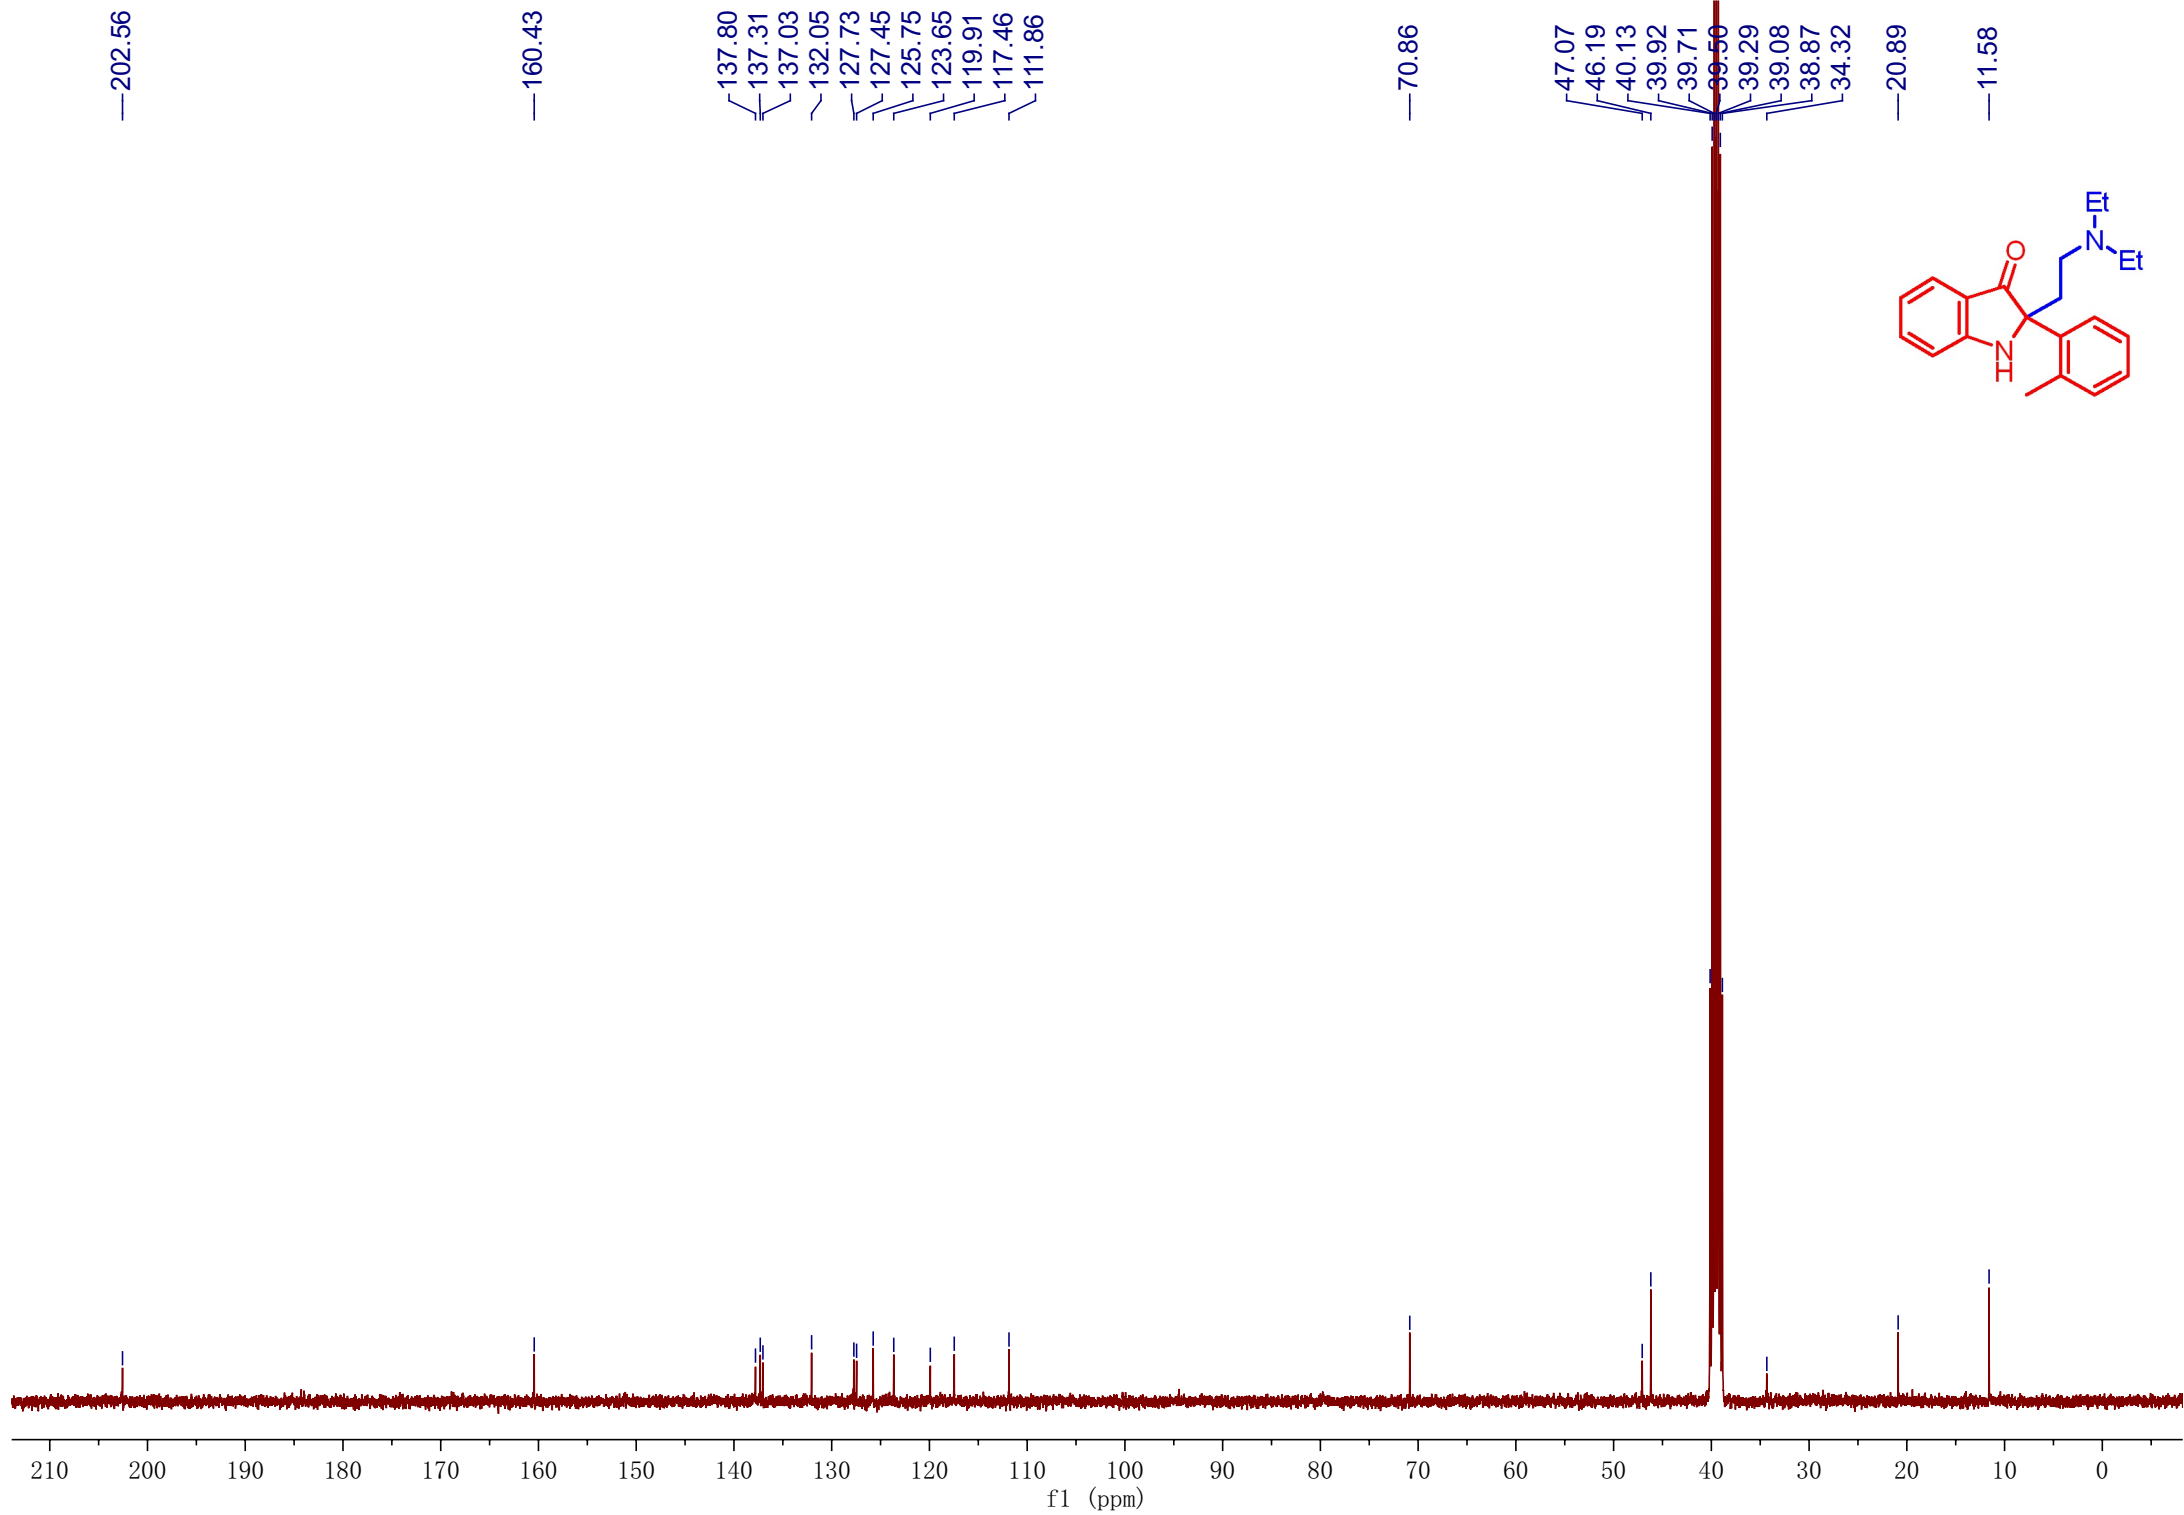



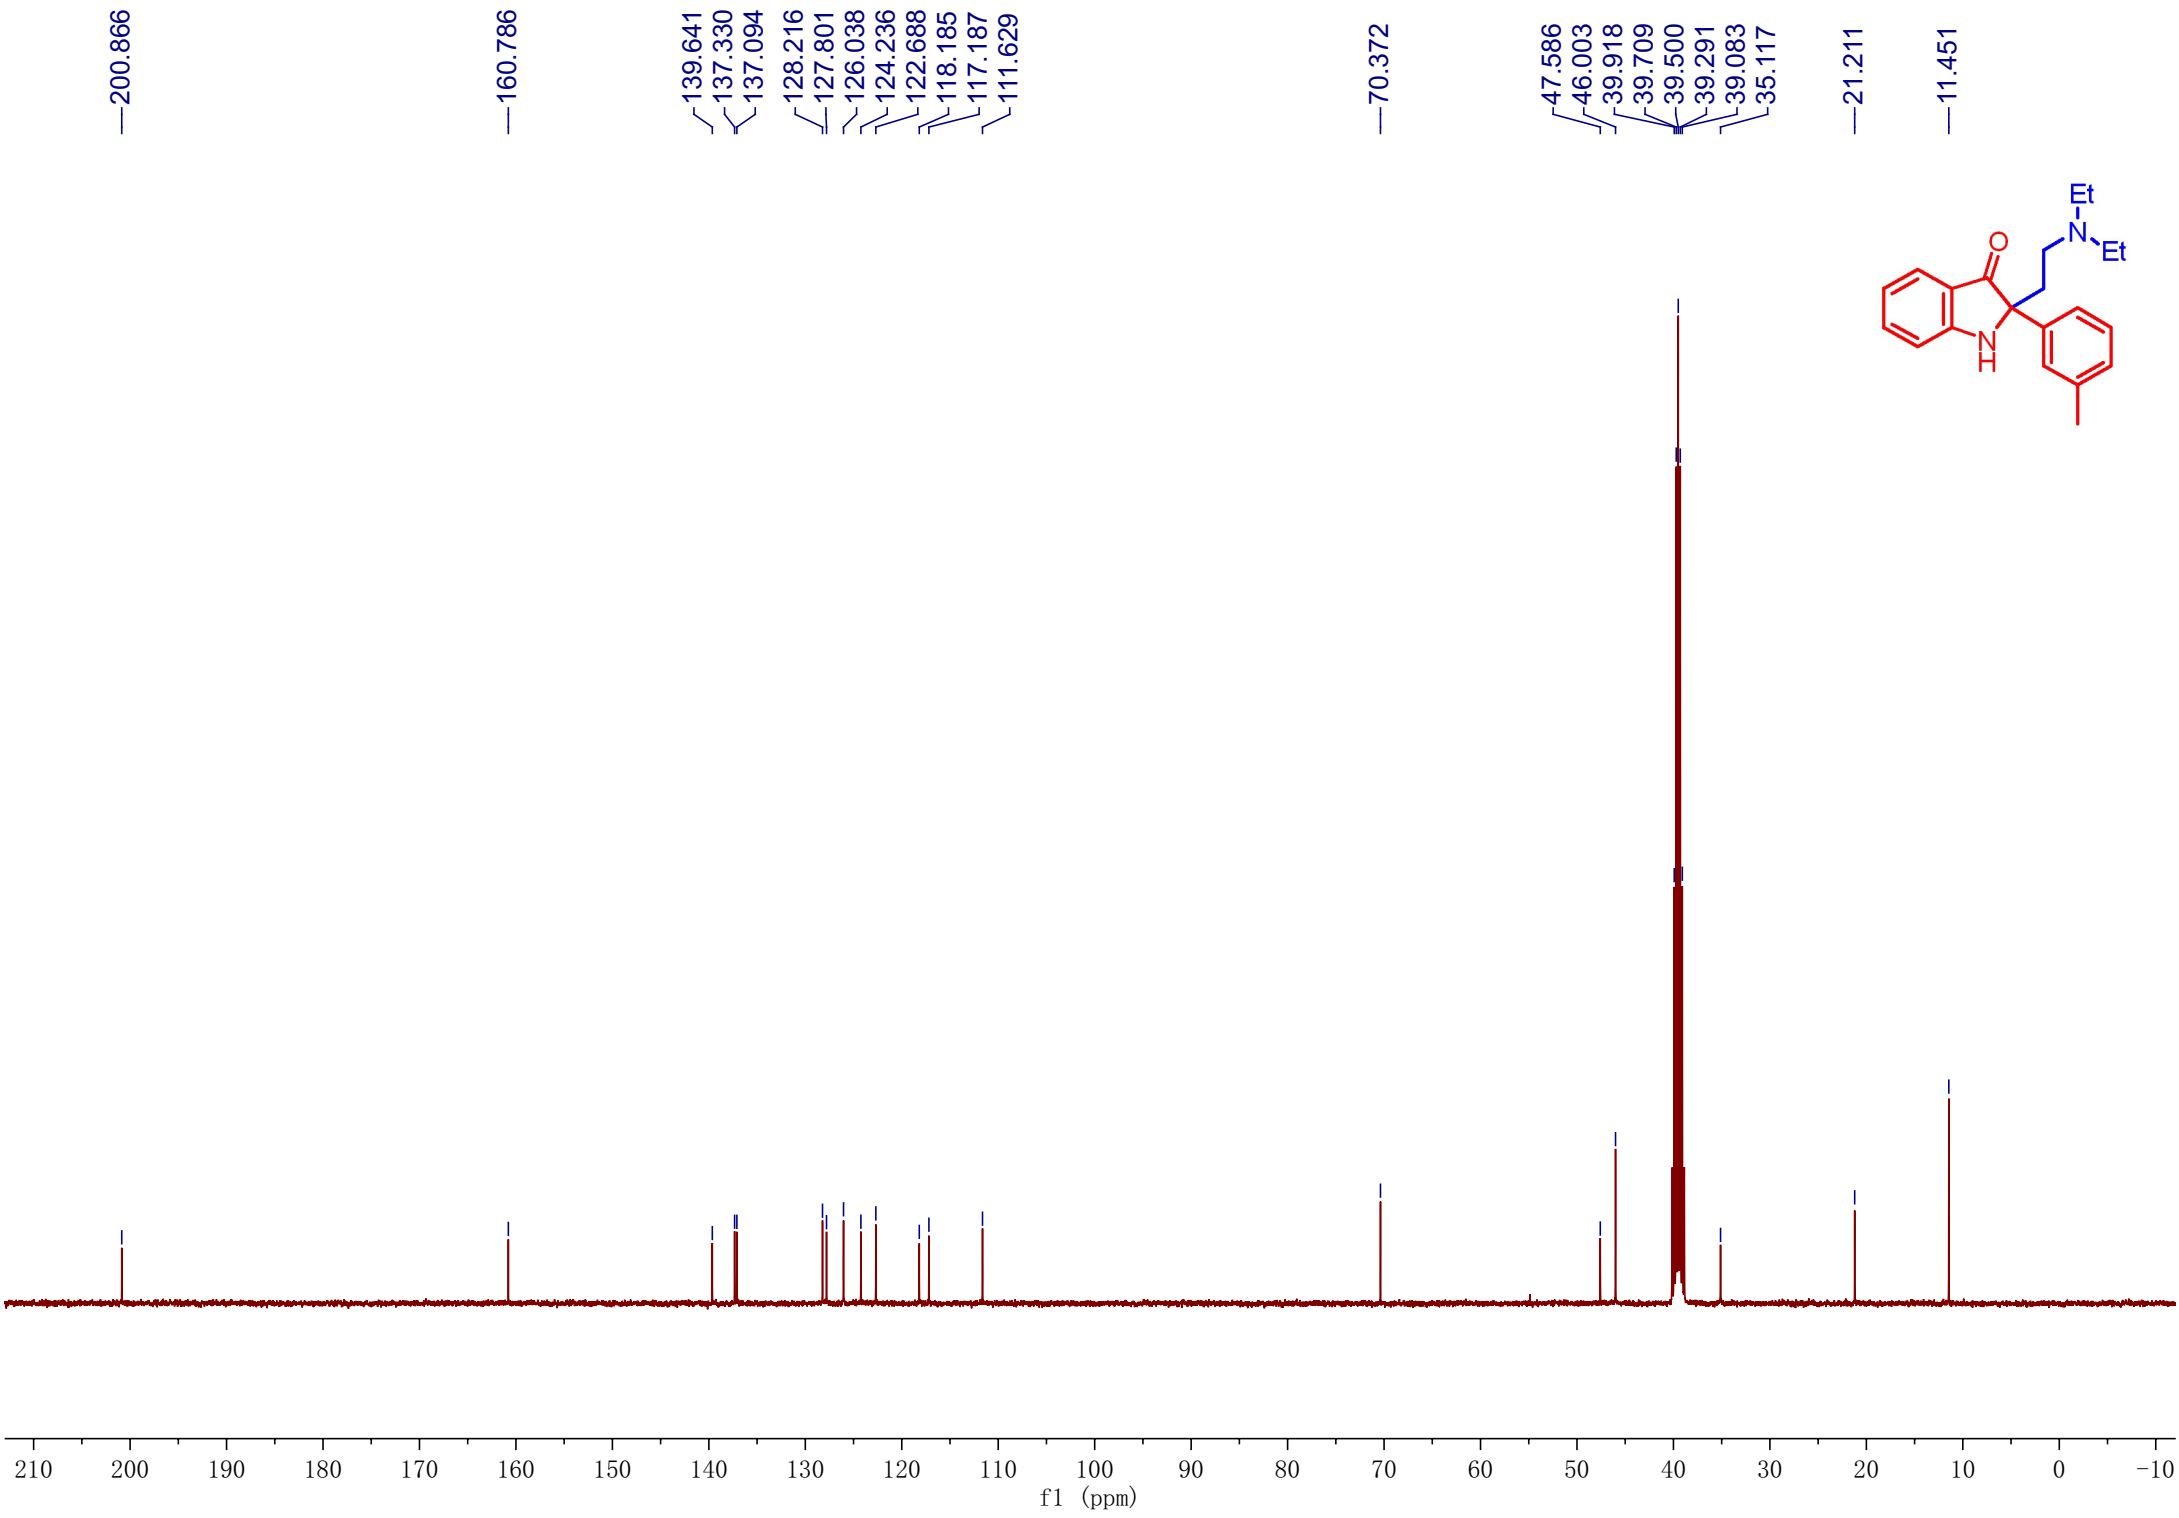

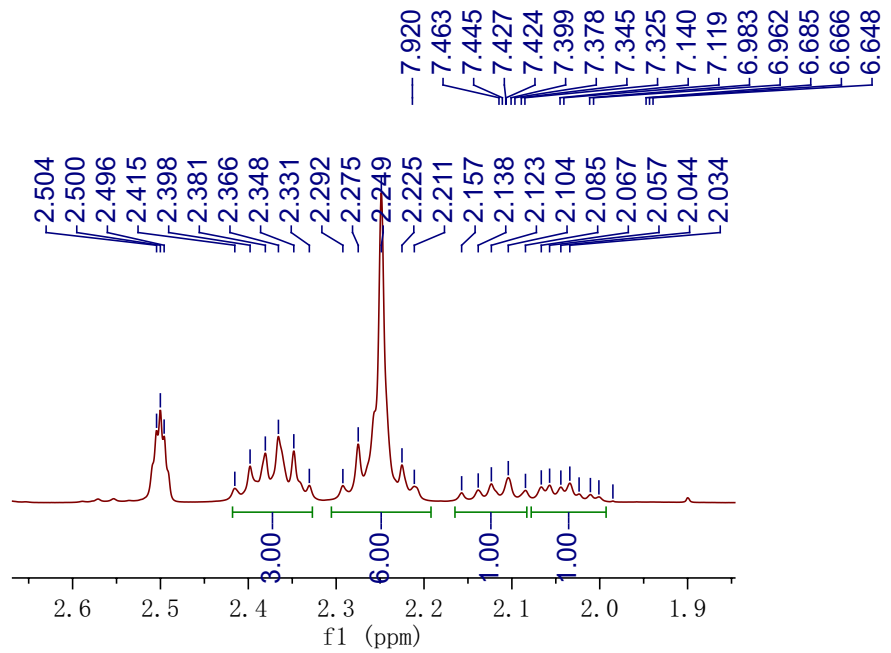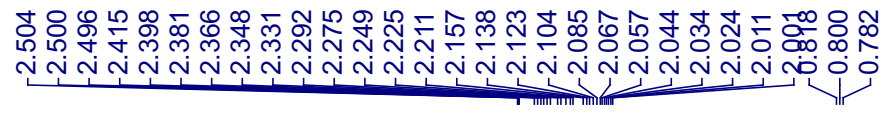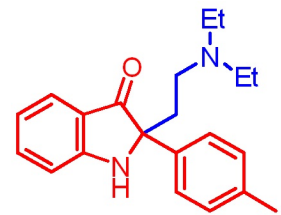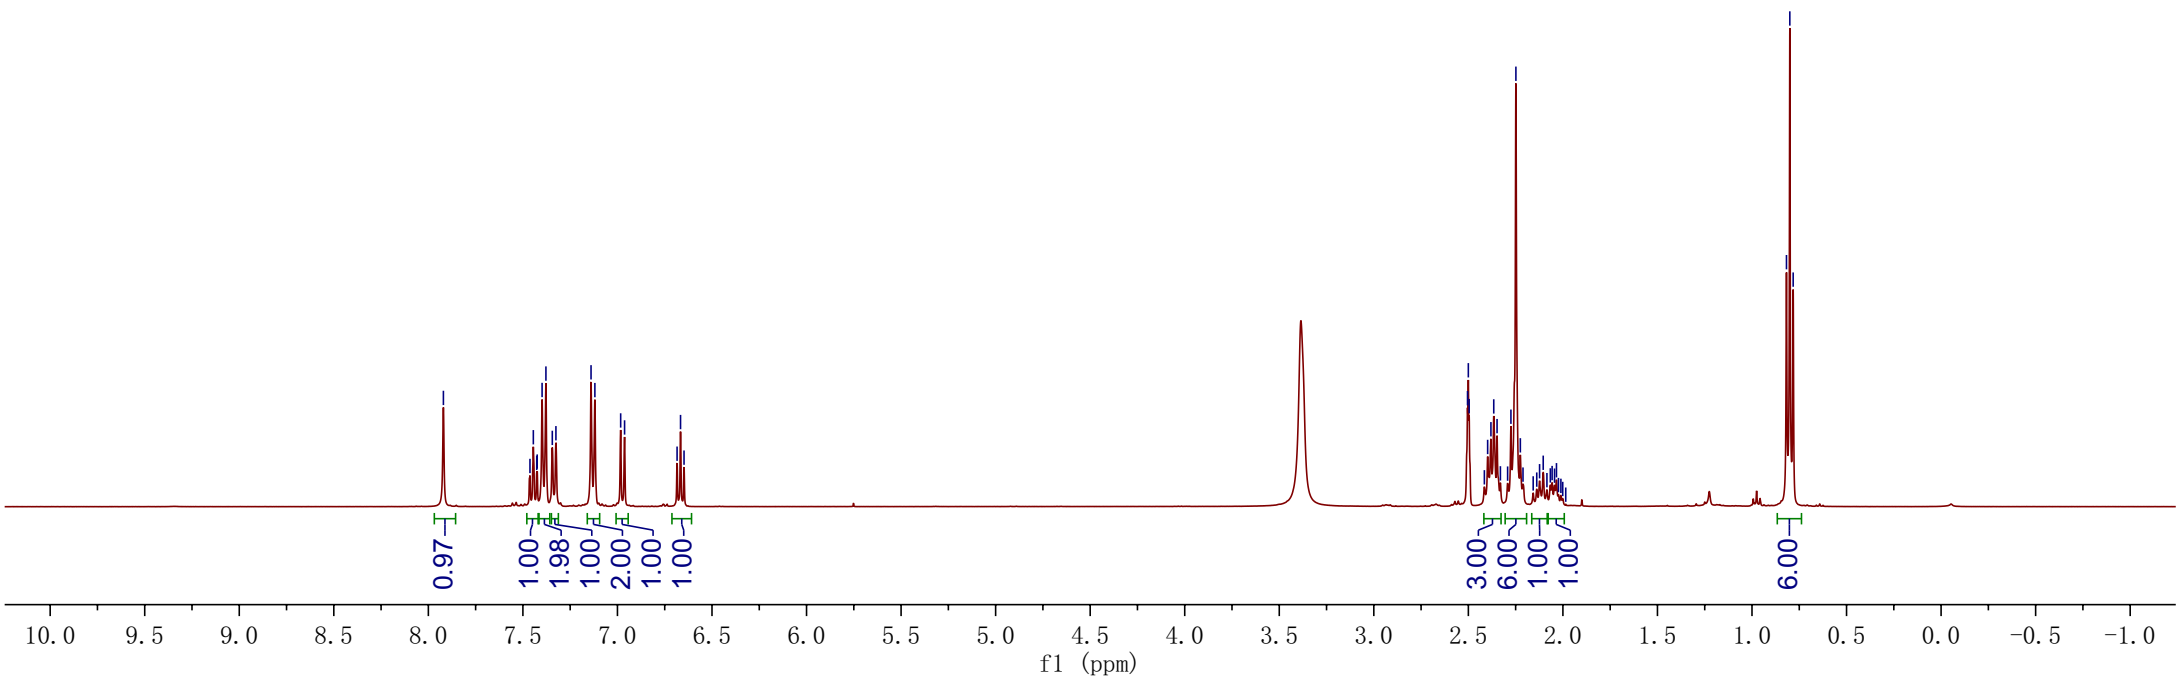

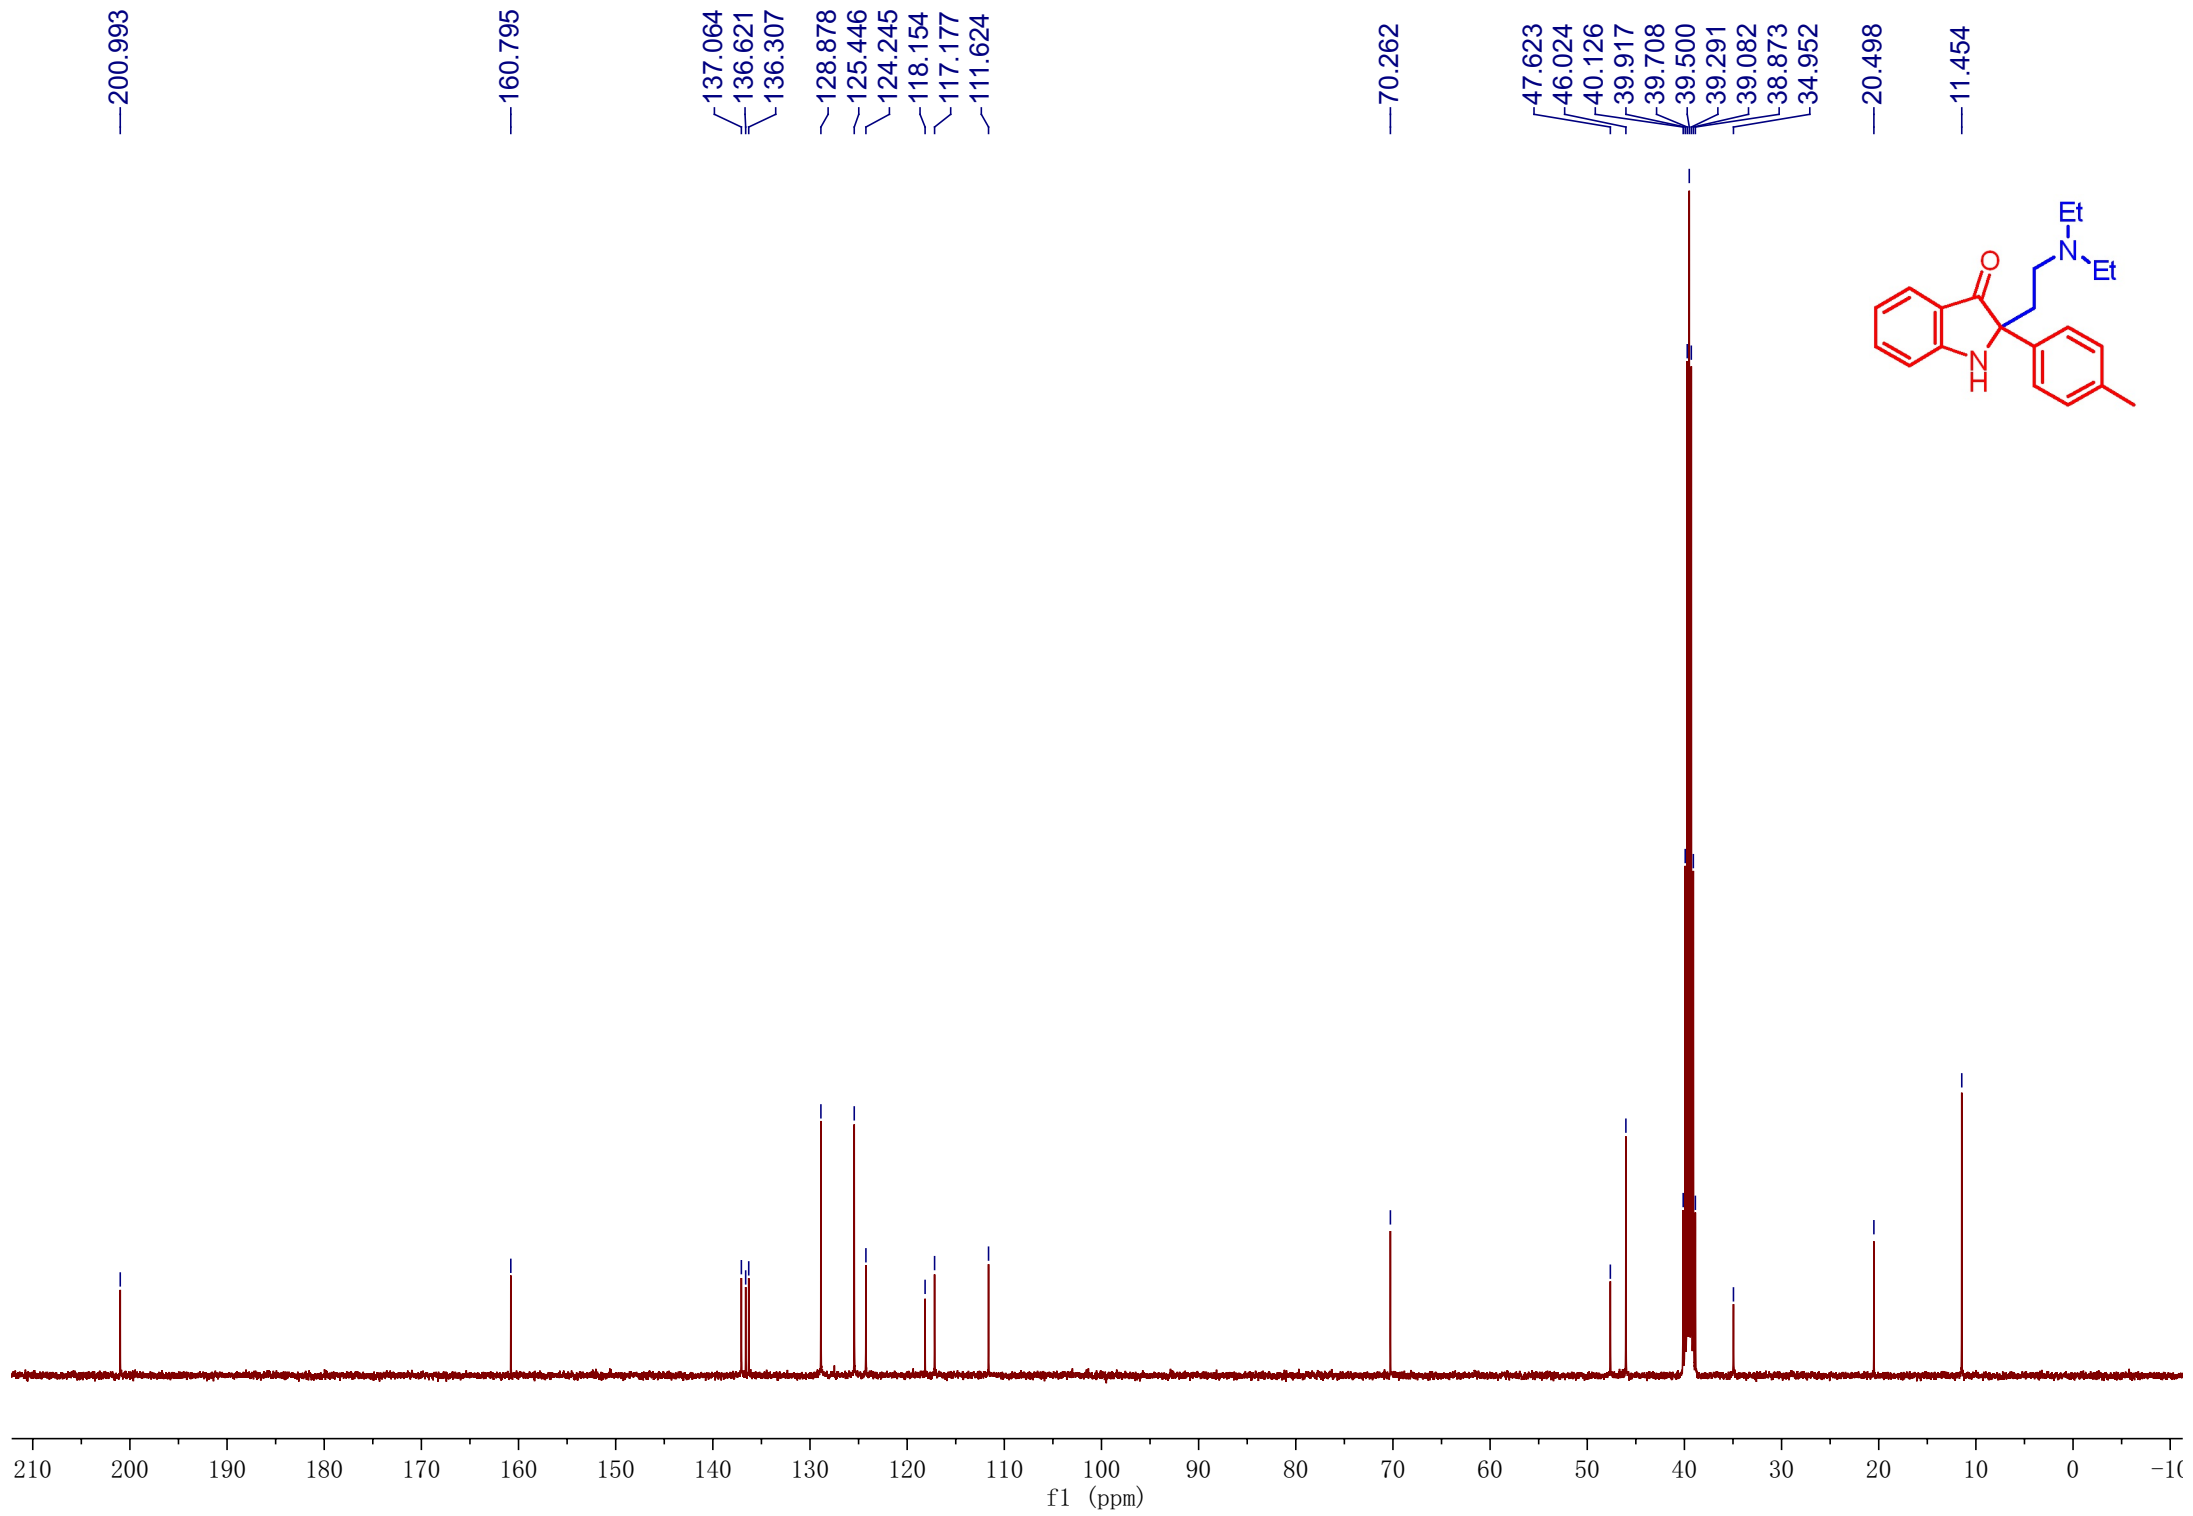

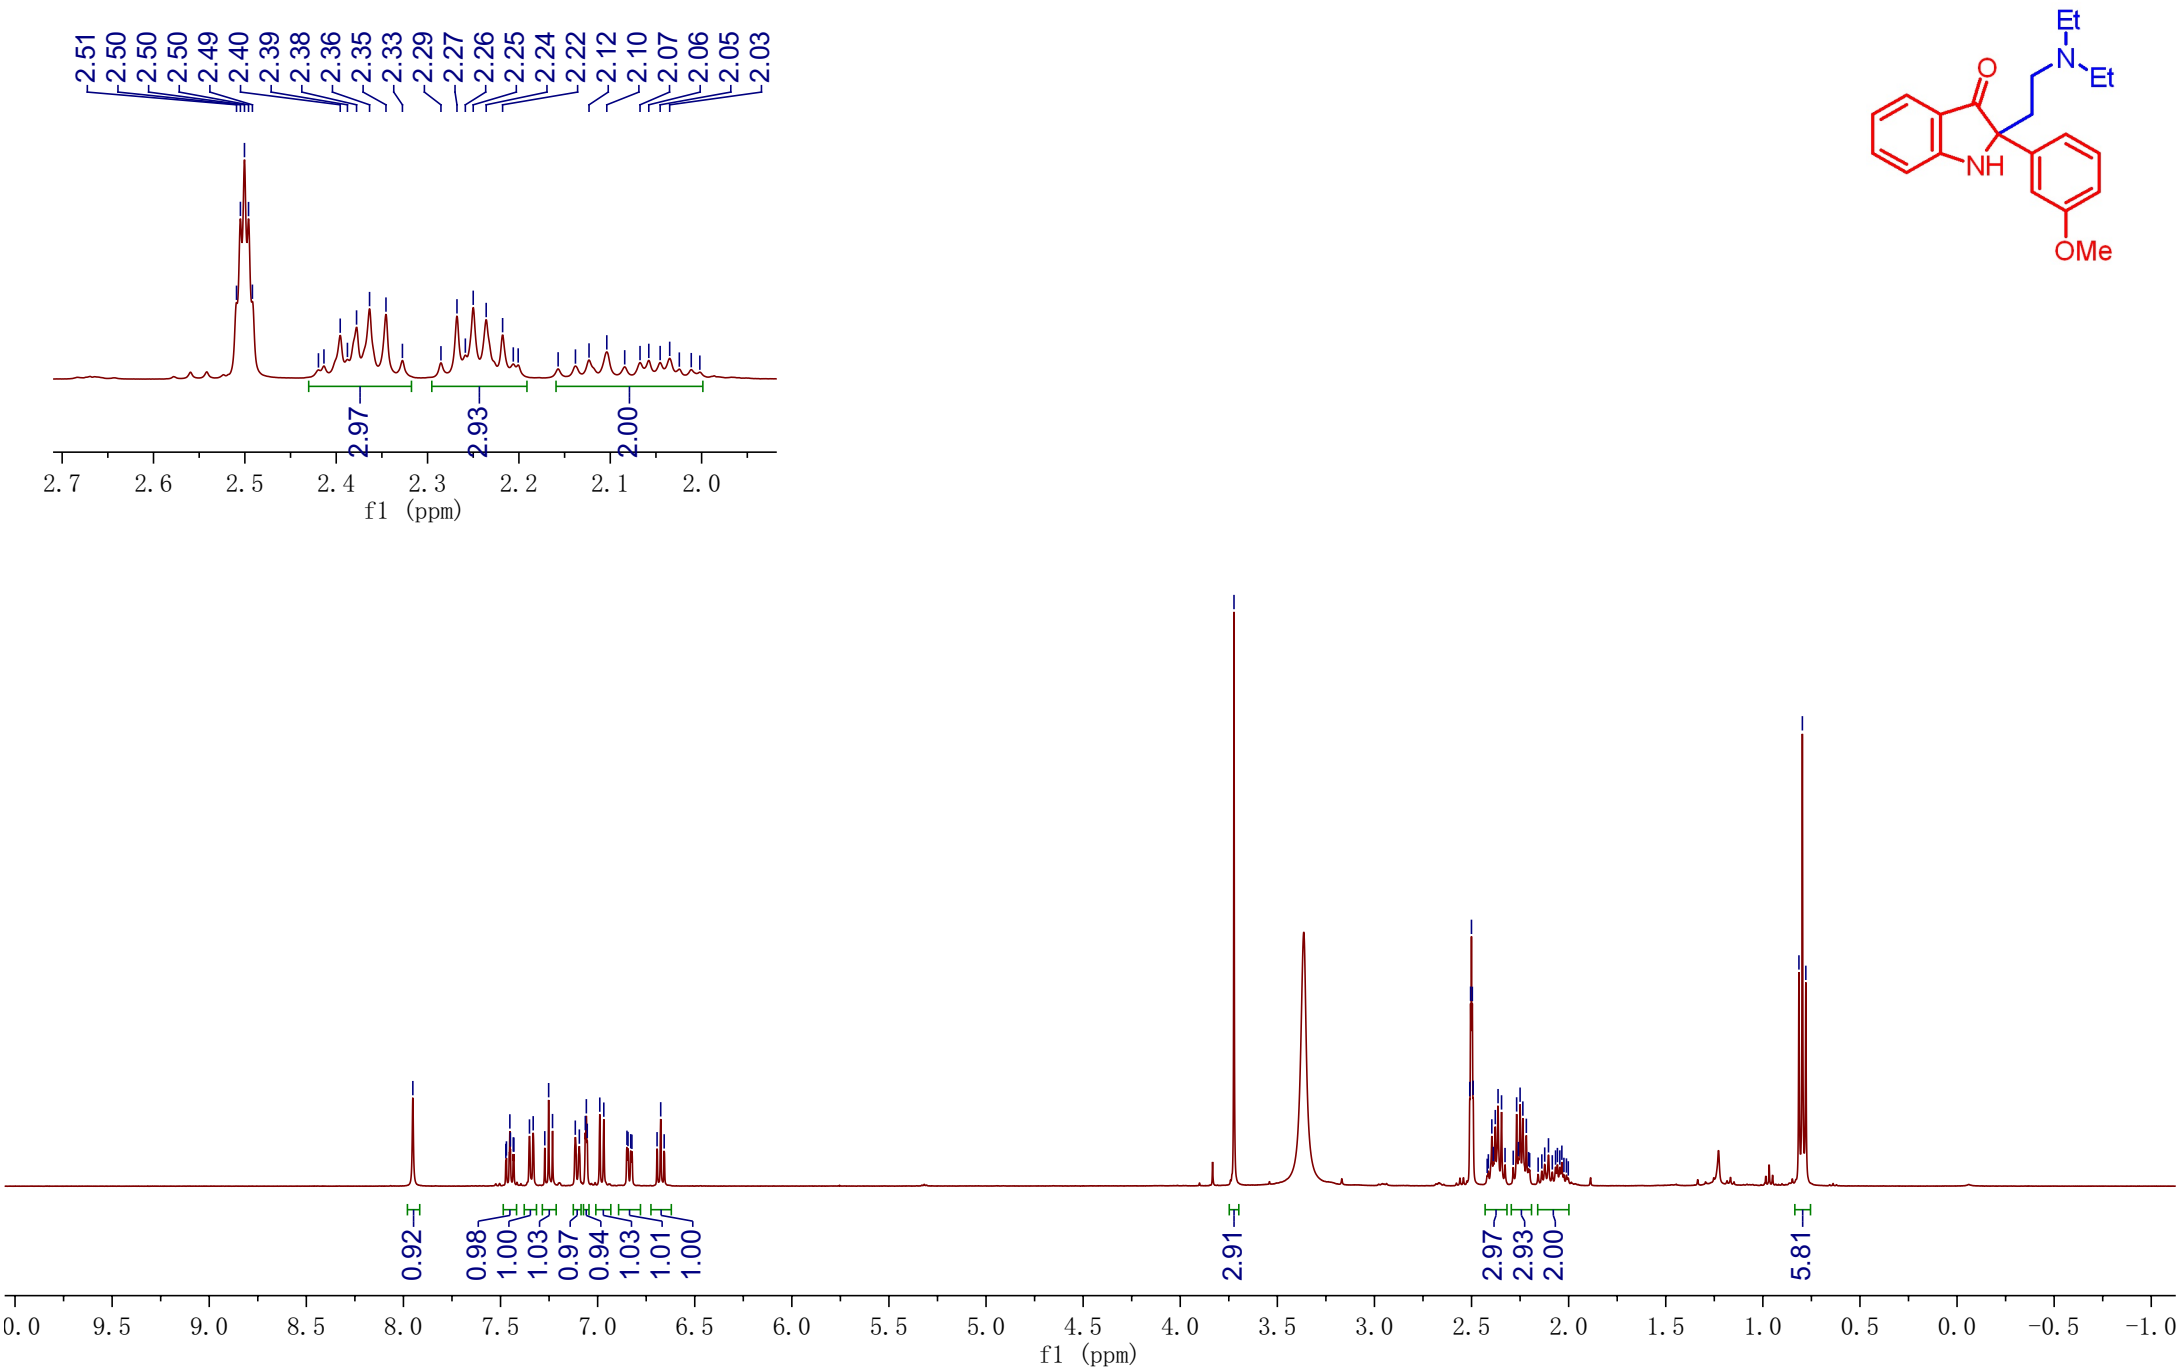

7.95  
7.47  
7.47  
7.45  
7.45  
7.43  
7.43  
7.35  
7.33  
7.27  
7.25  
7.23  
7.12  
7.09  
7.06  
7.06  
7.05  
6.99  
6.97  
6.85  
6.84  
6.83  
6.82  
6.69  
6.68  
6.66

3.72  
2.51  
2.50  
2.50  
2.50  
2.49  
2.40  
2.38  
2.36  
2.35  
2.27  
2.26  
2.25  
2.24  
2.22  
2.10  
2.03  
0.81  
0.80  
0.78

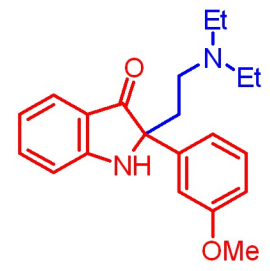



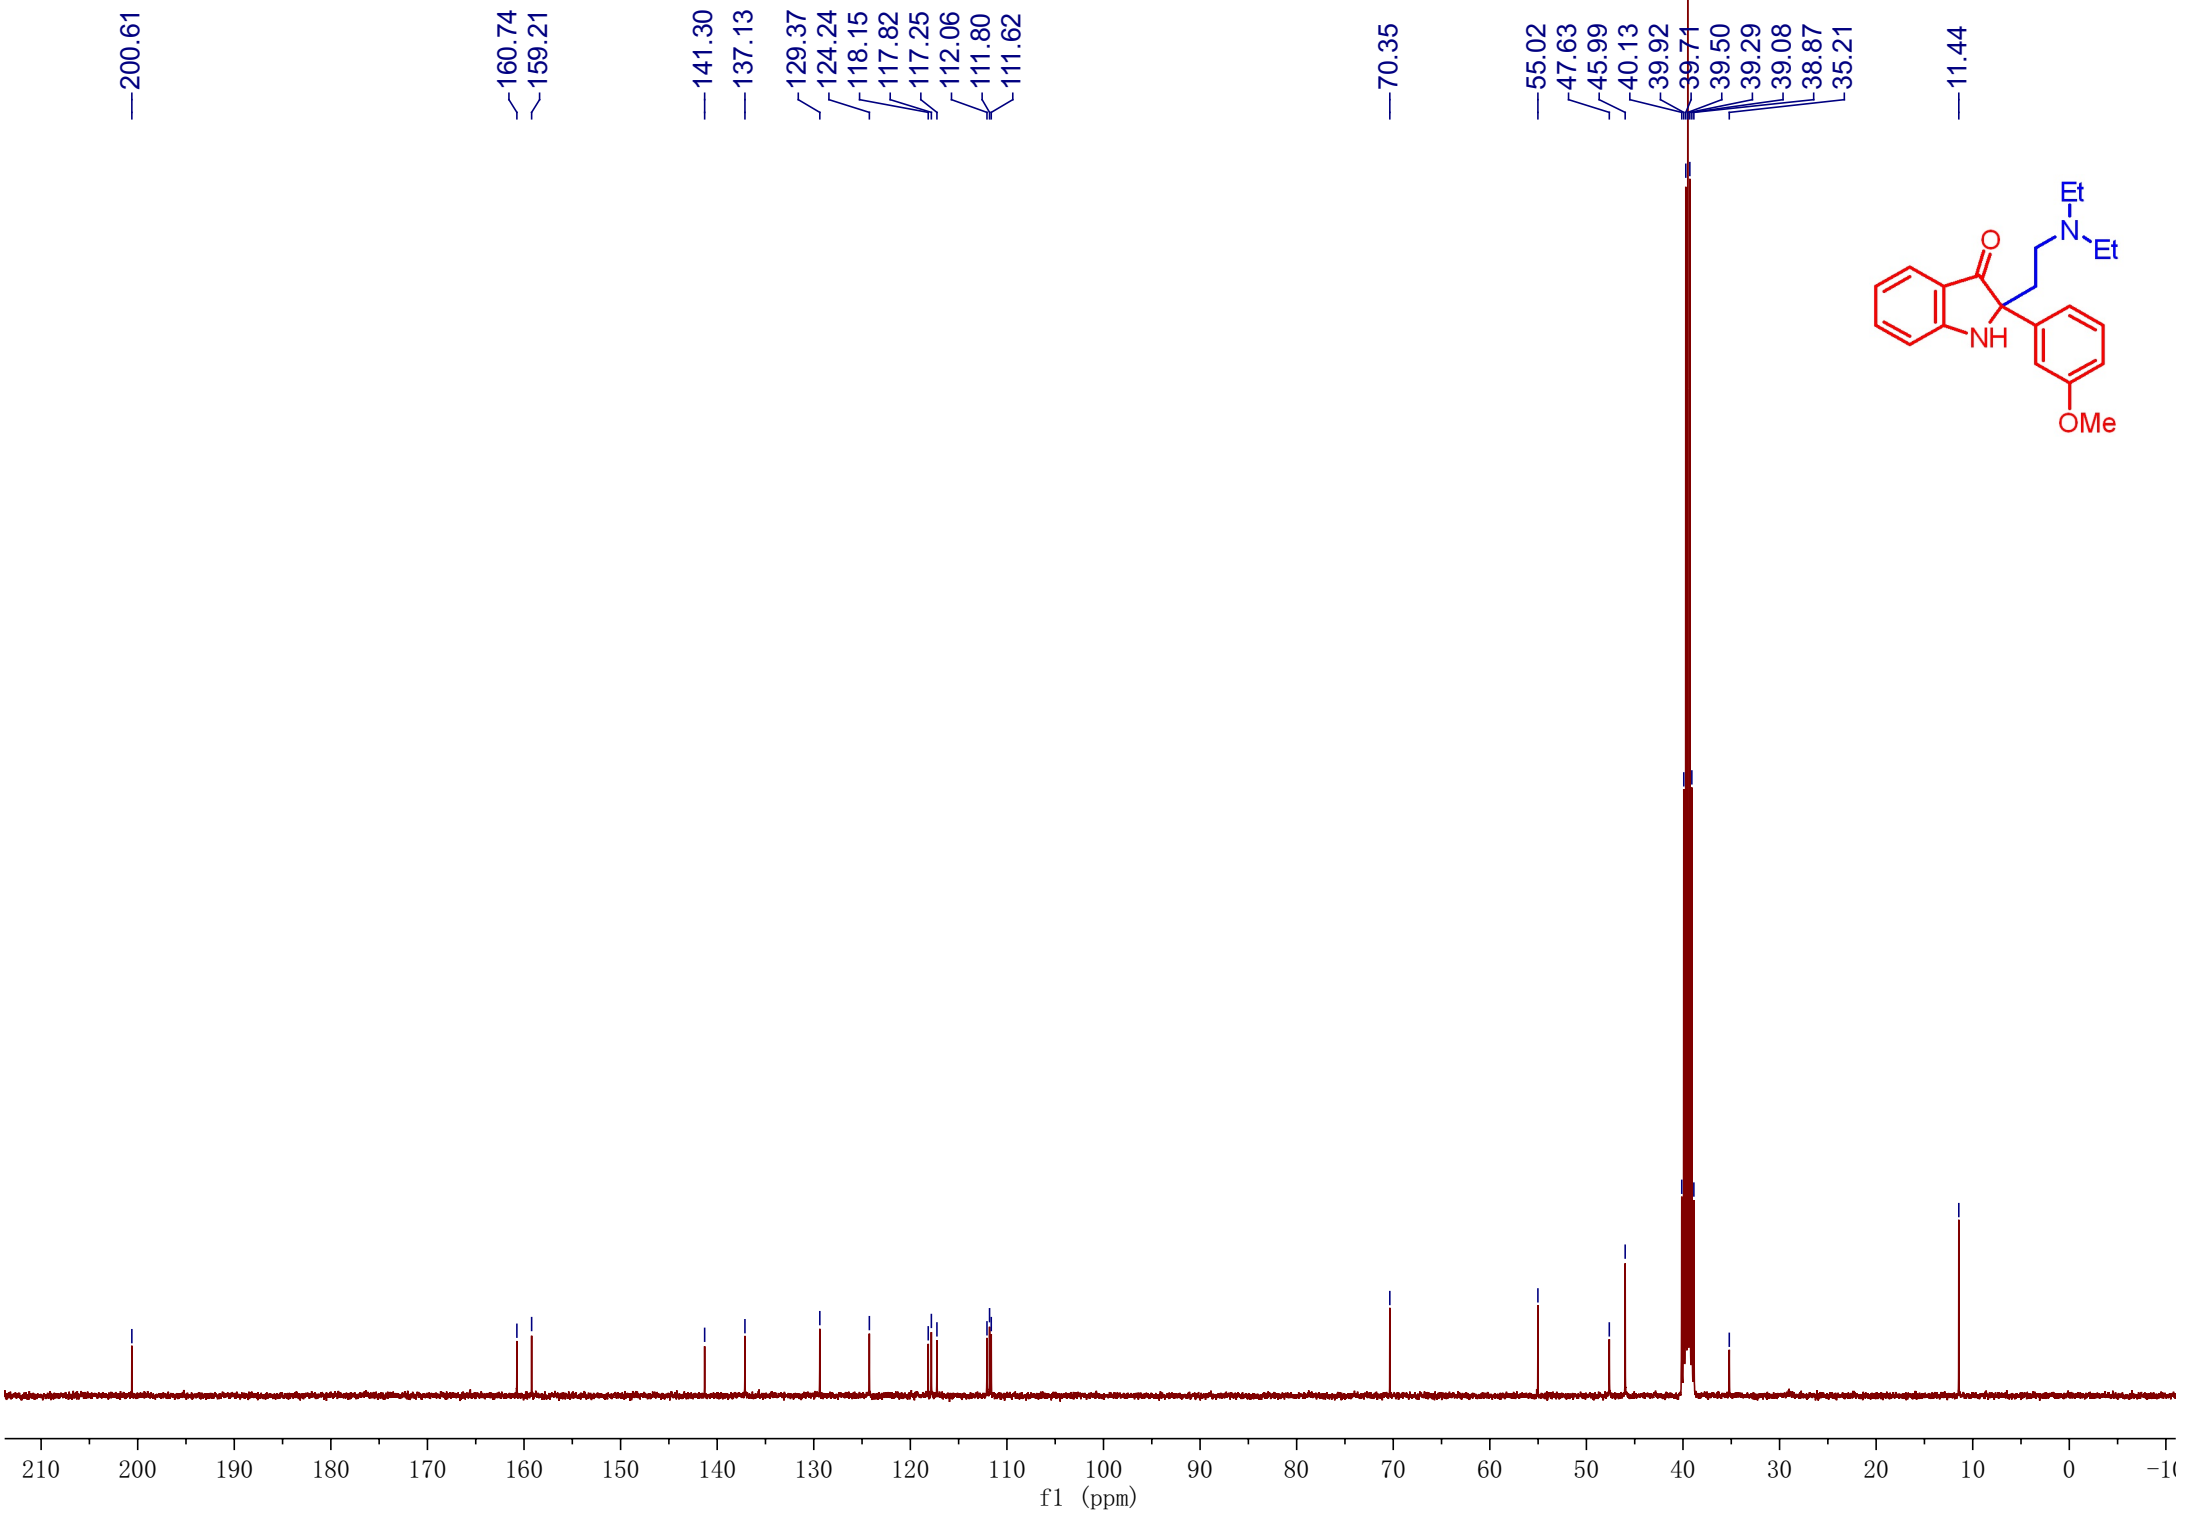

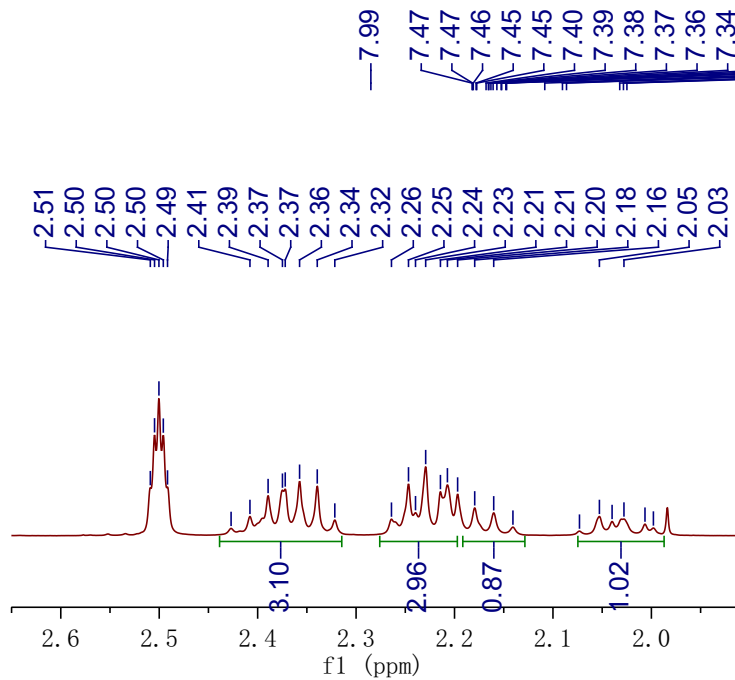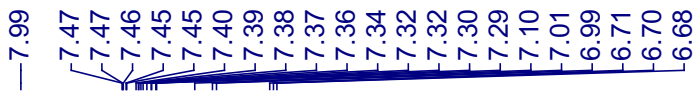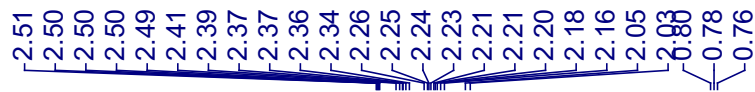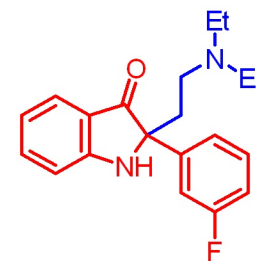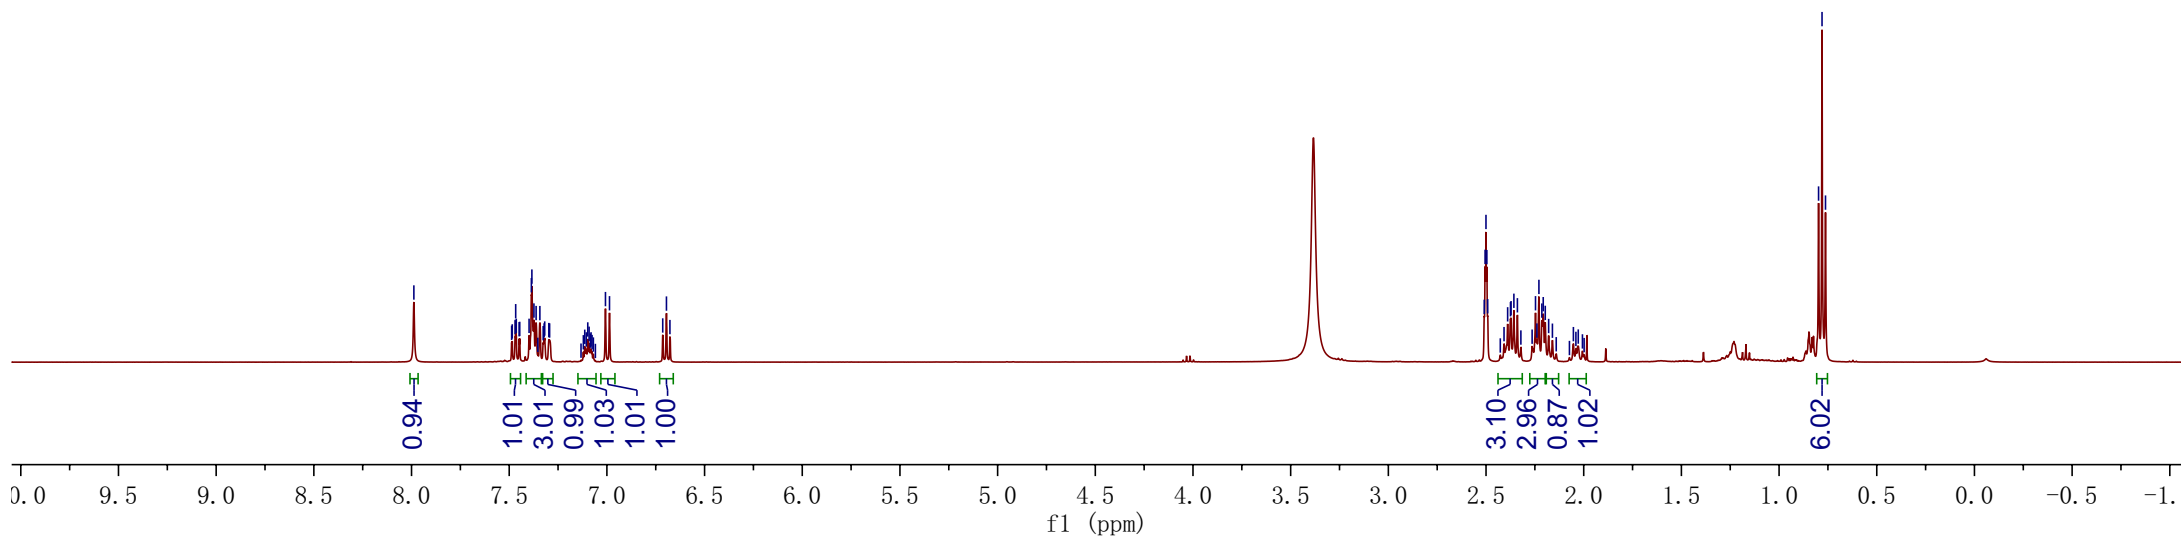

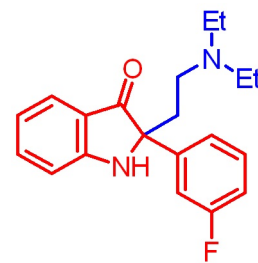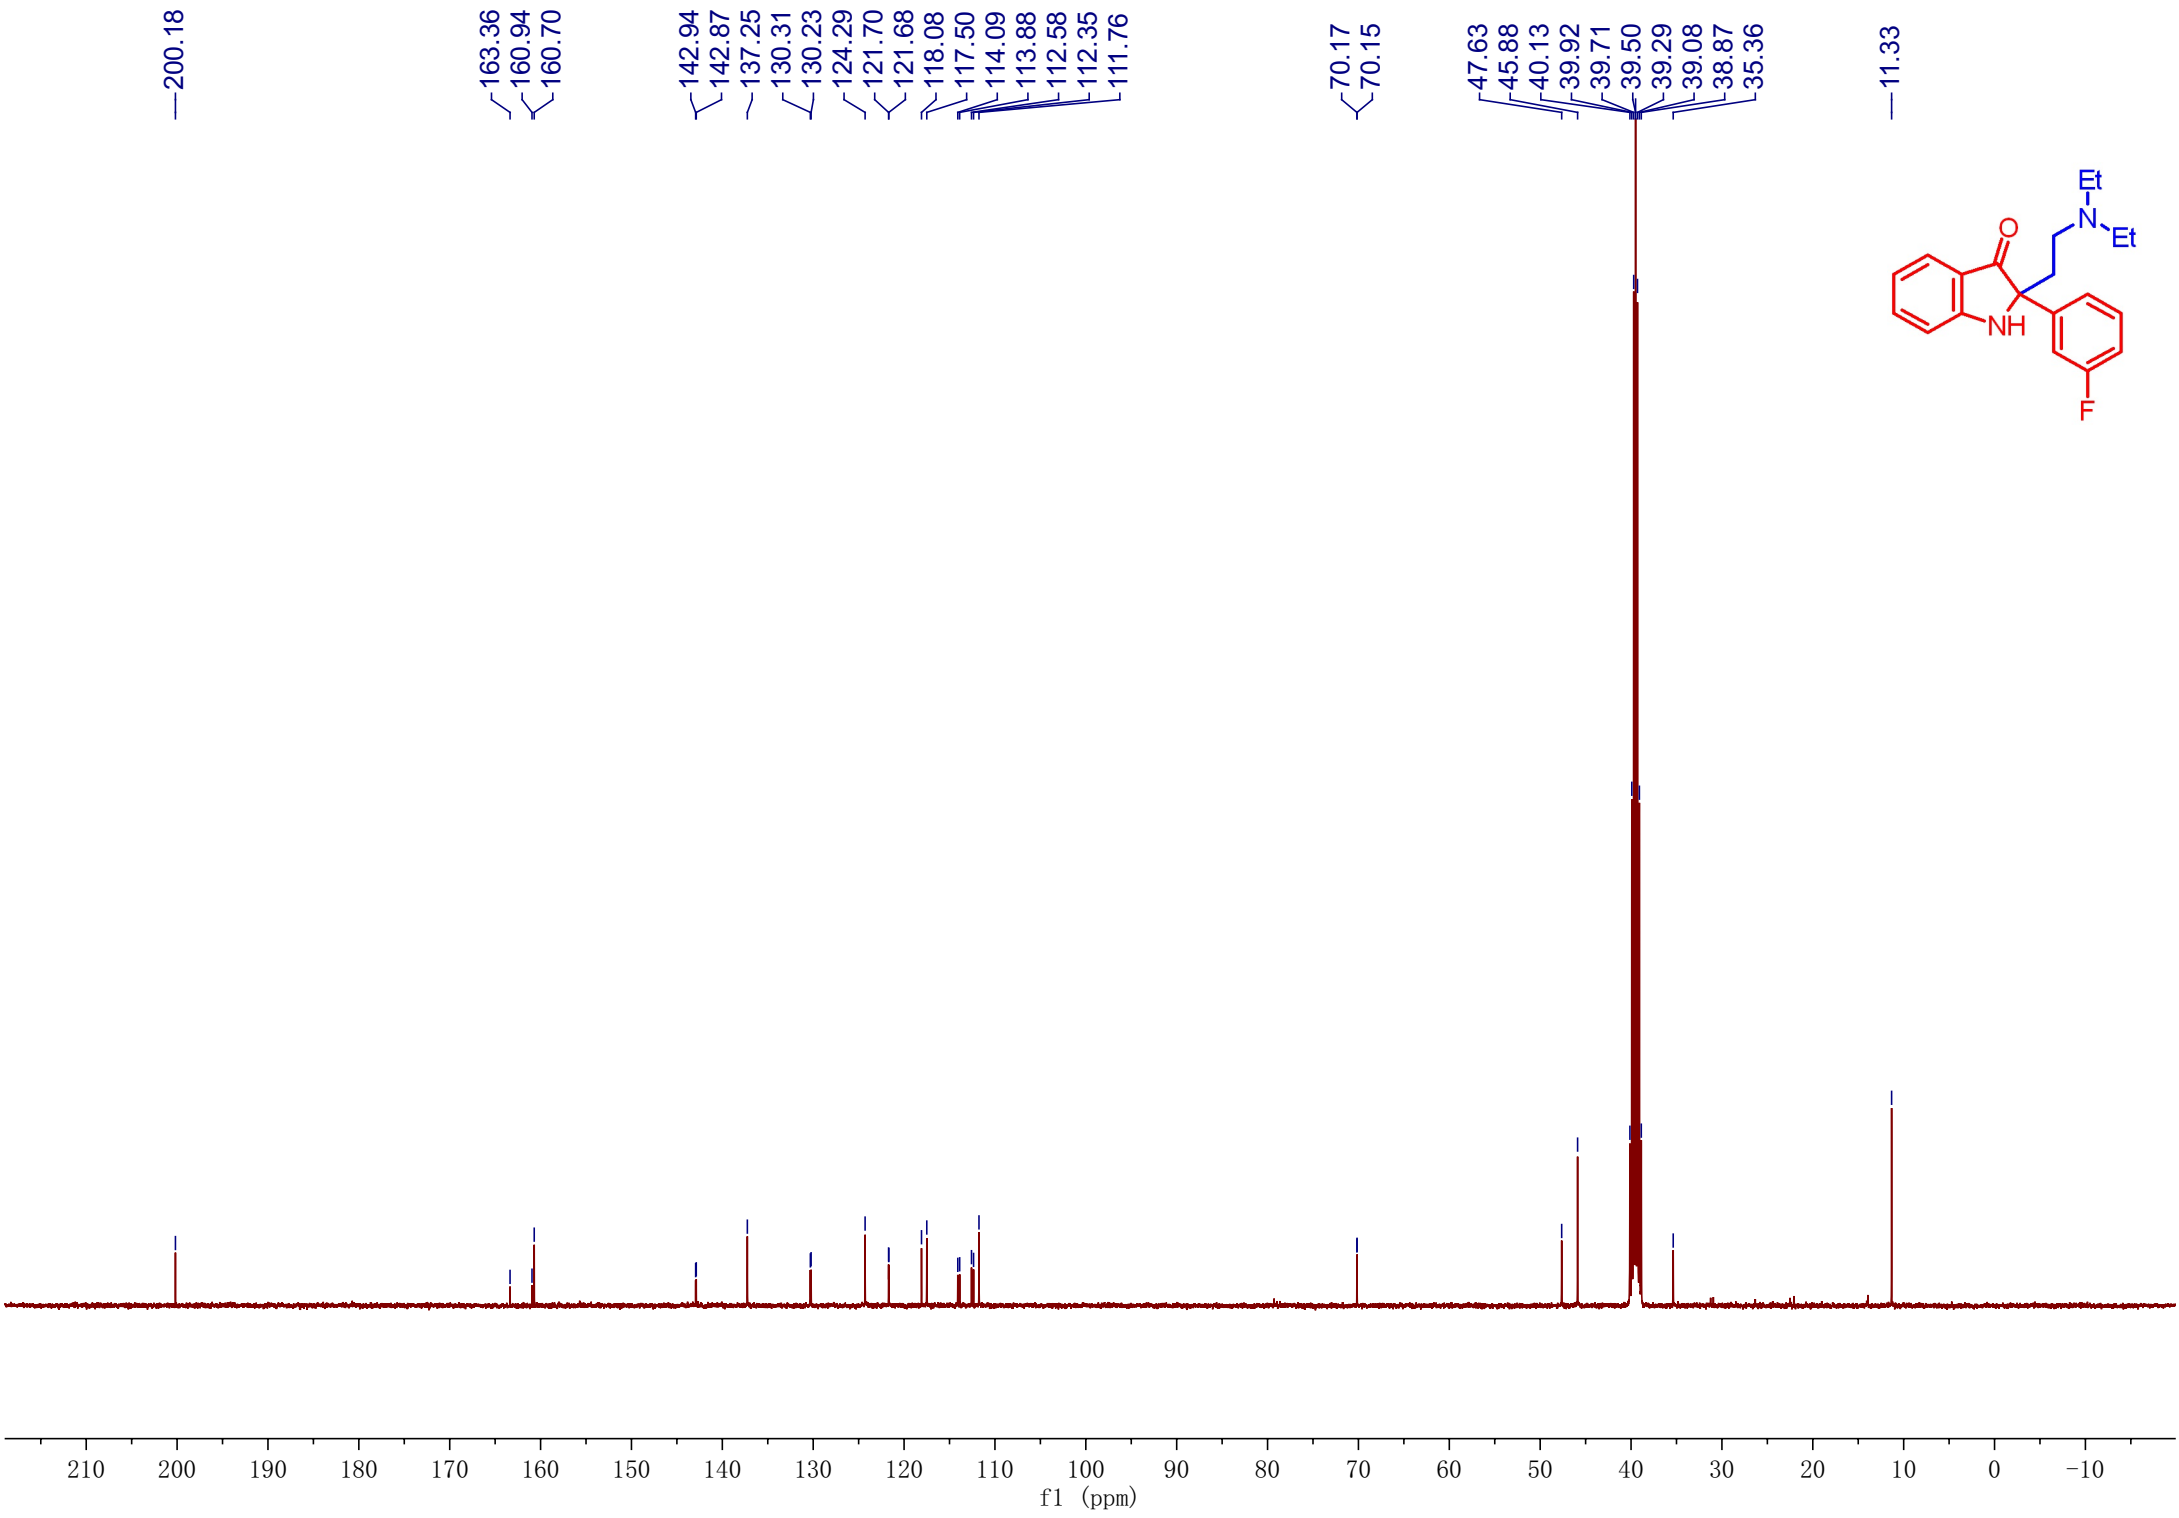

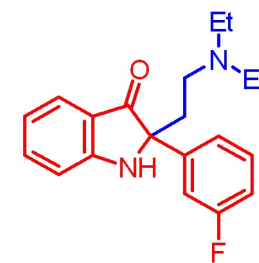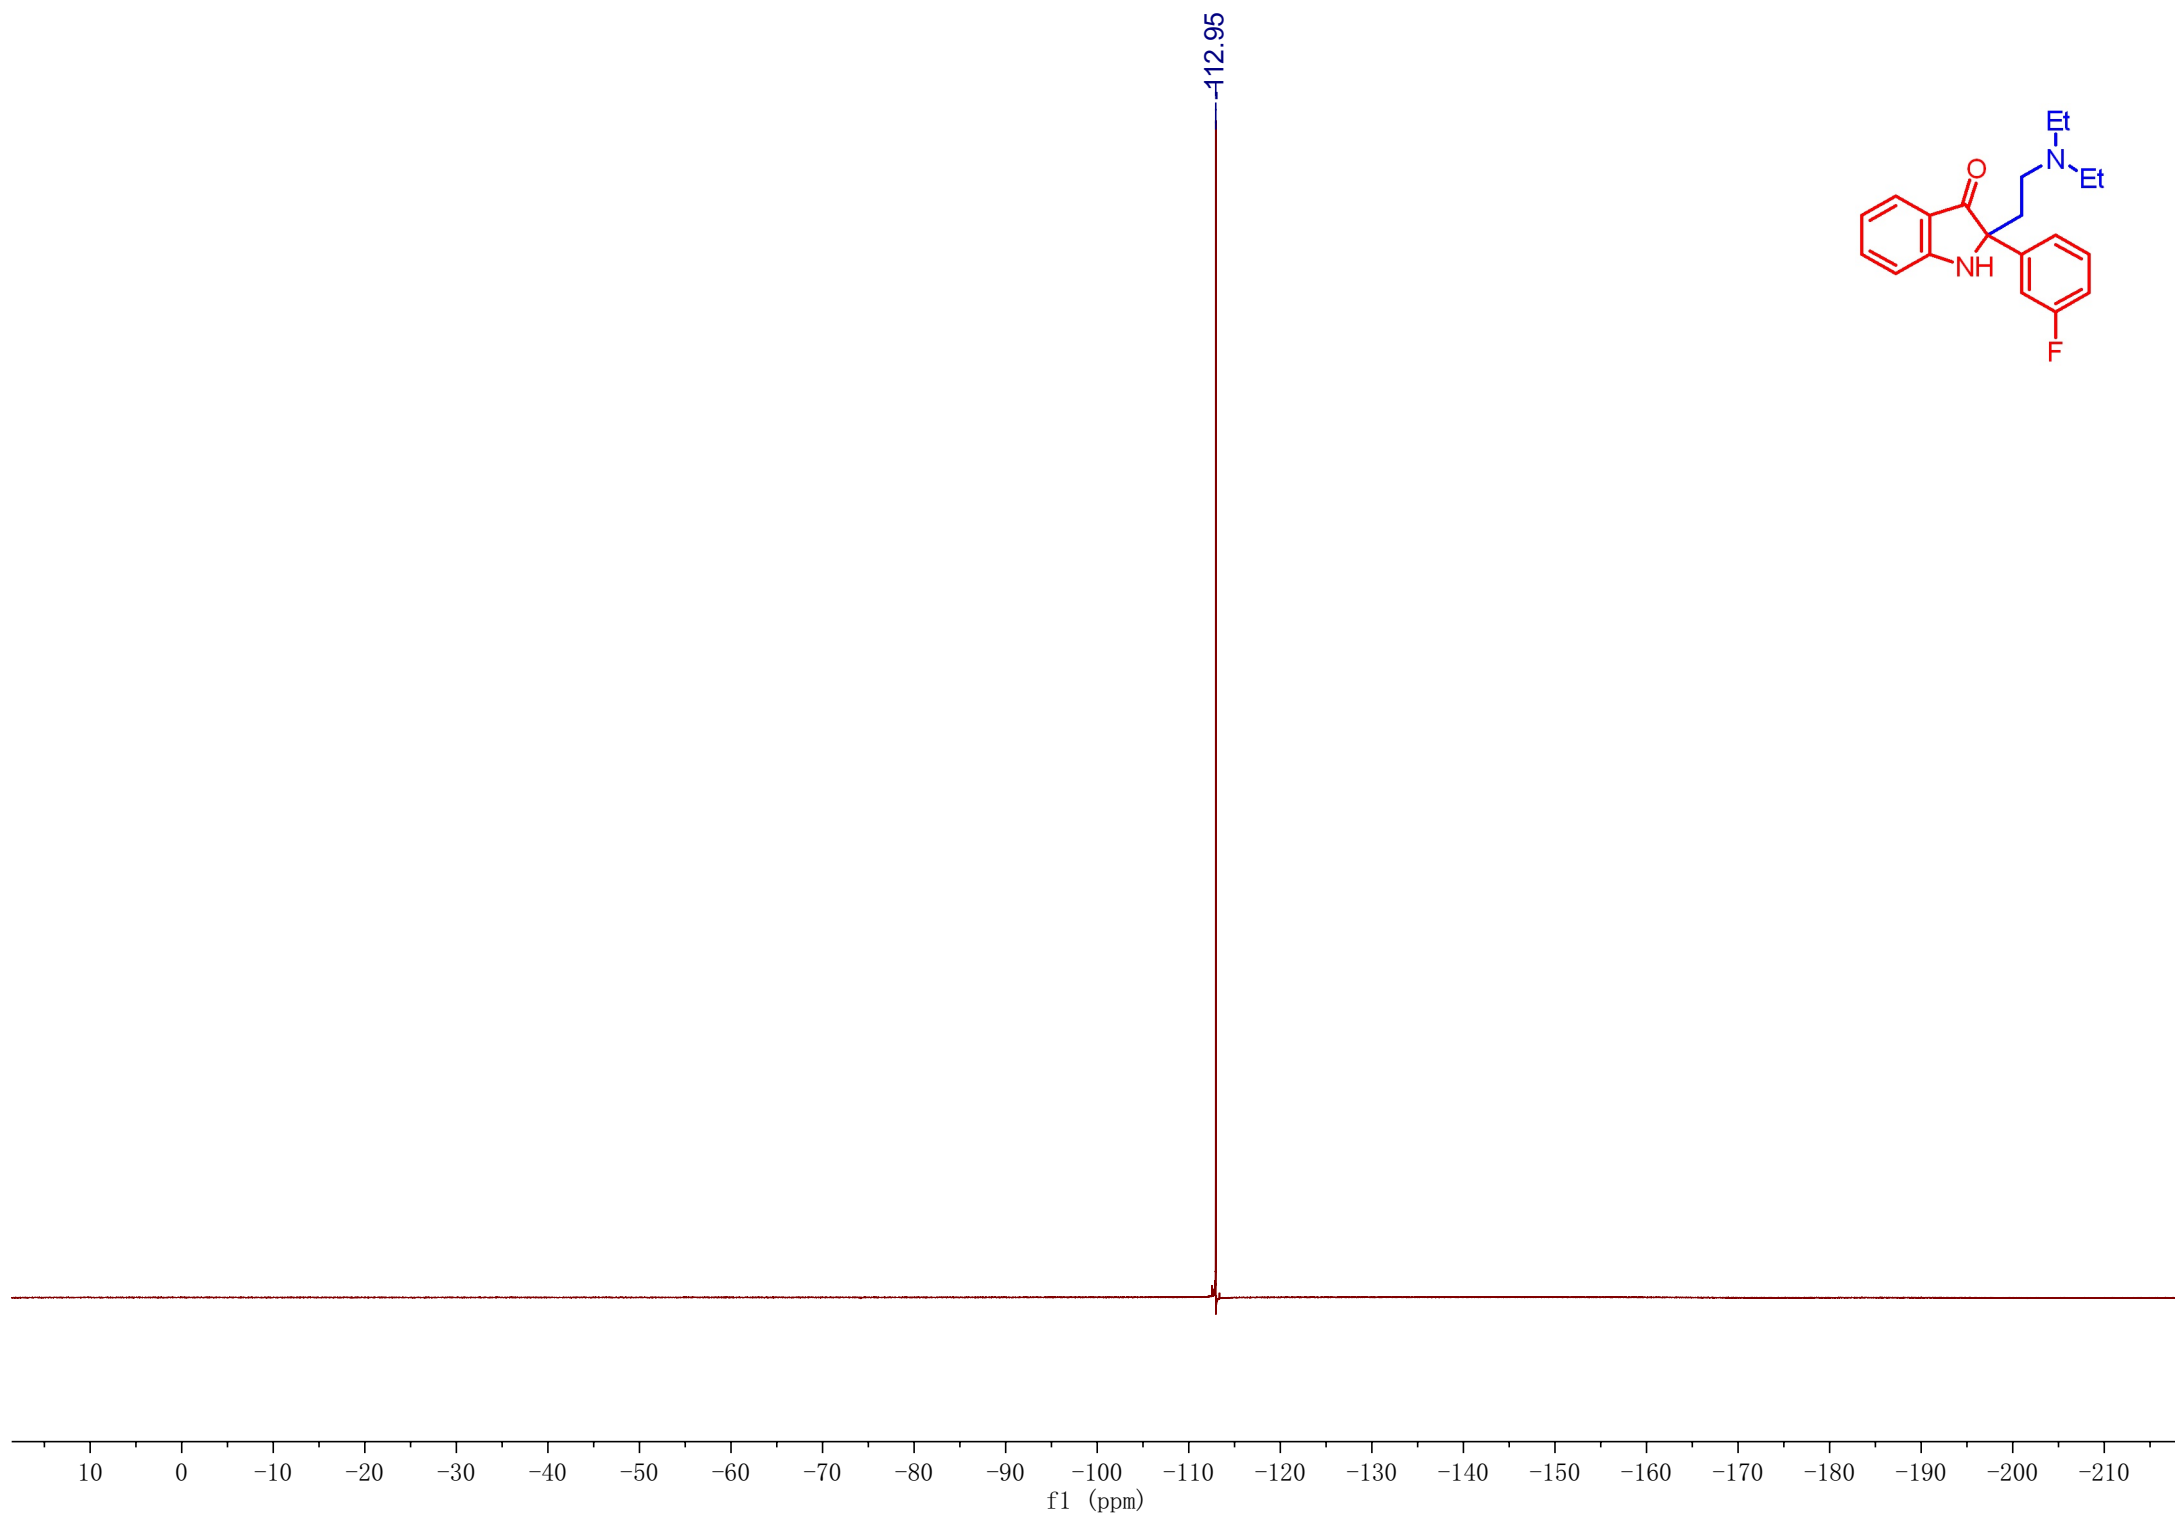

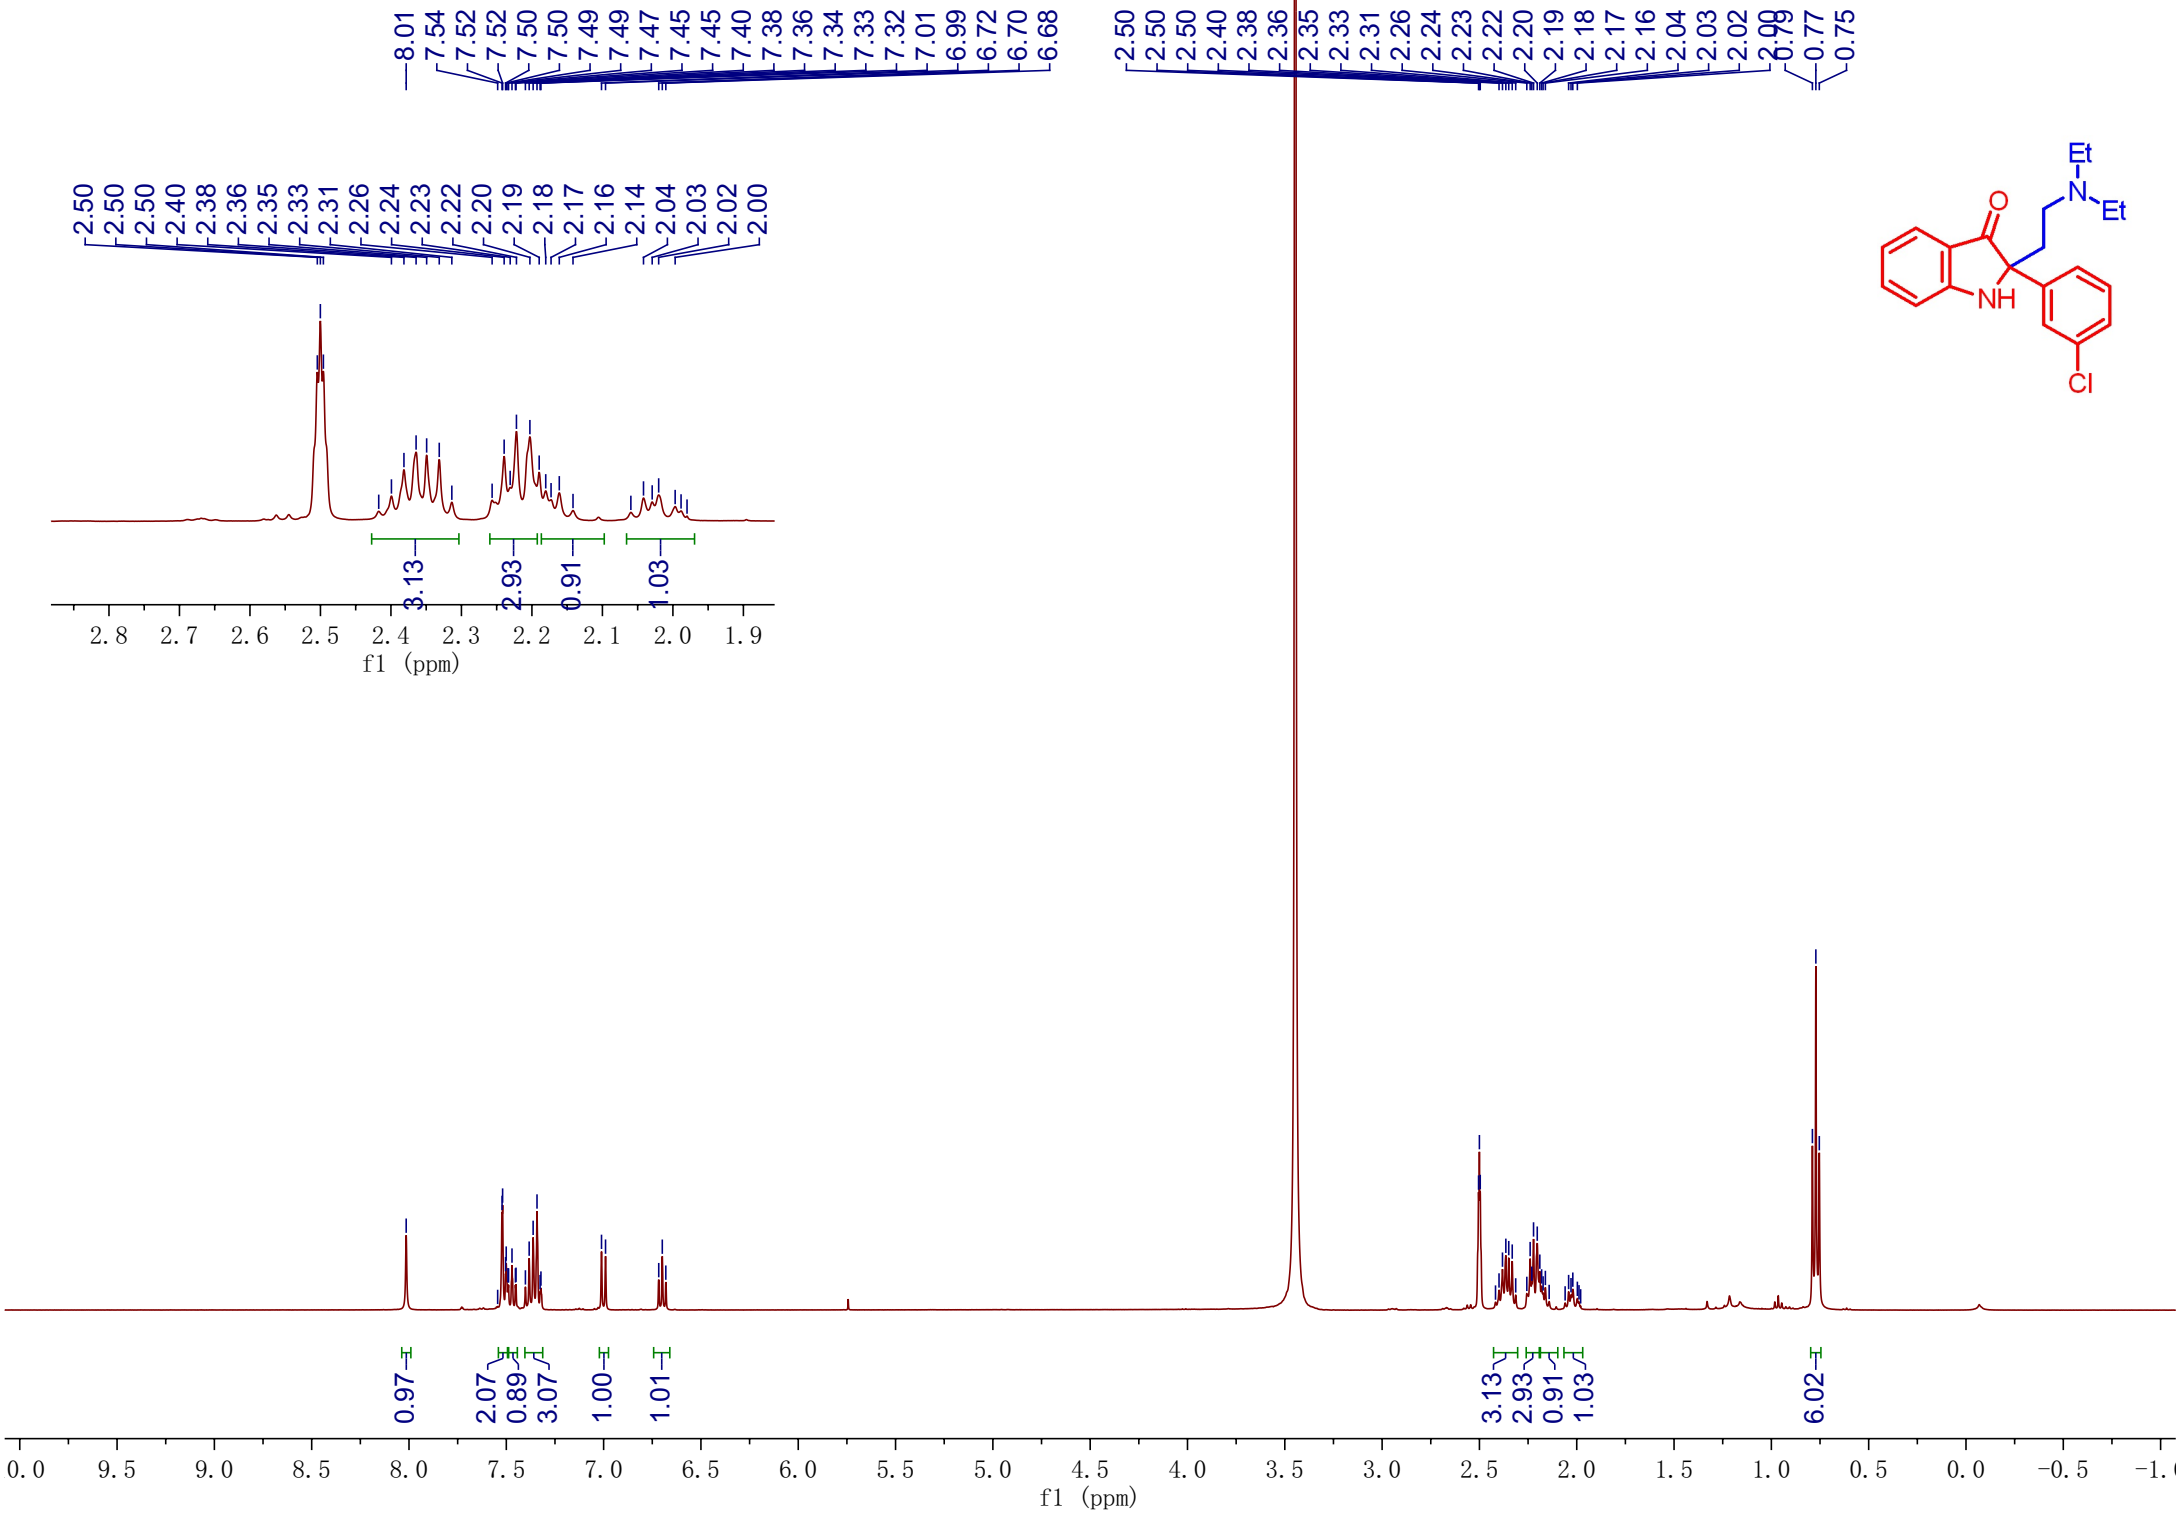

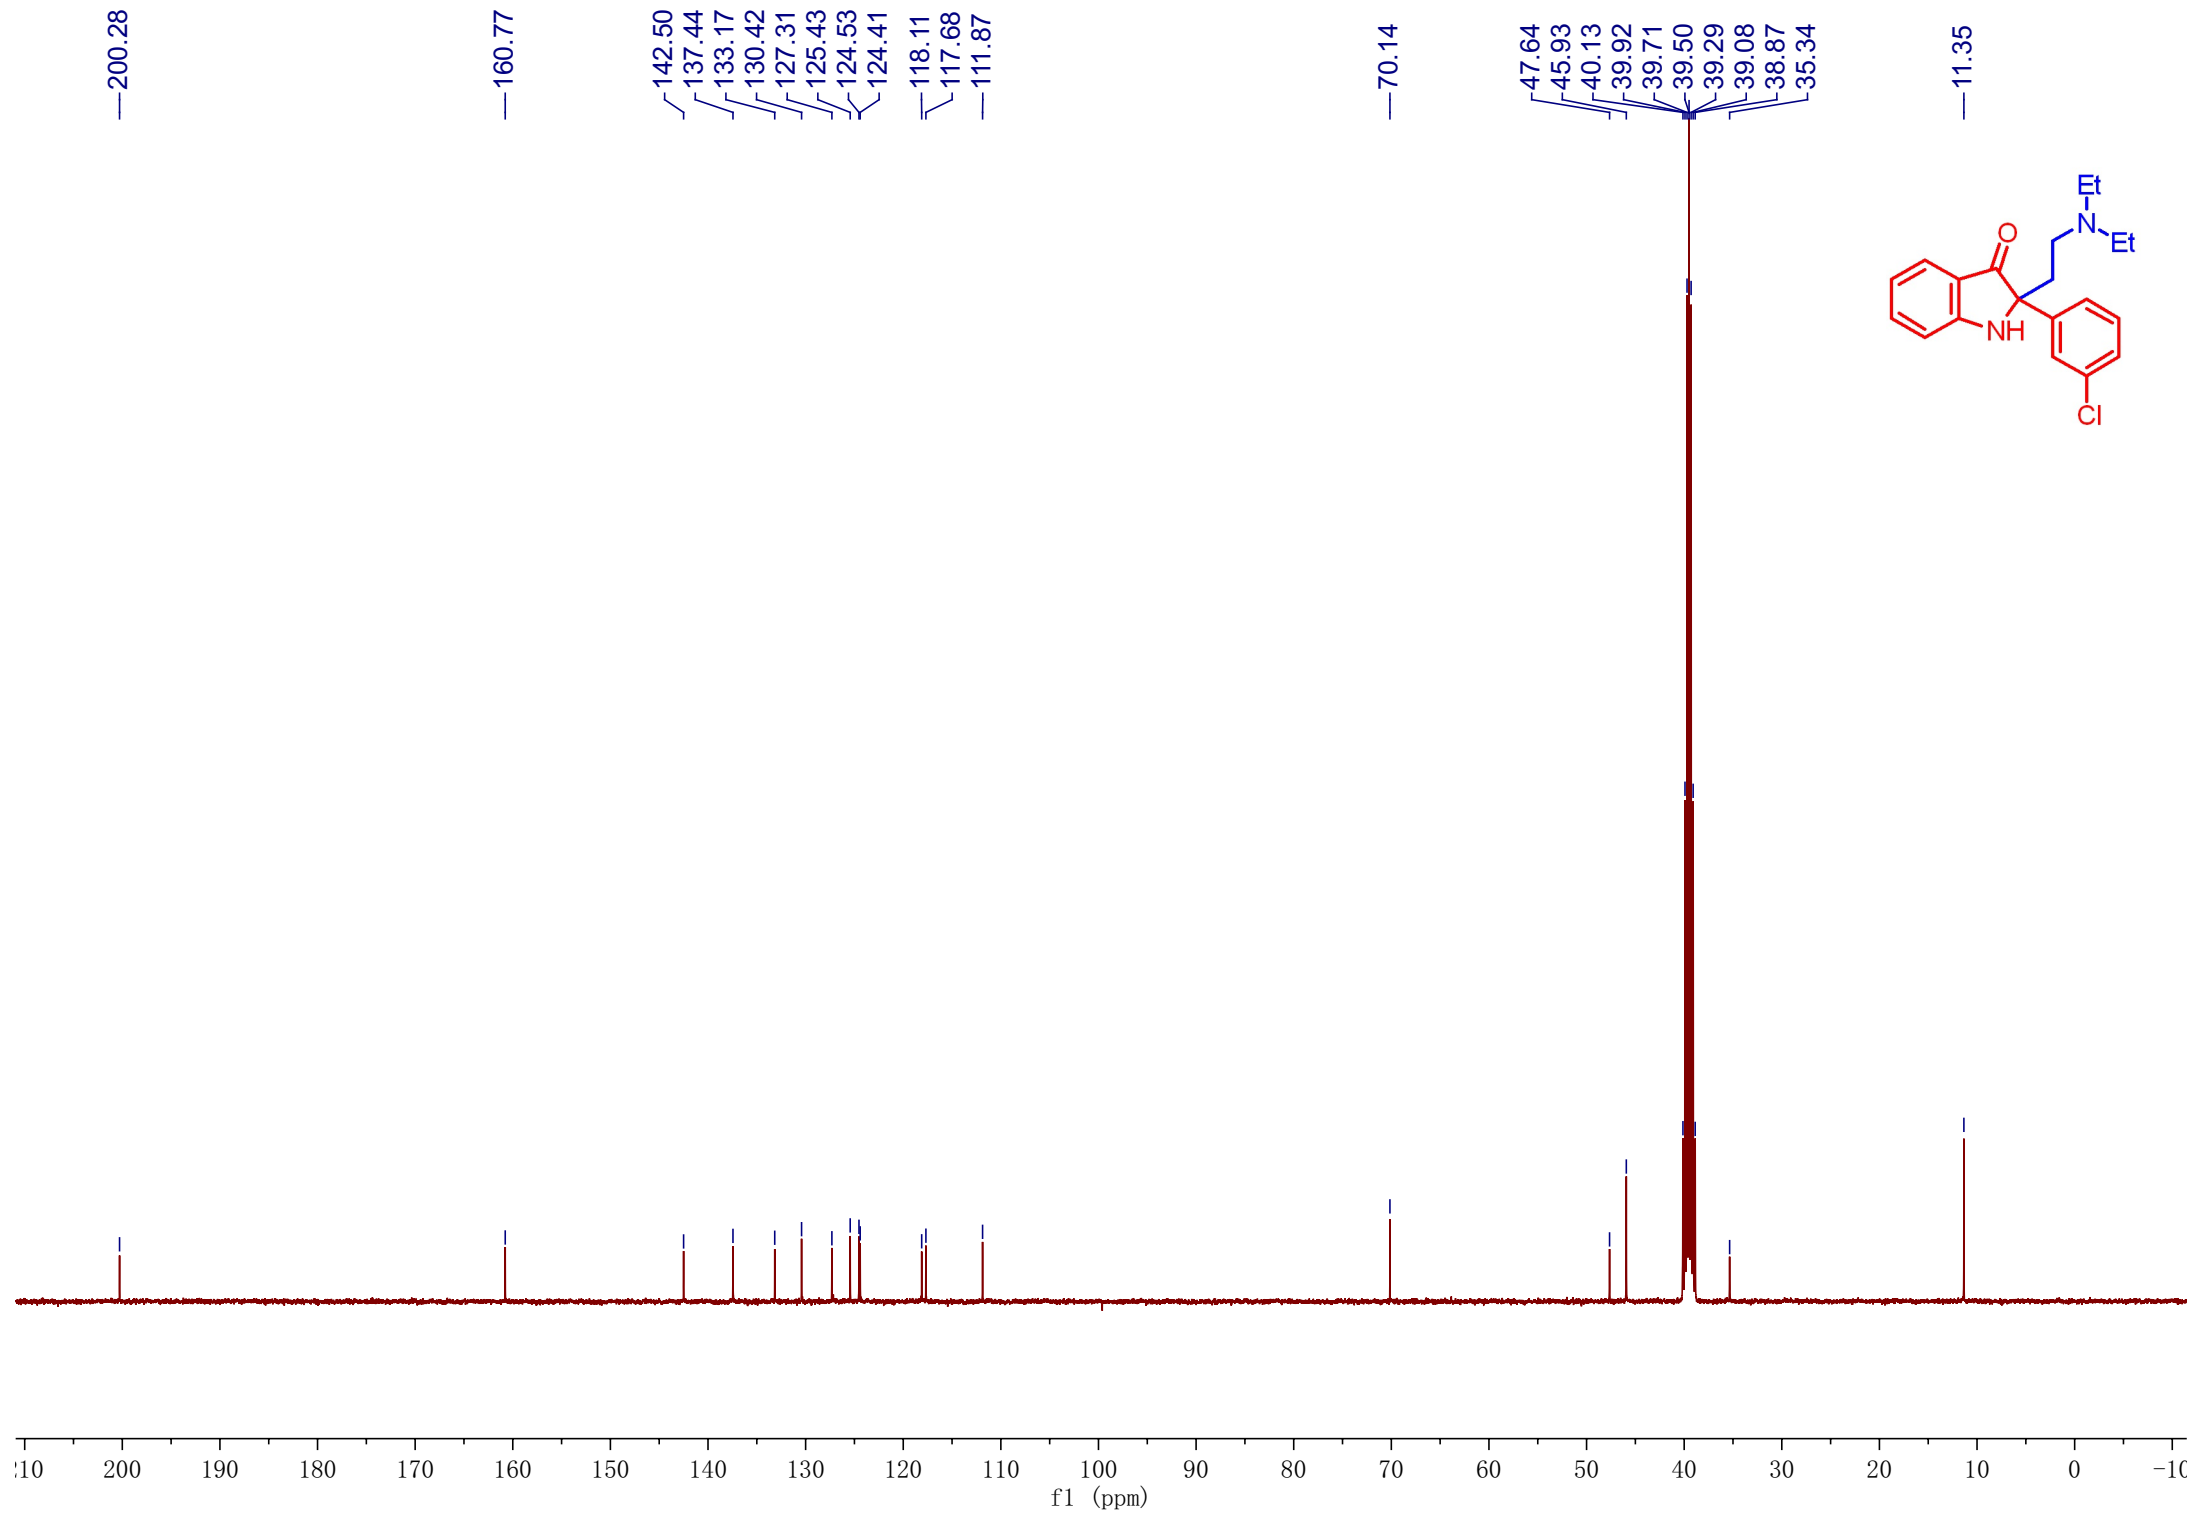

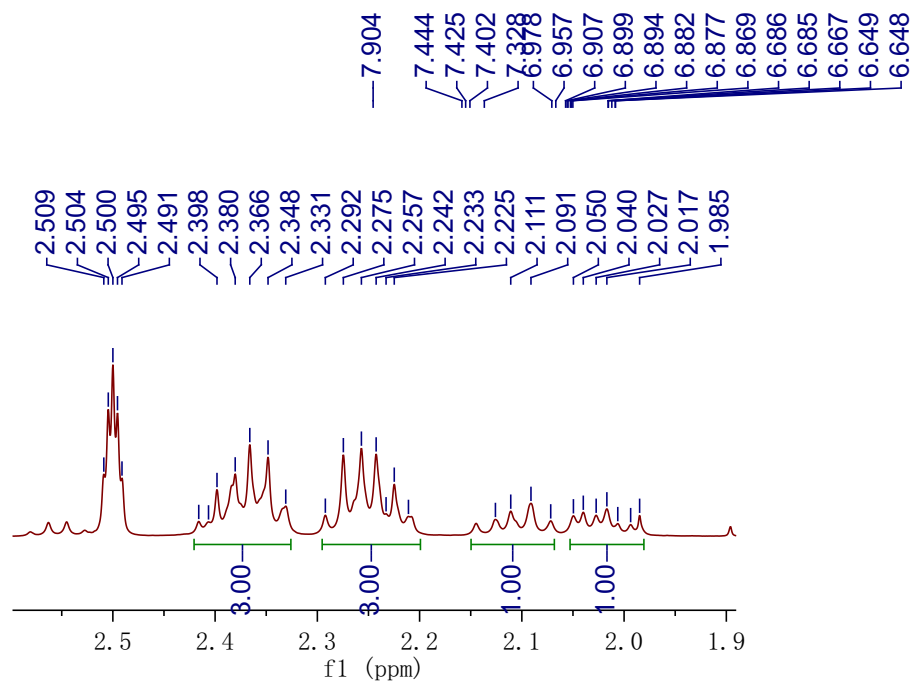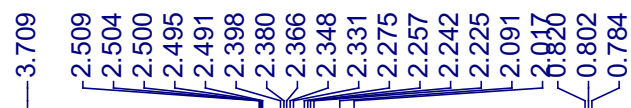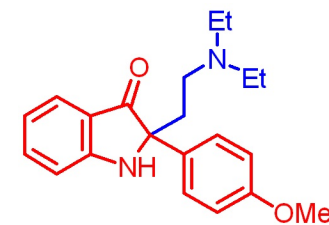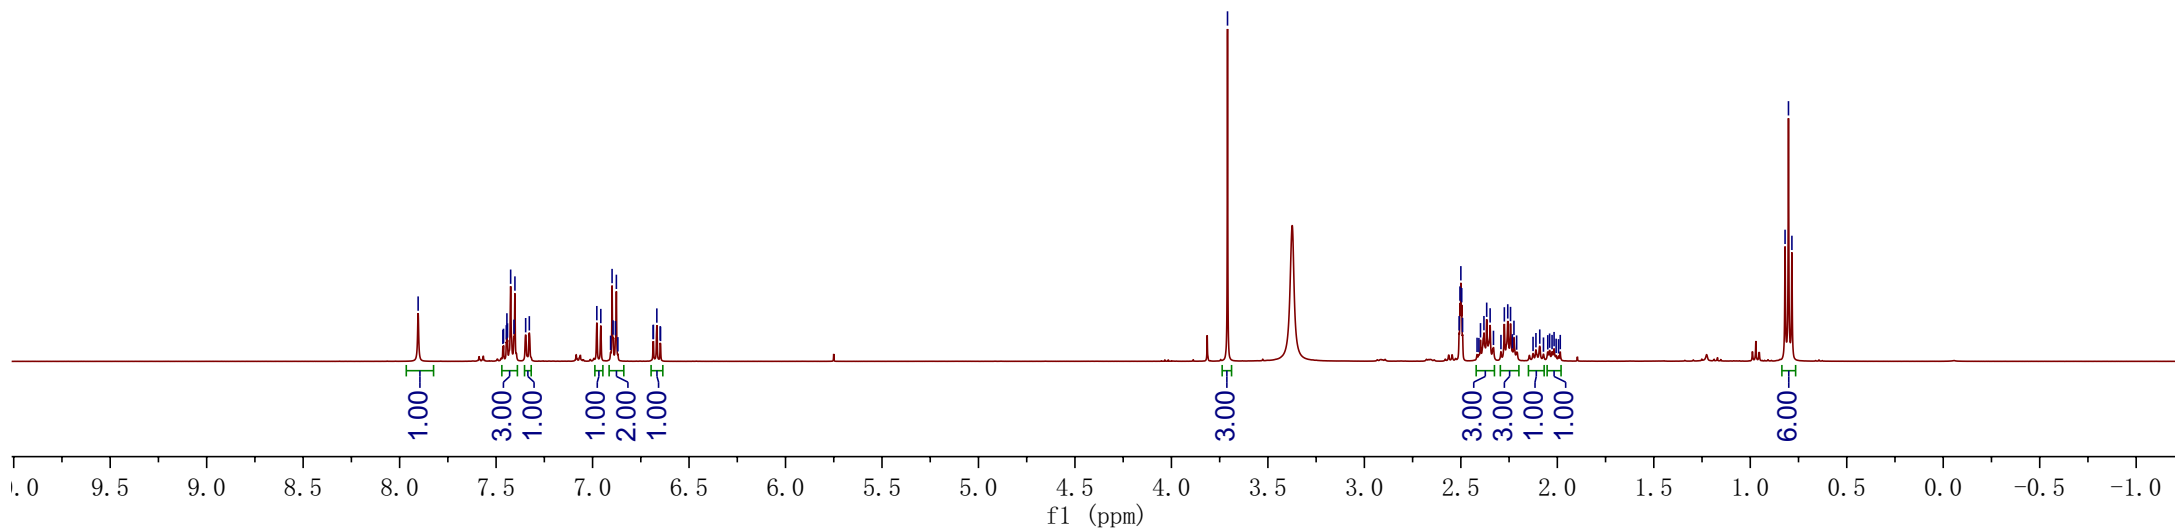

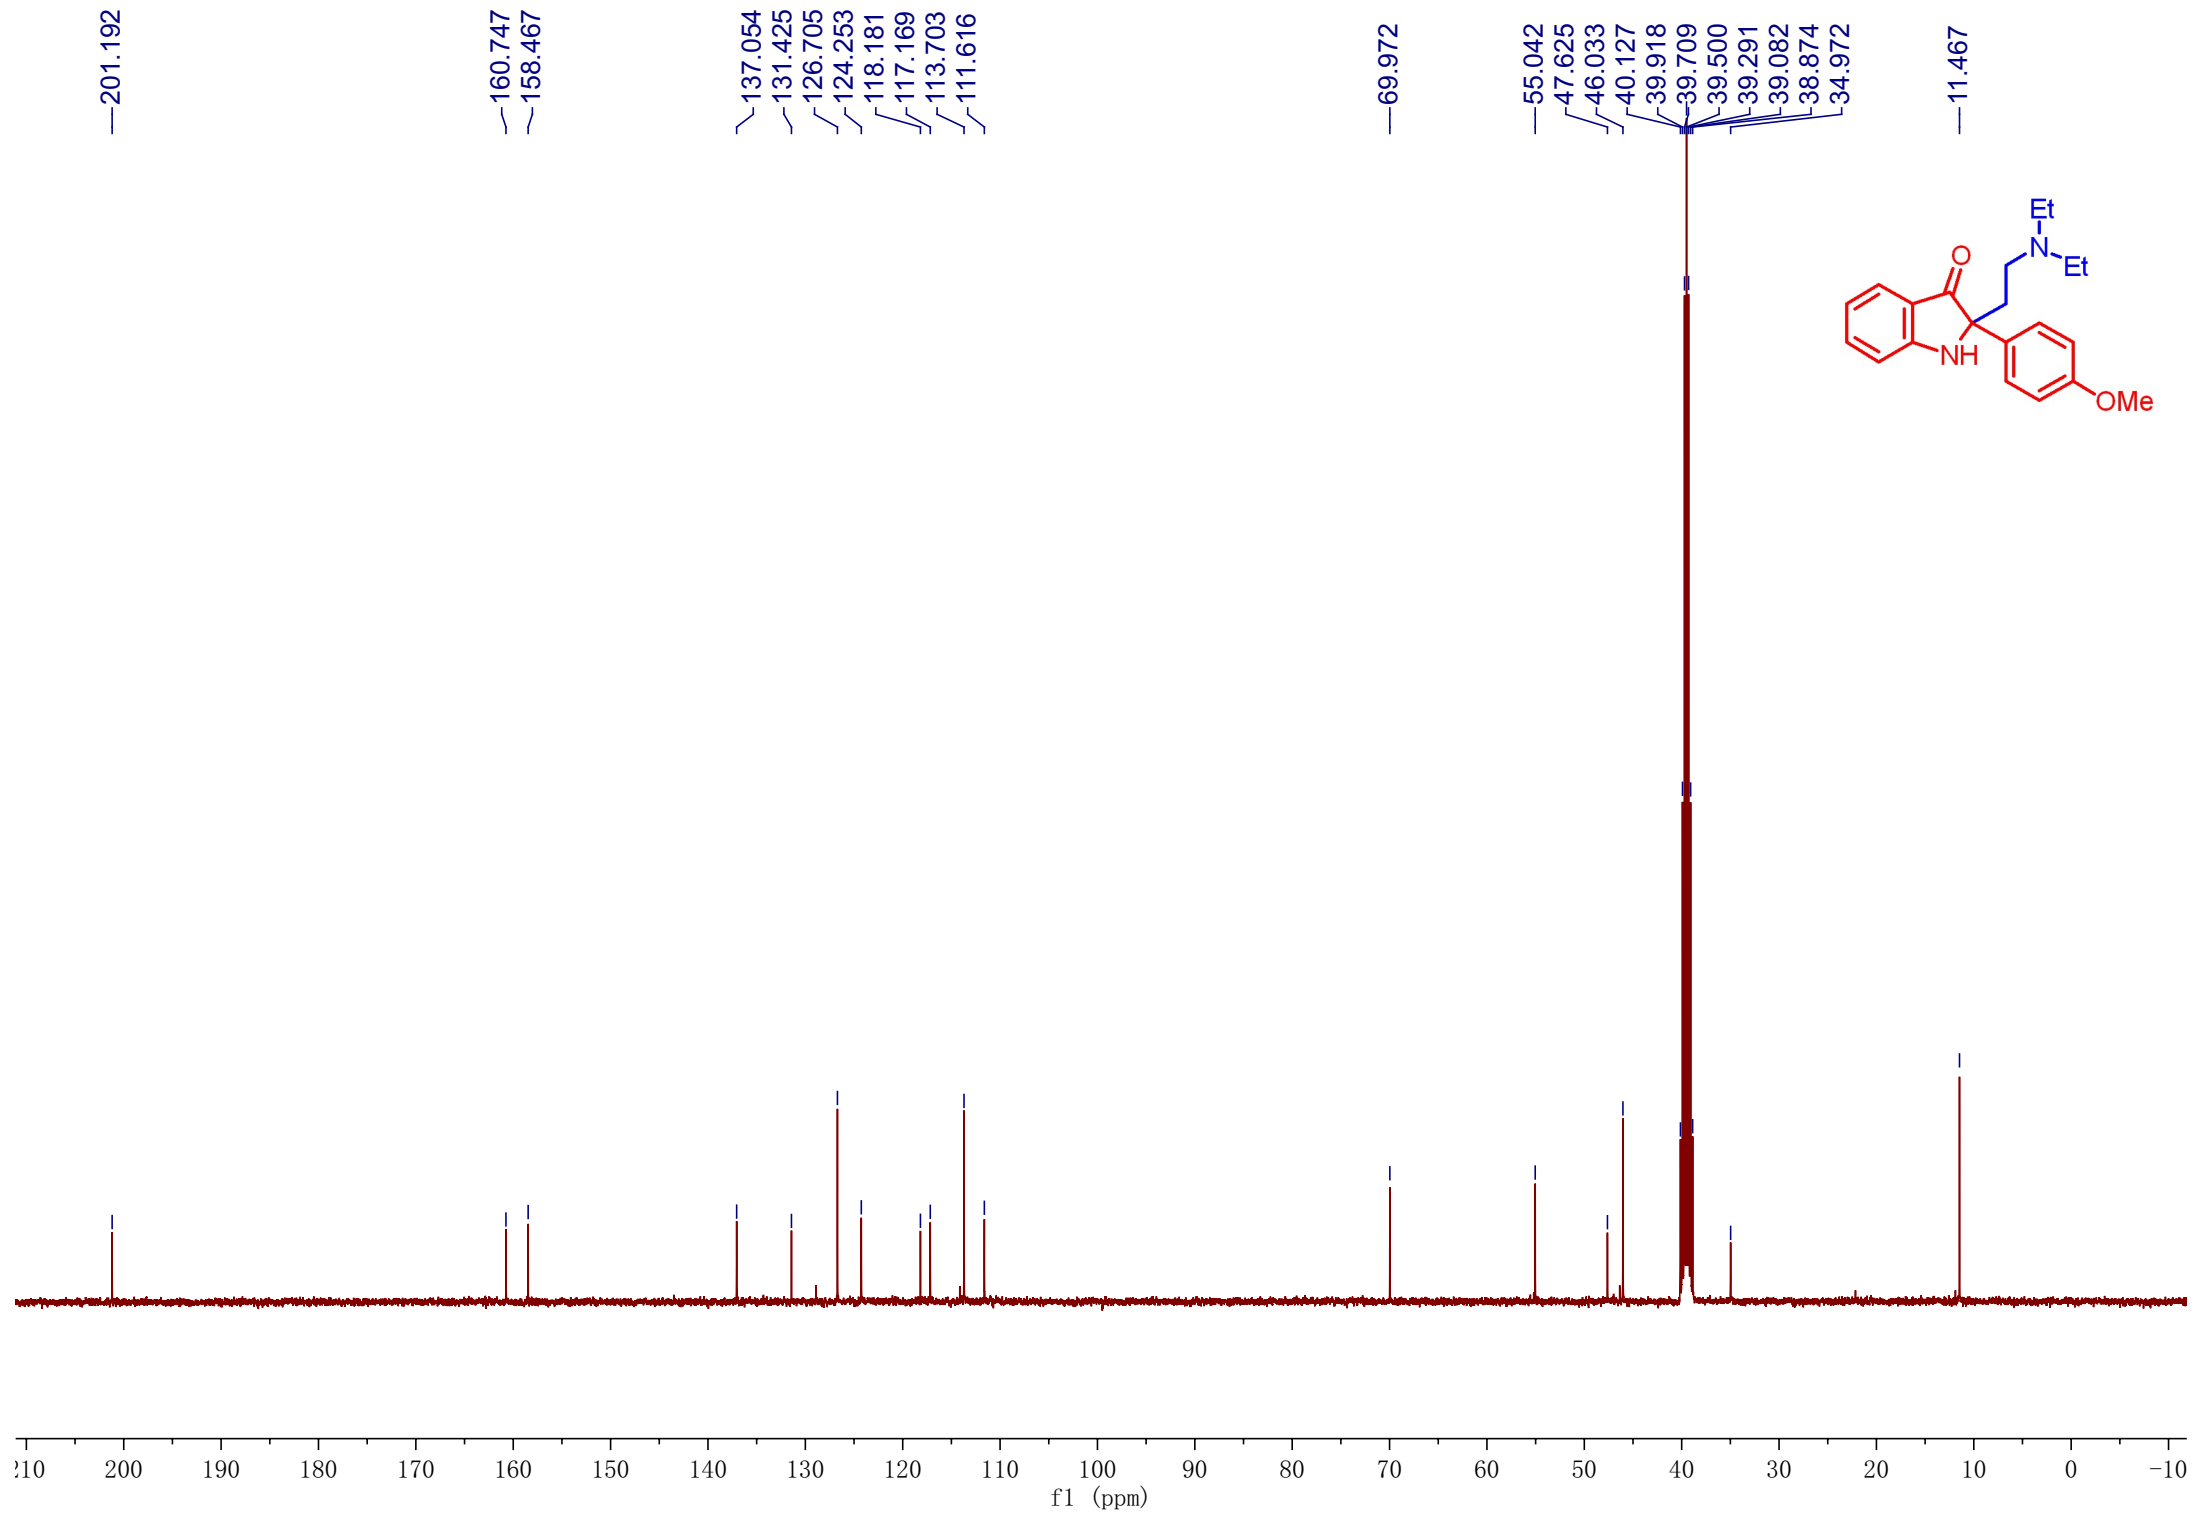





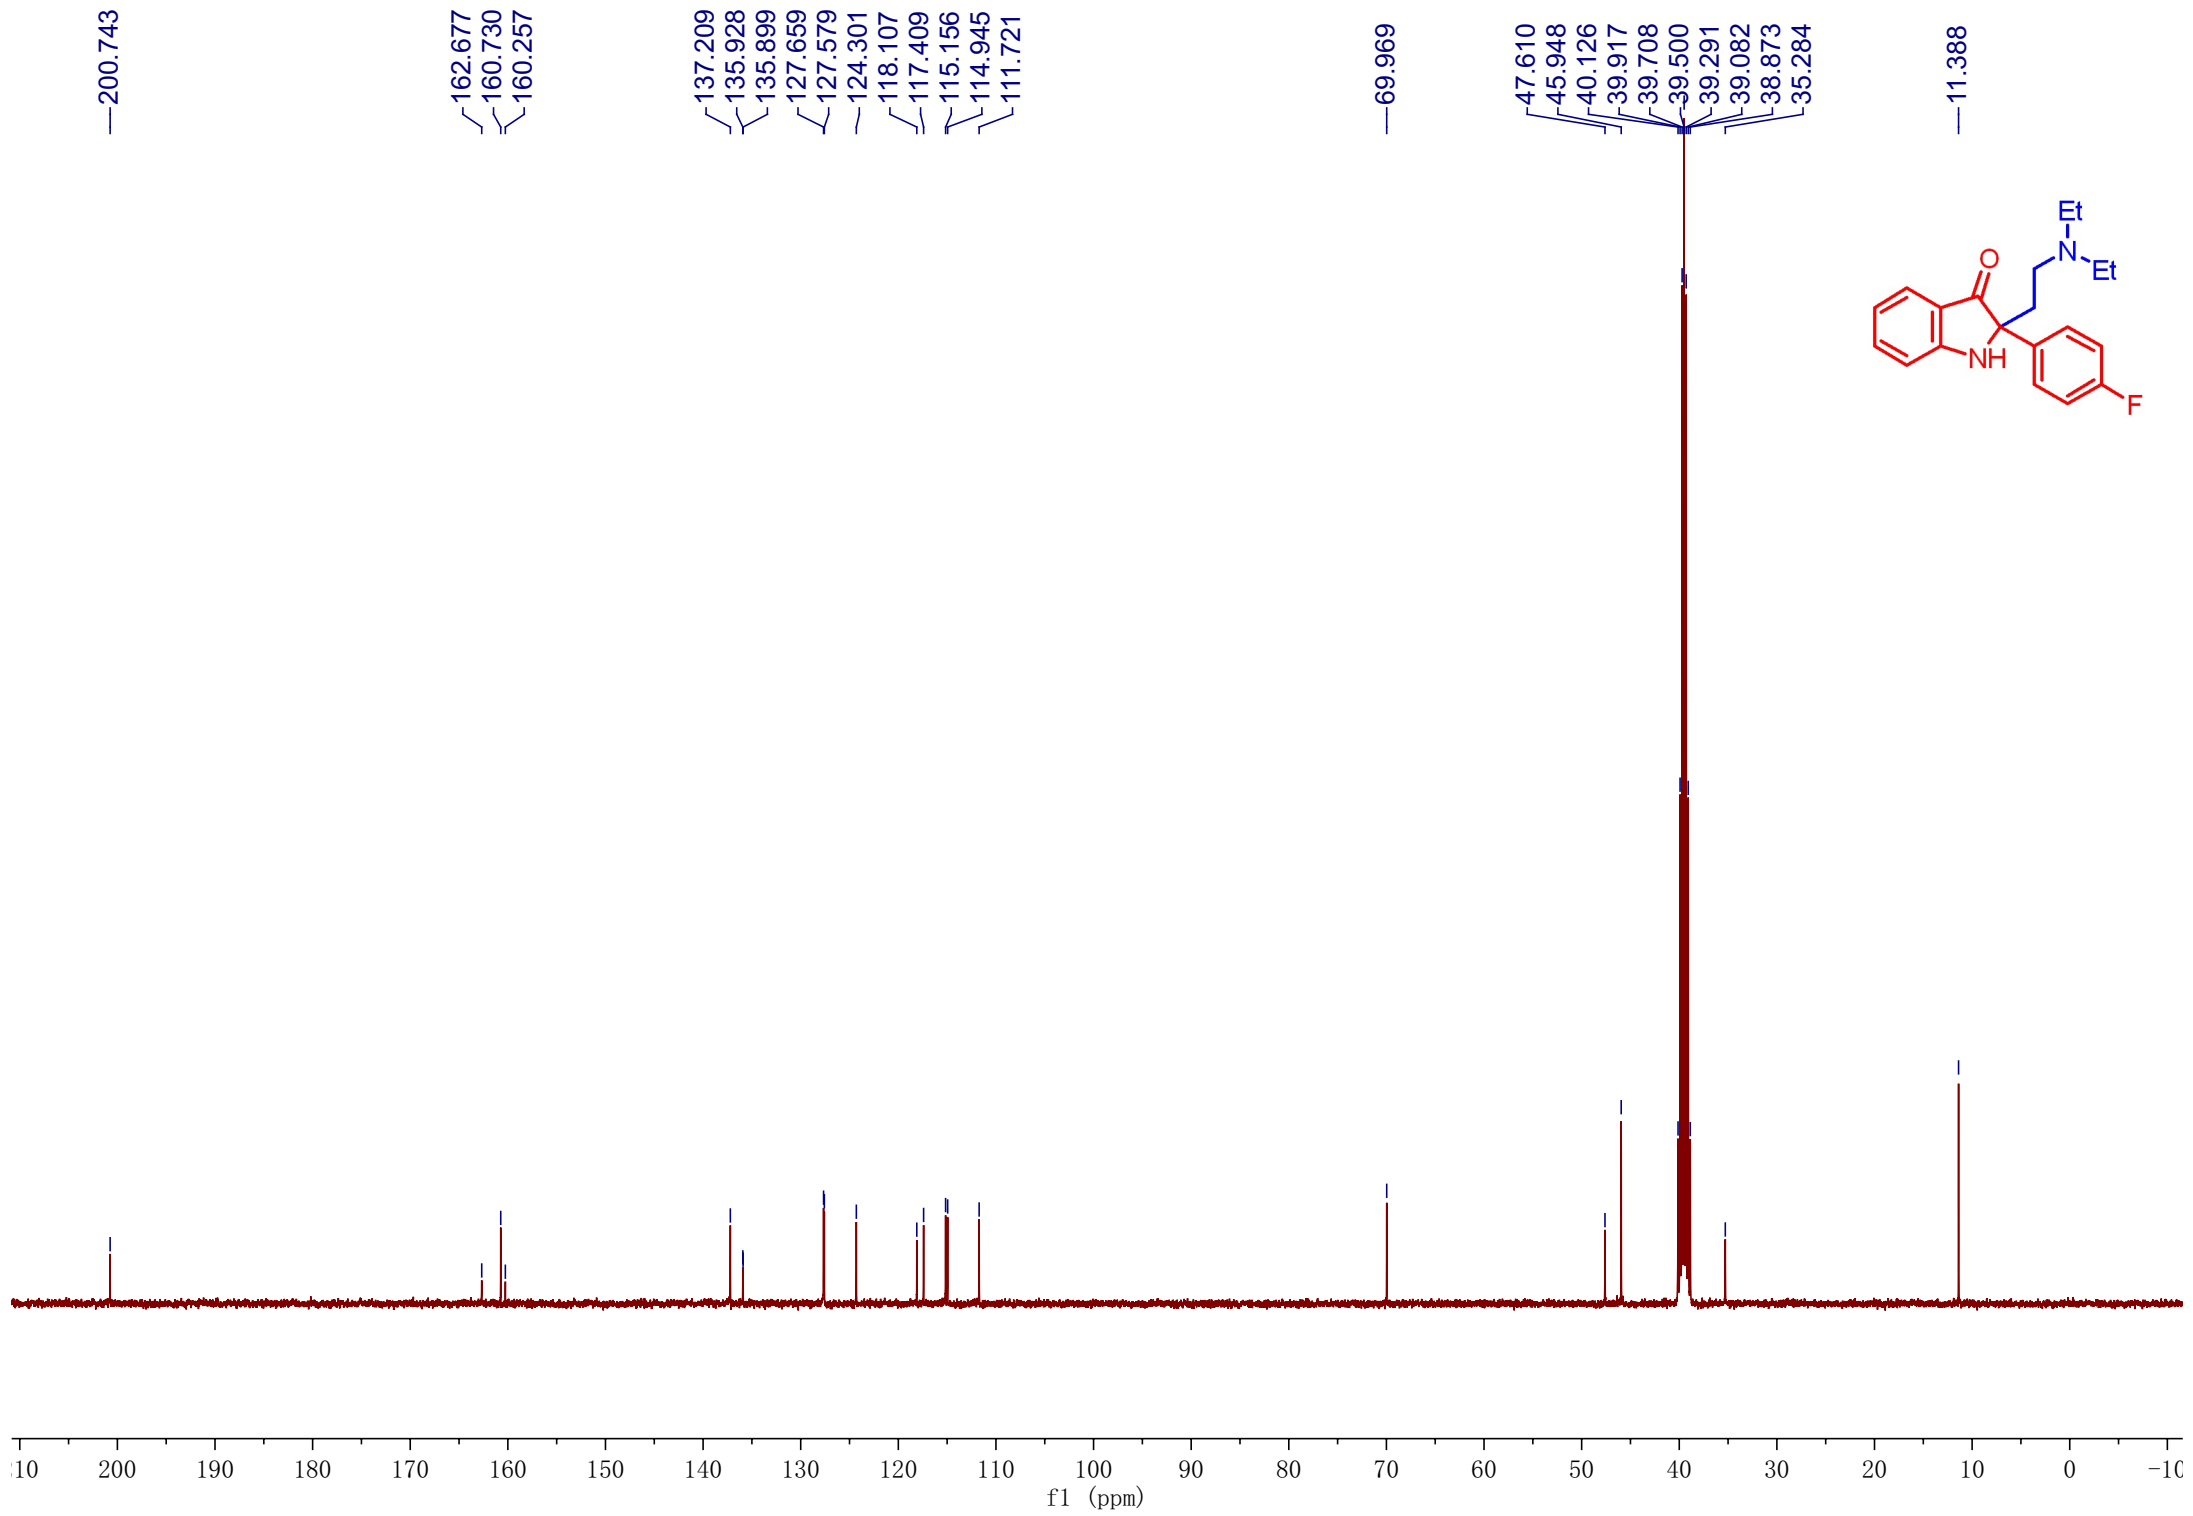

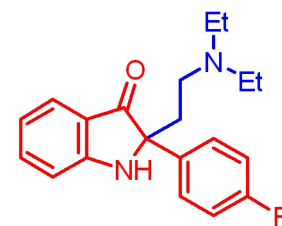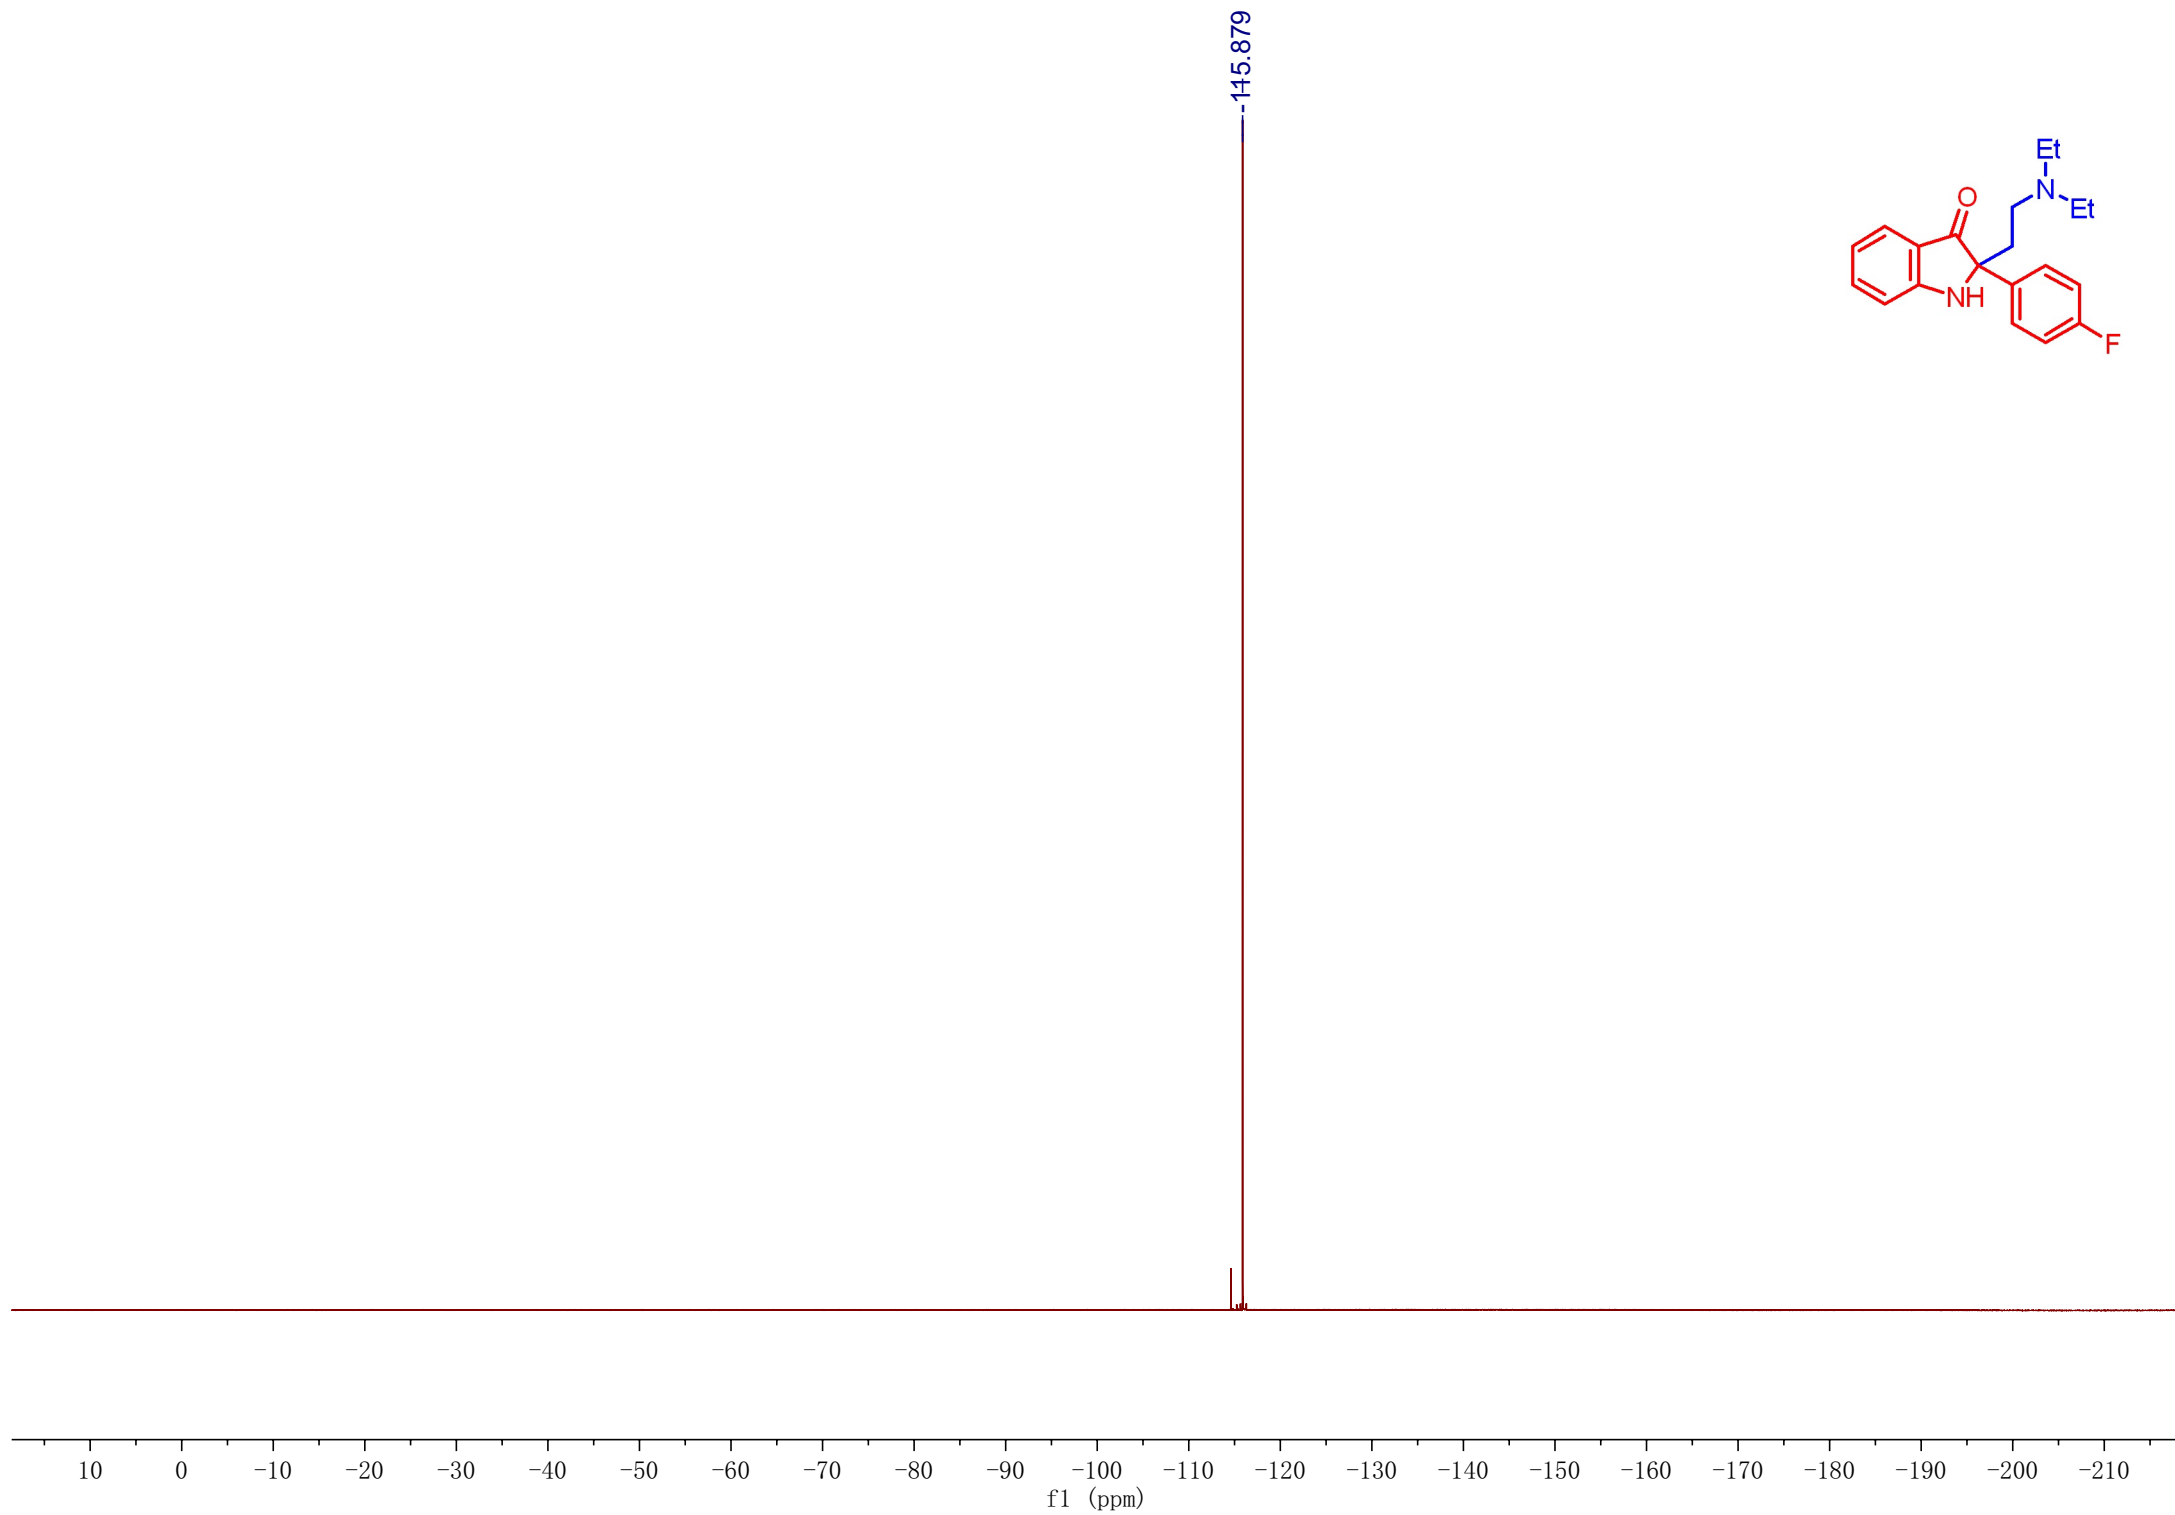

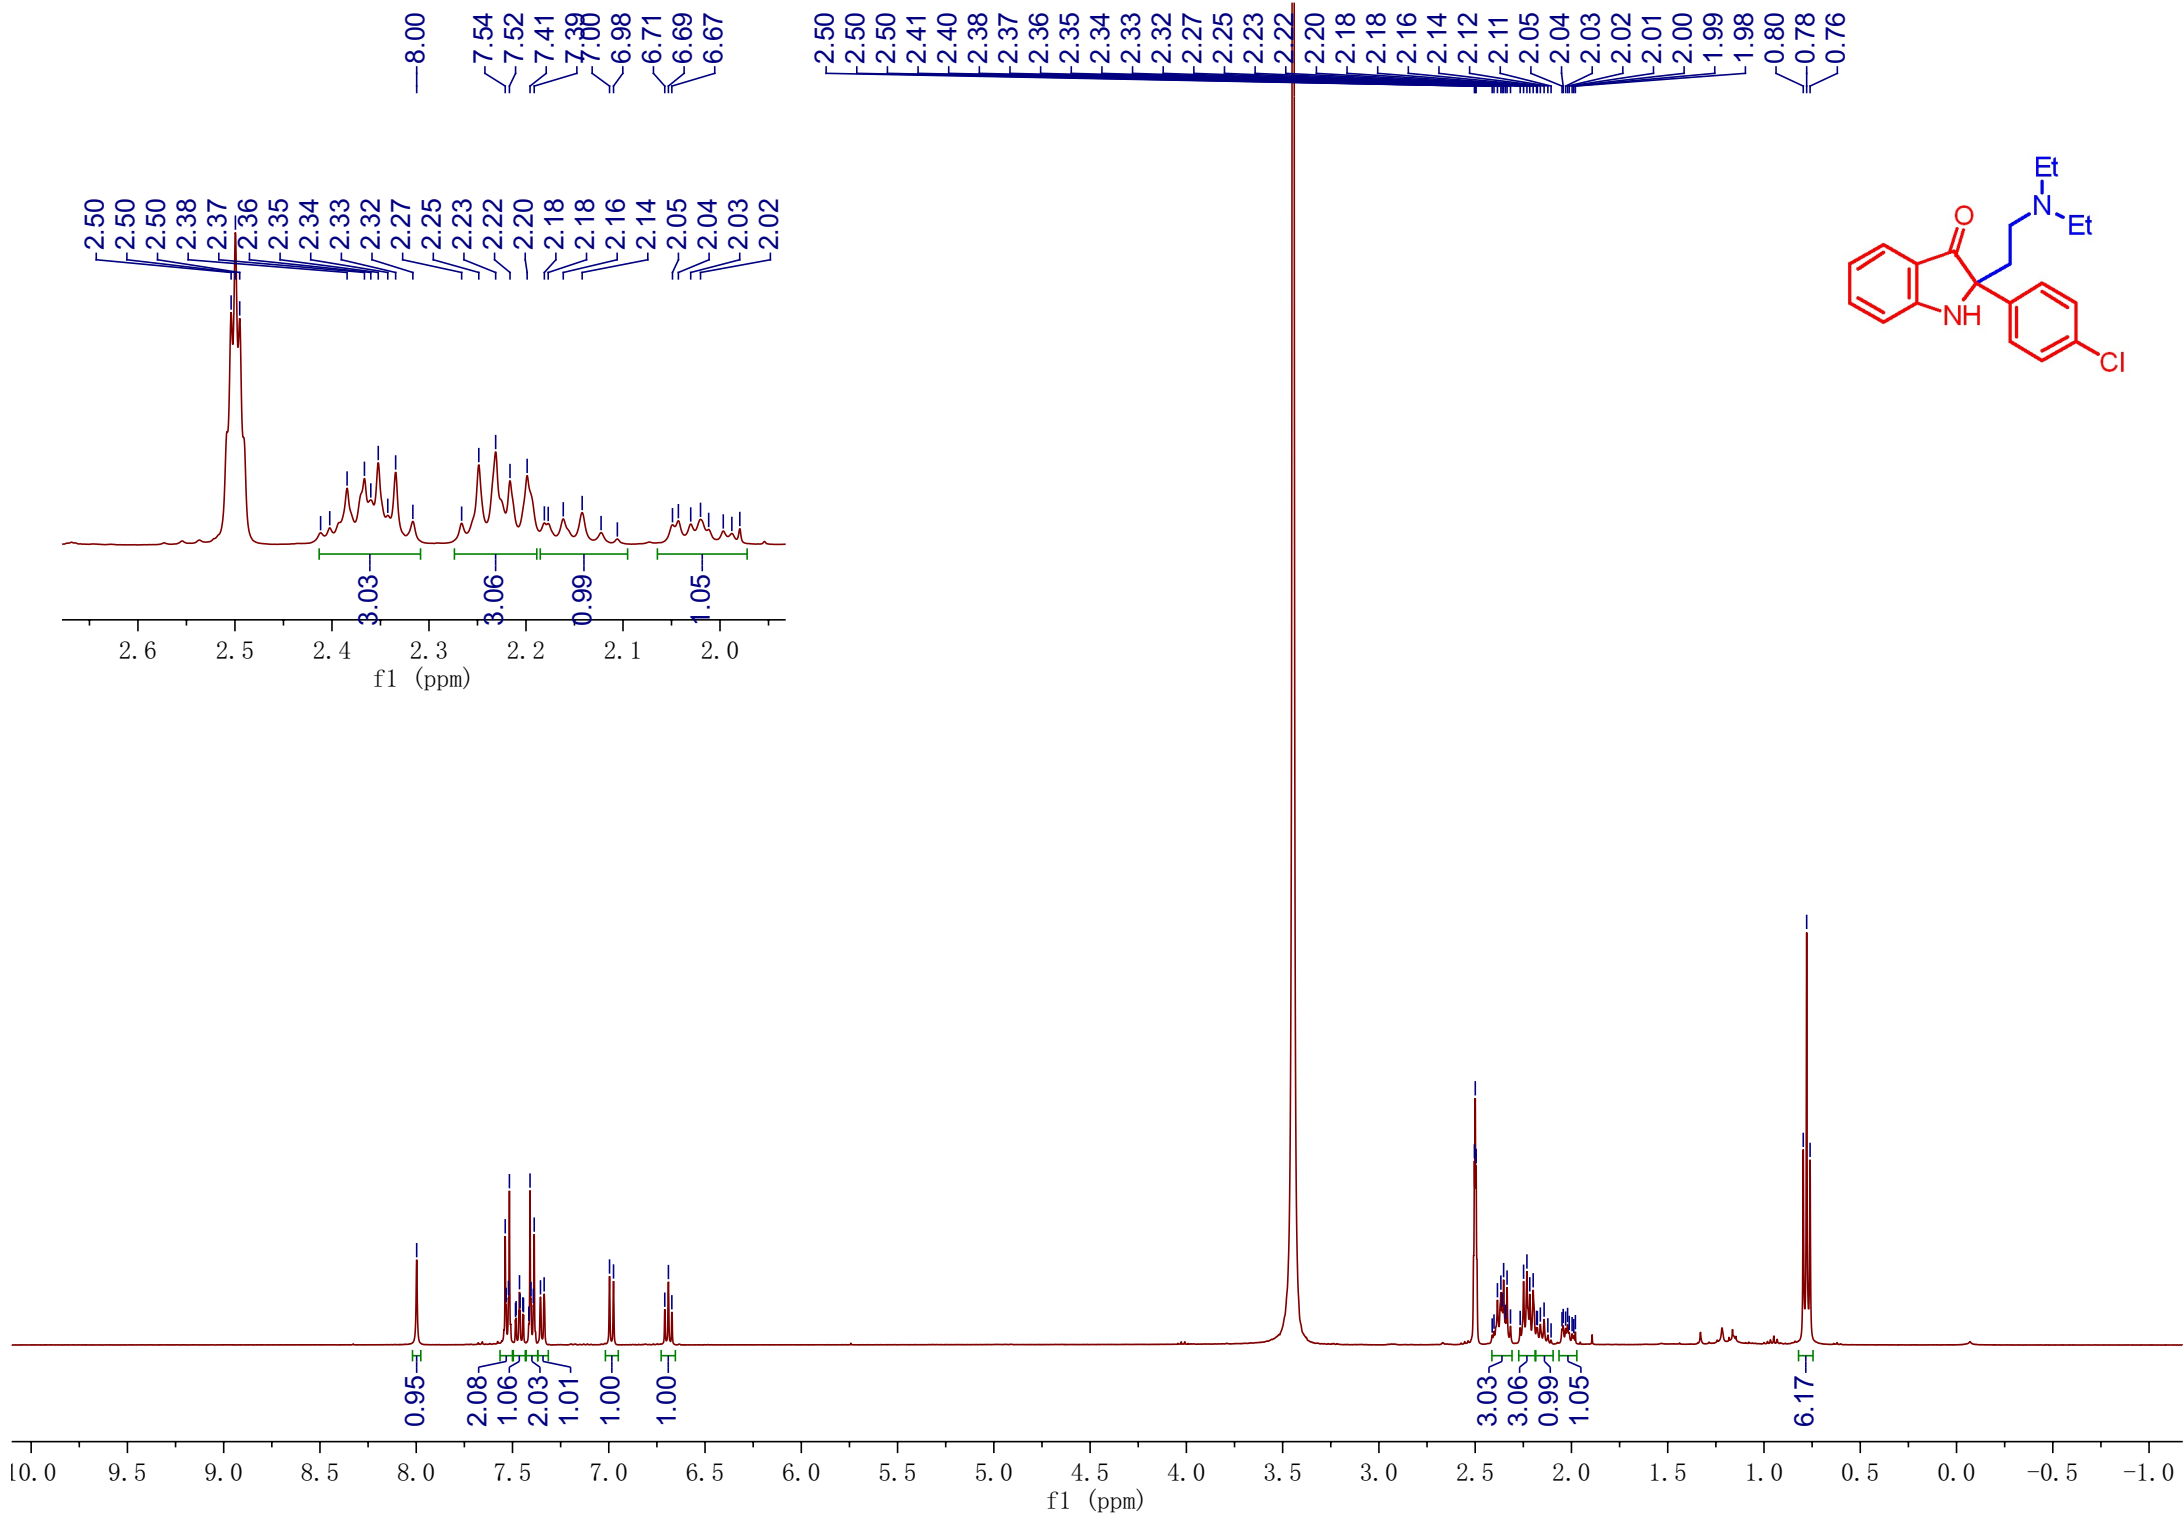

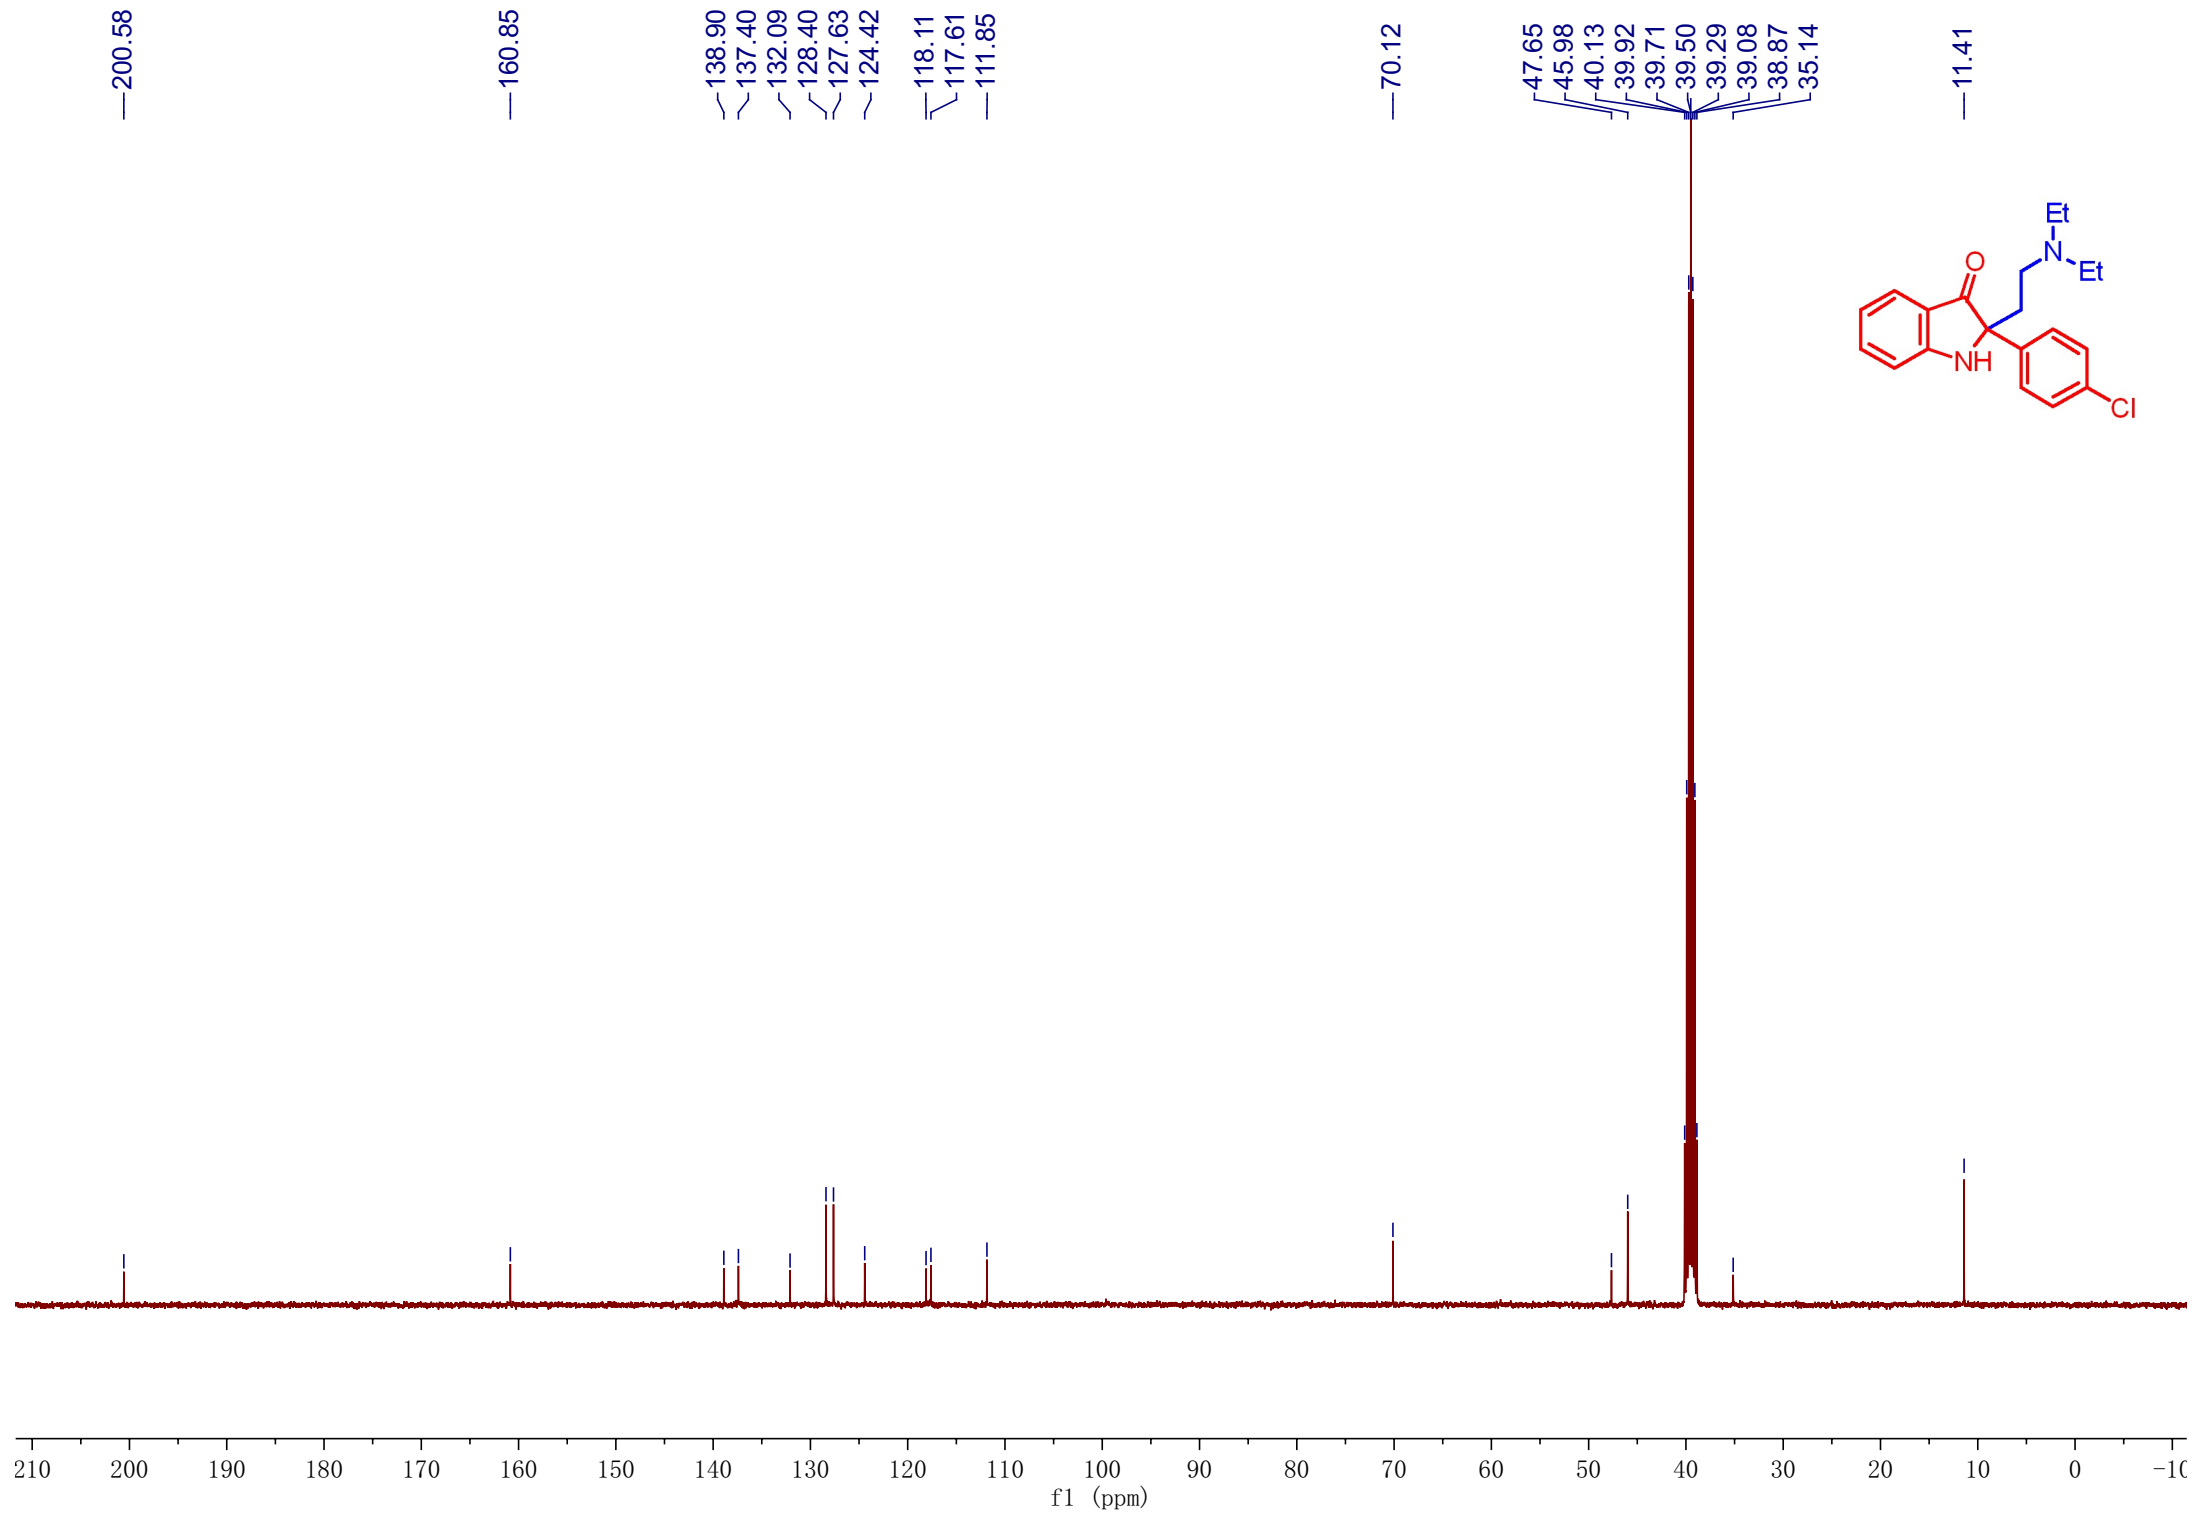

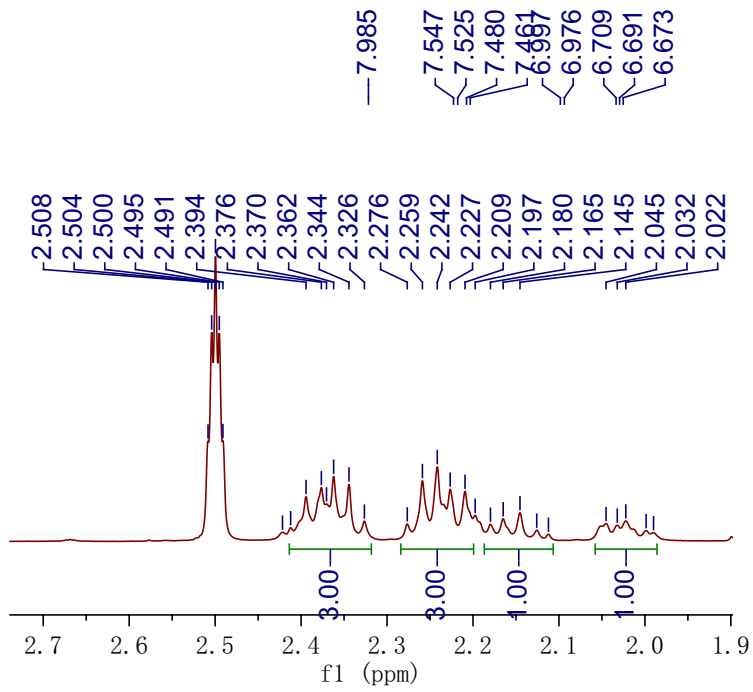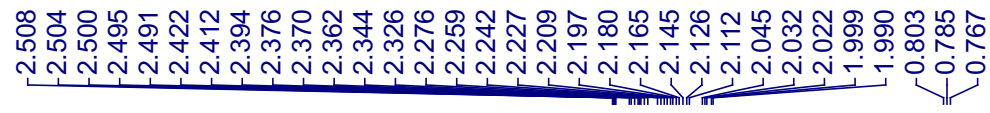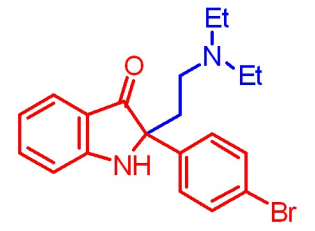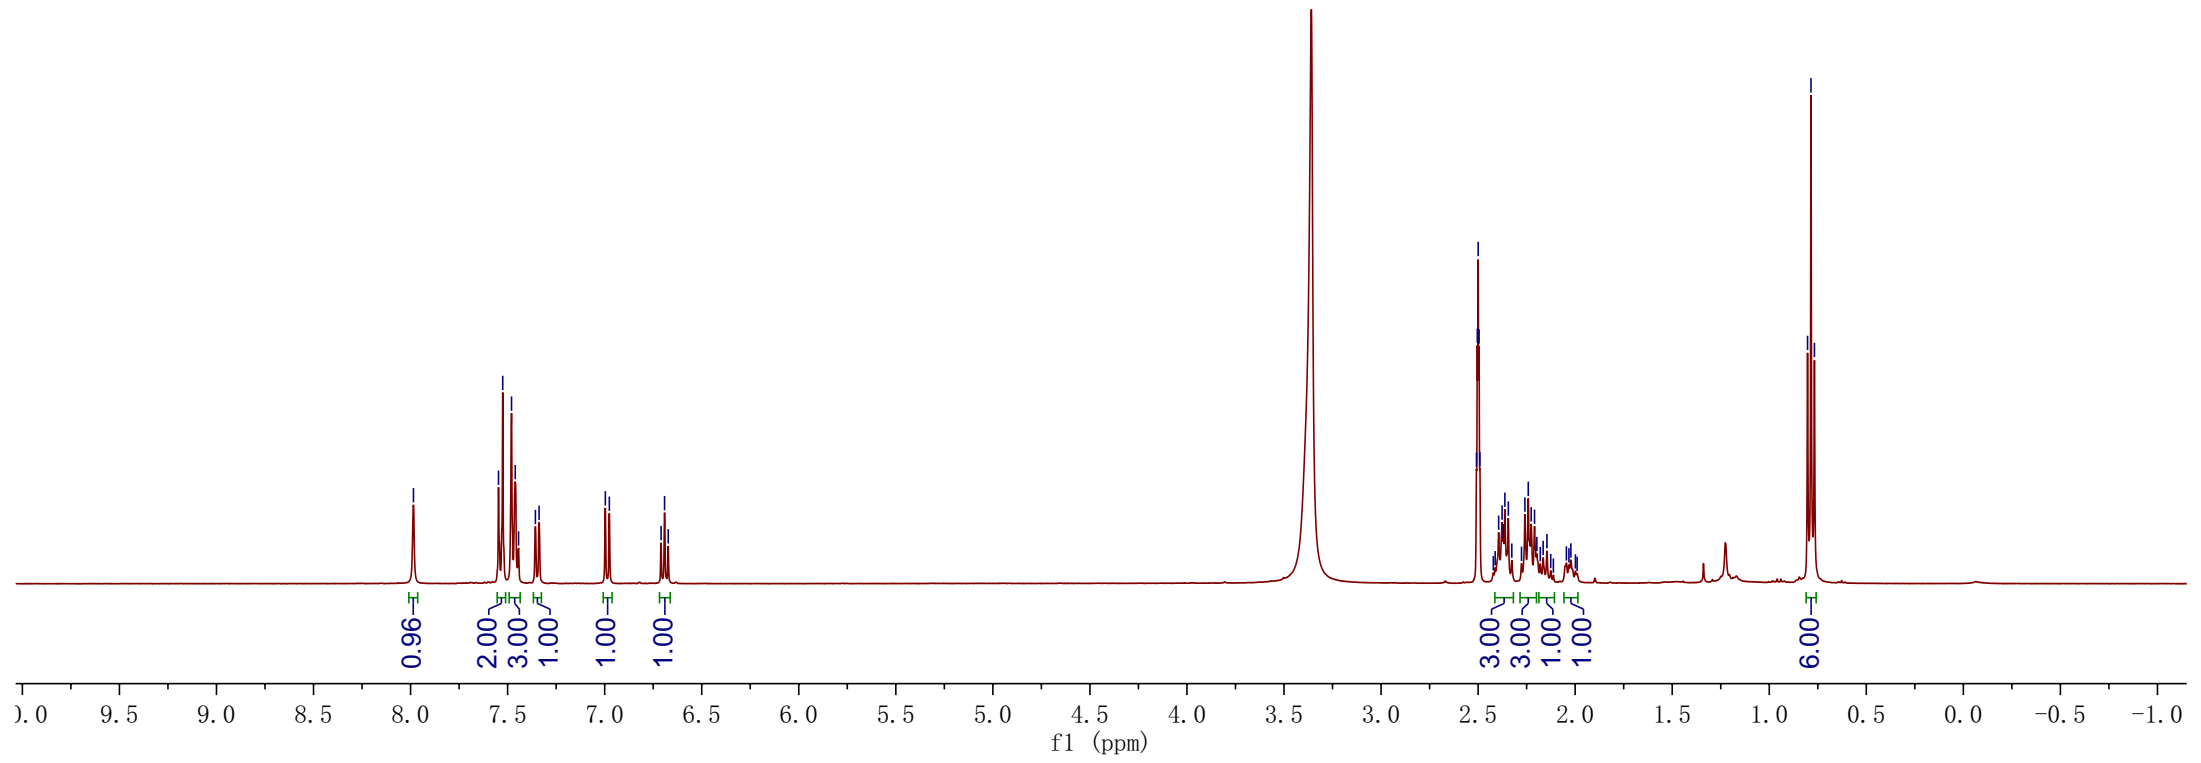

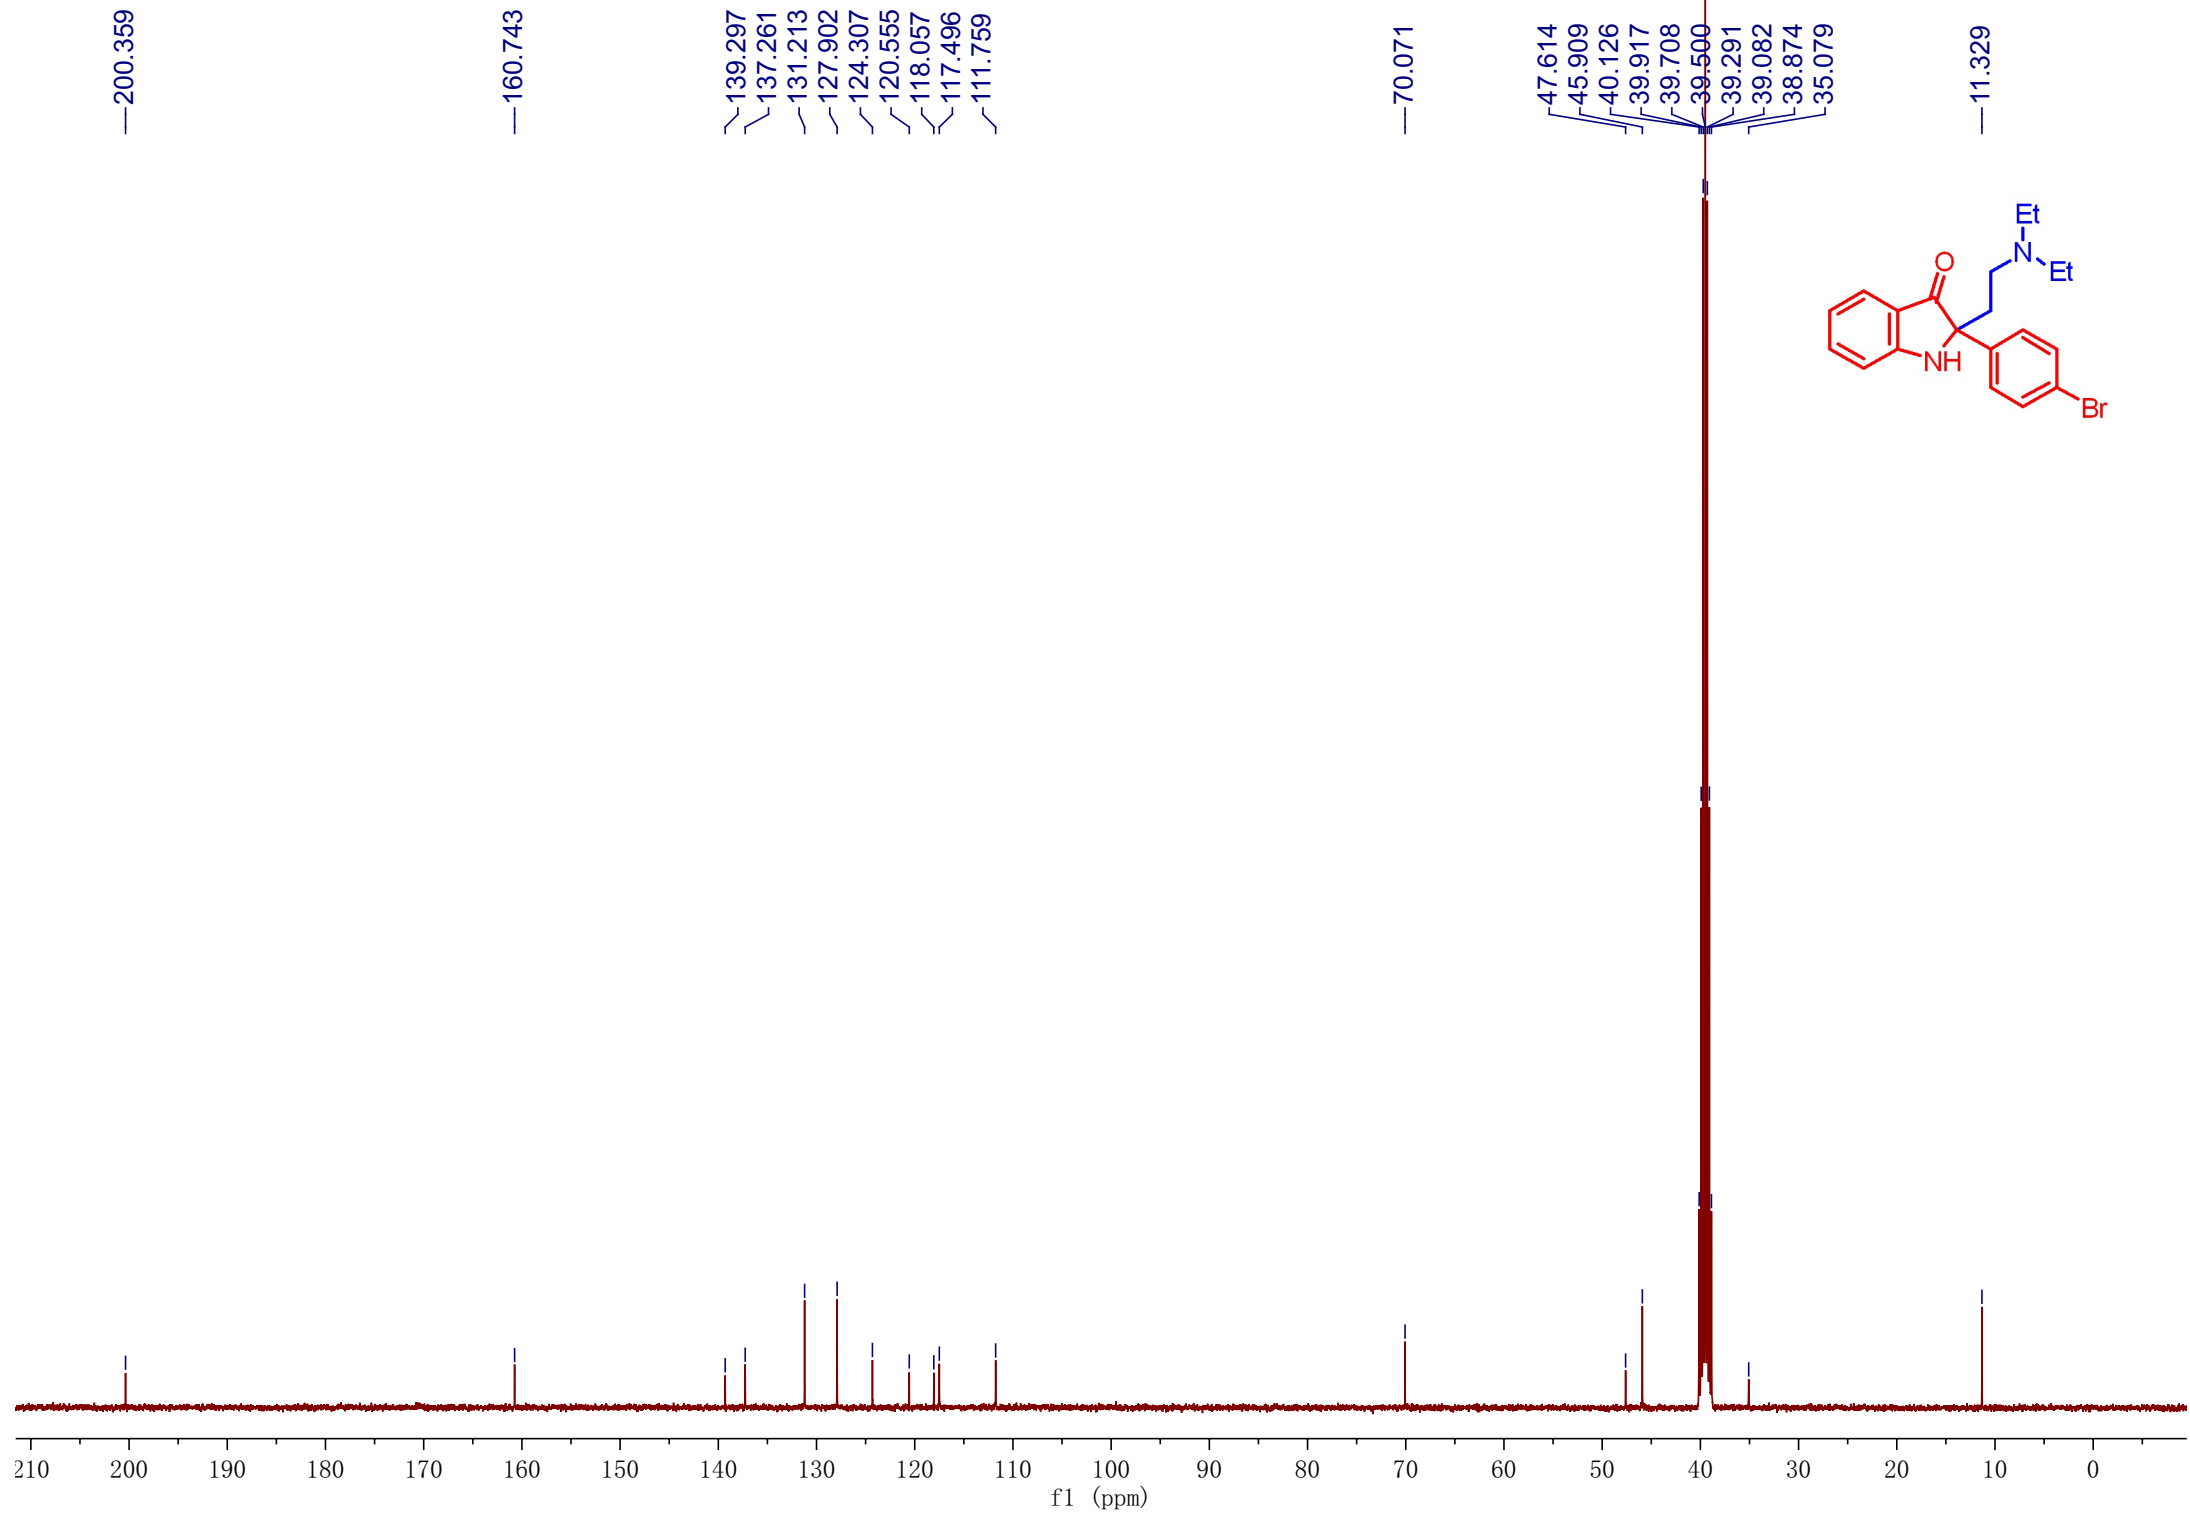

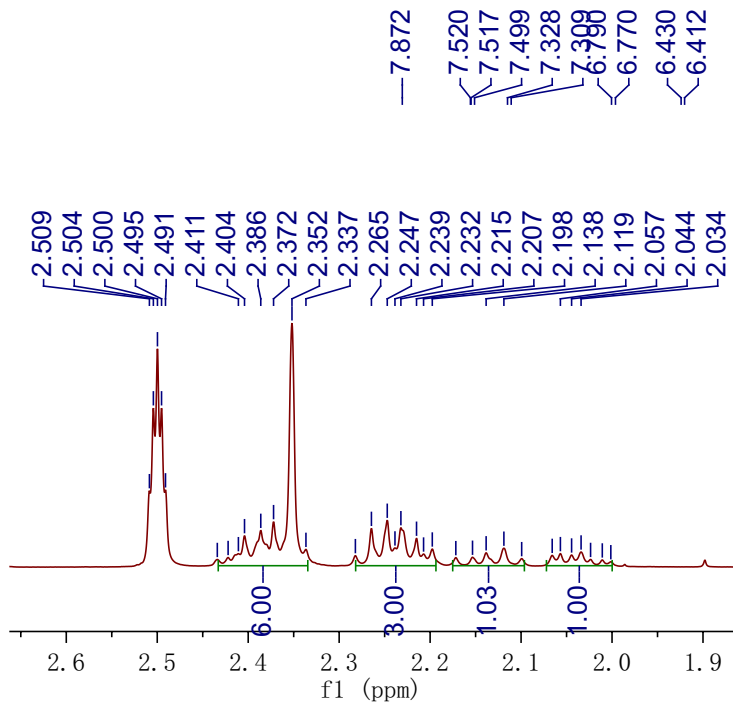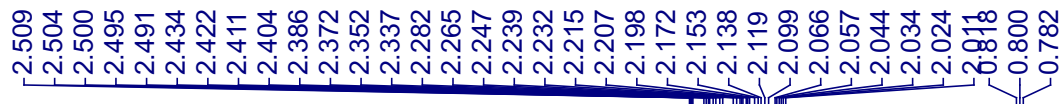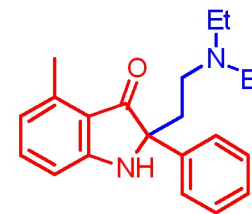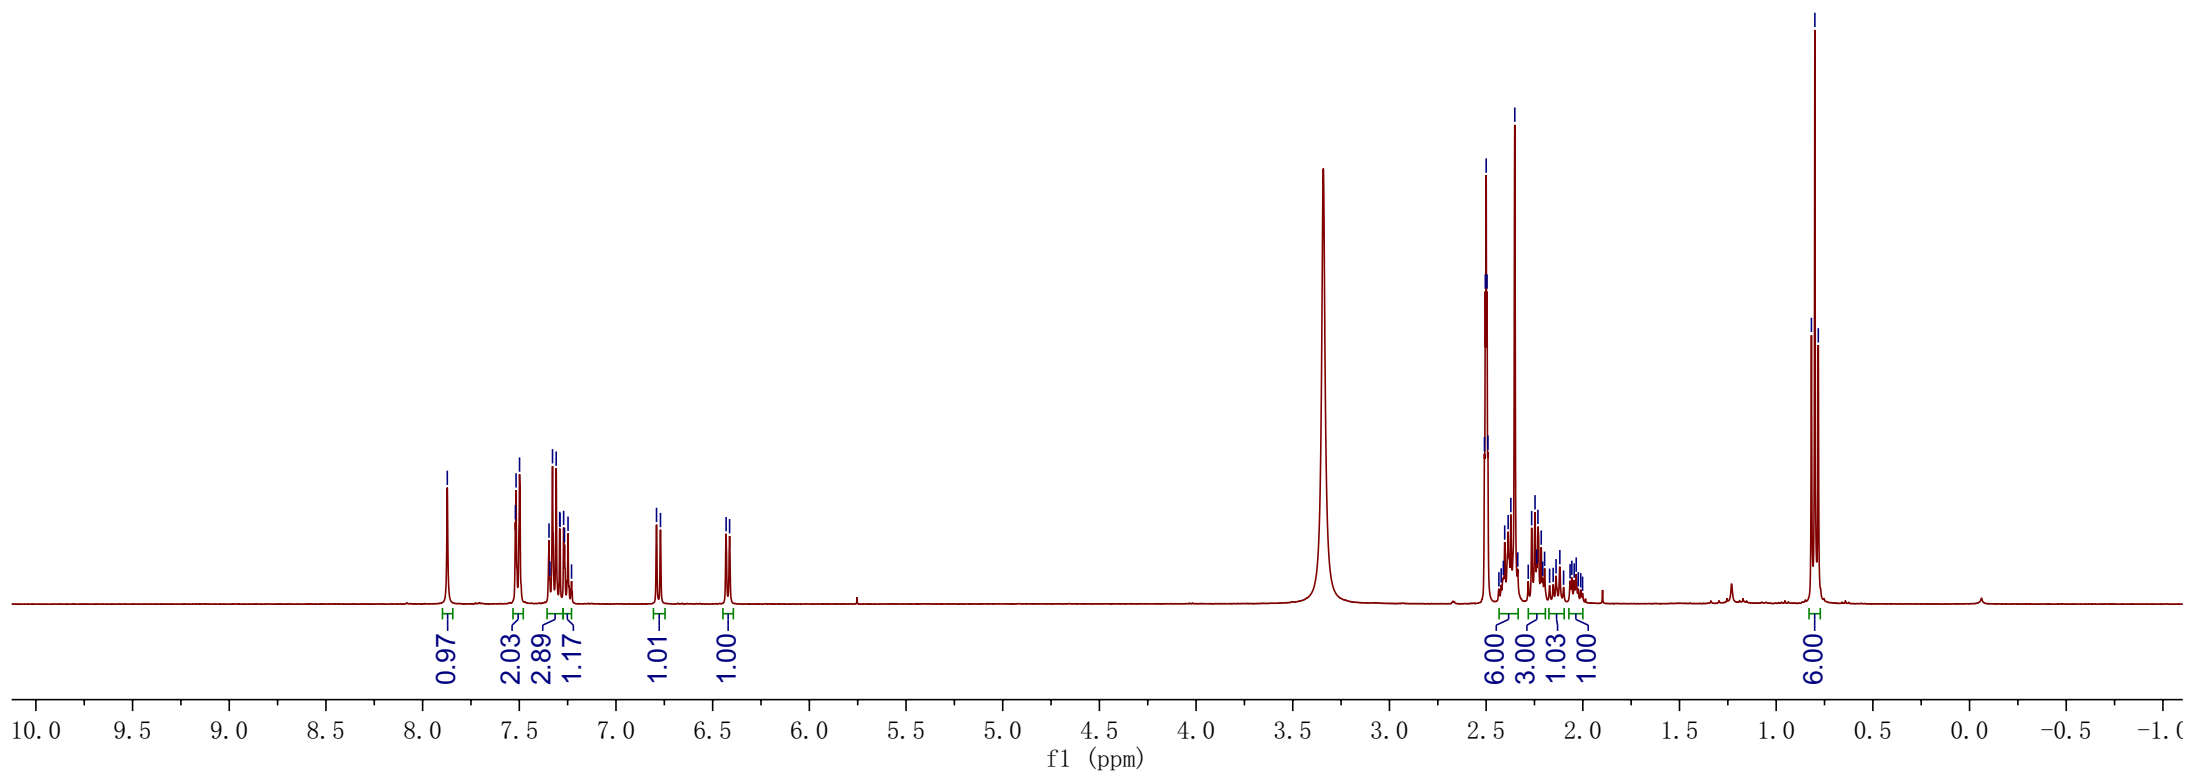



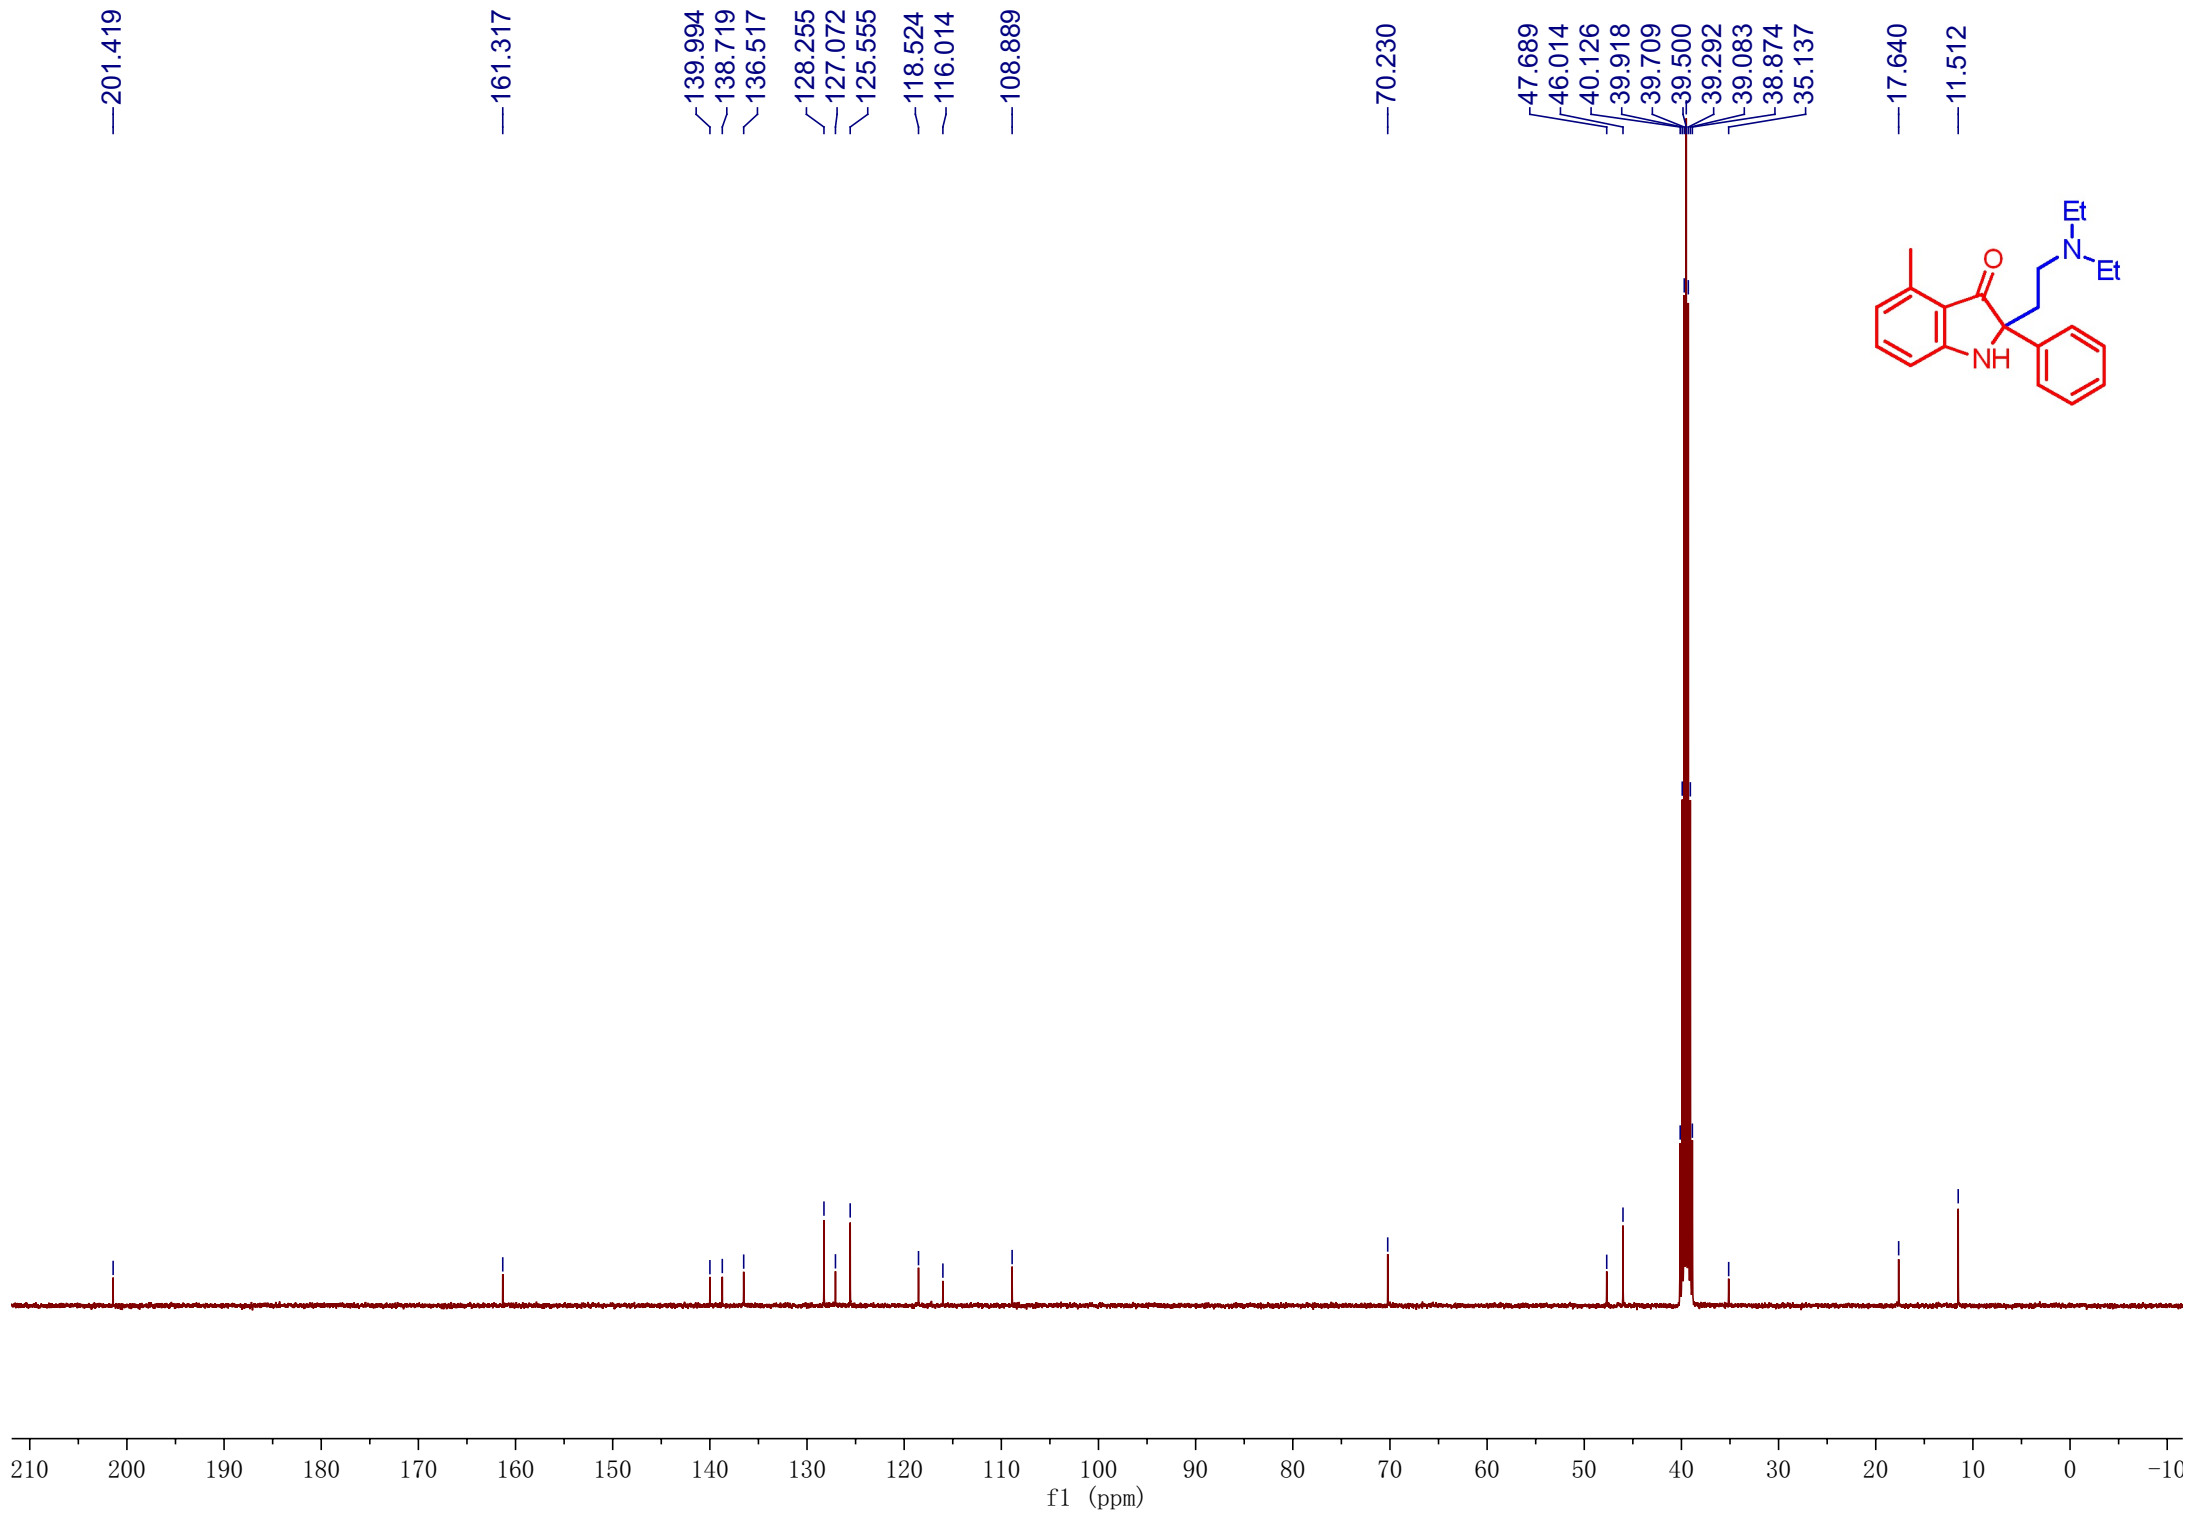

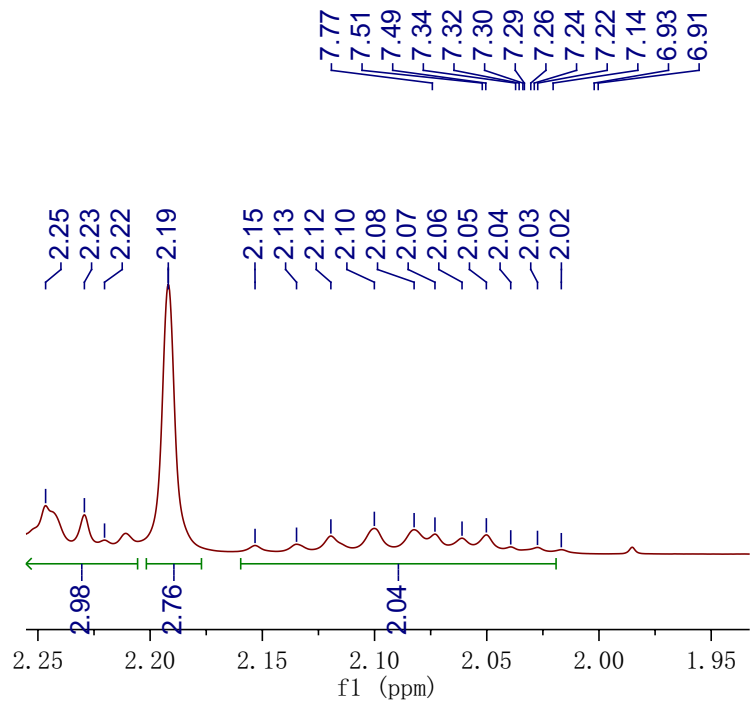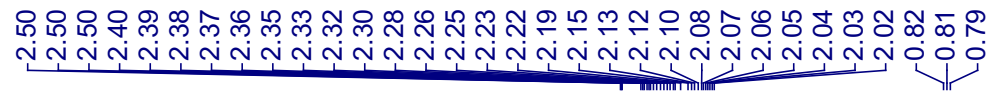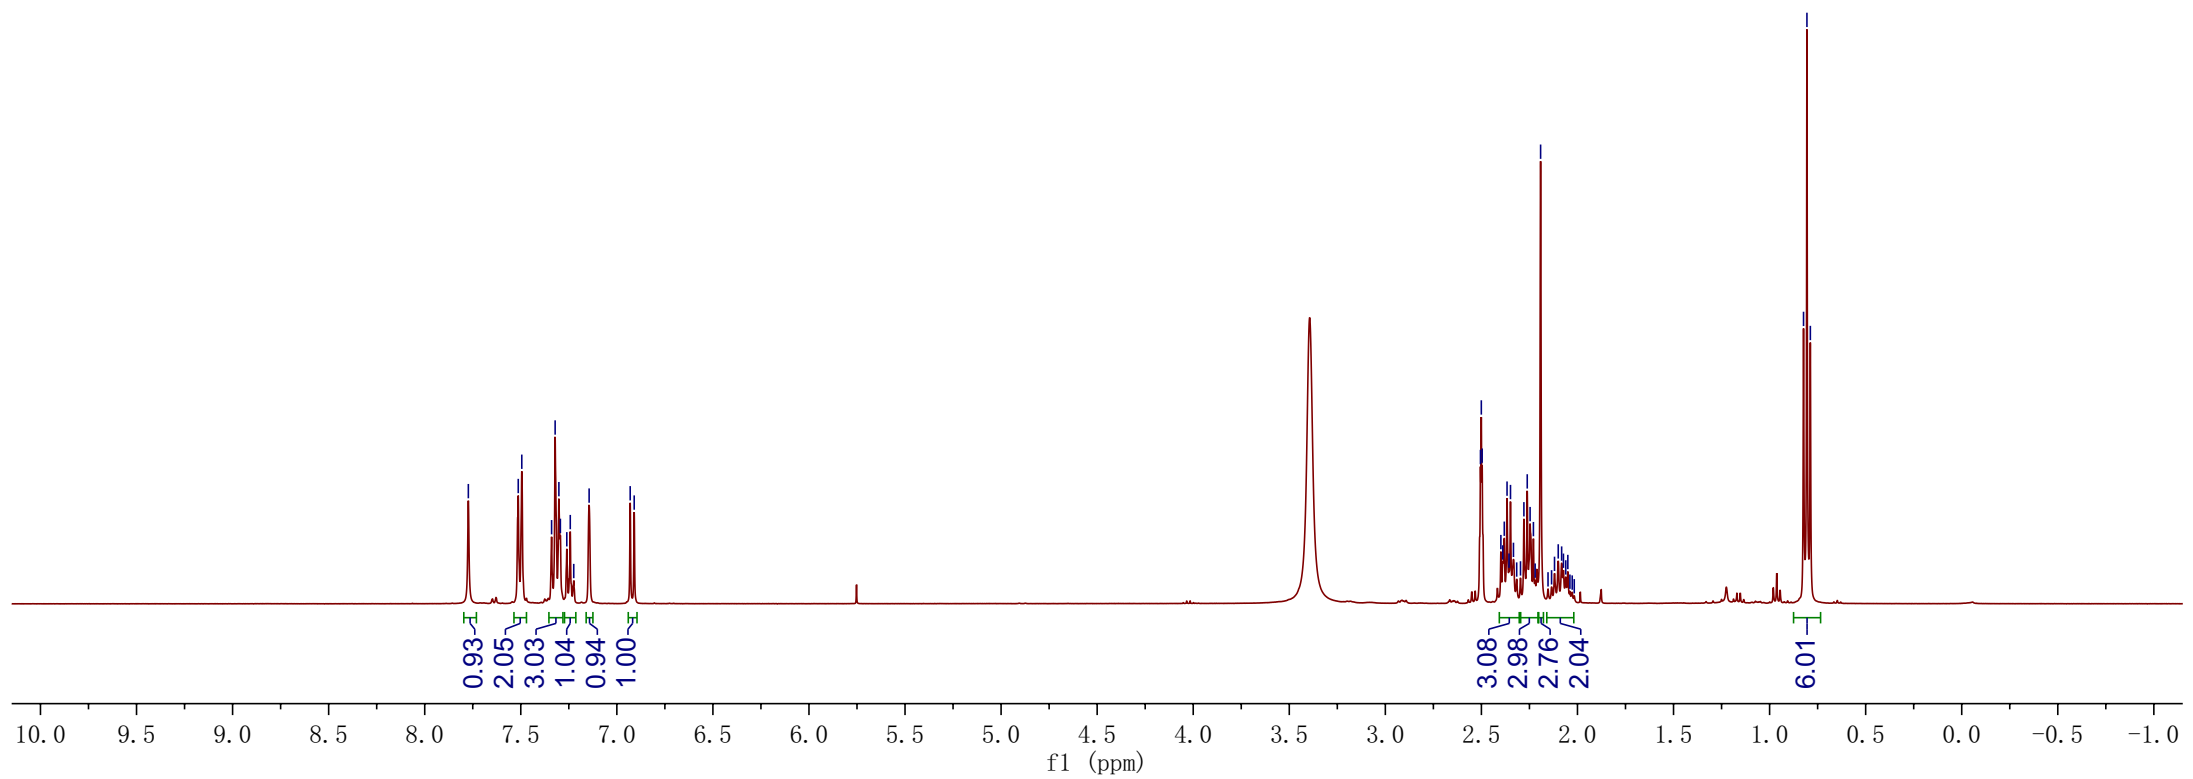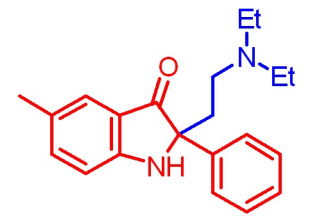

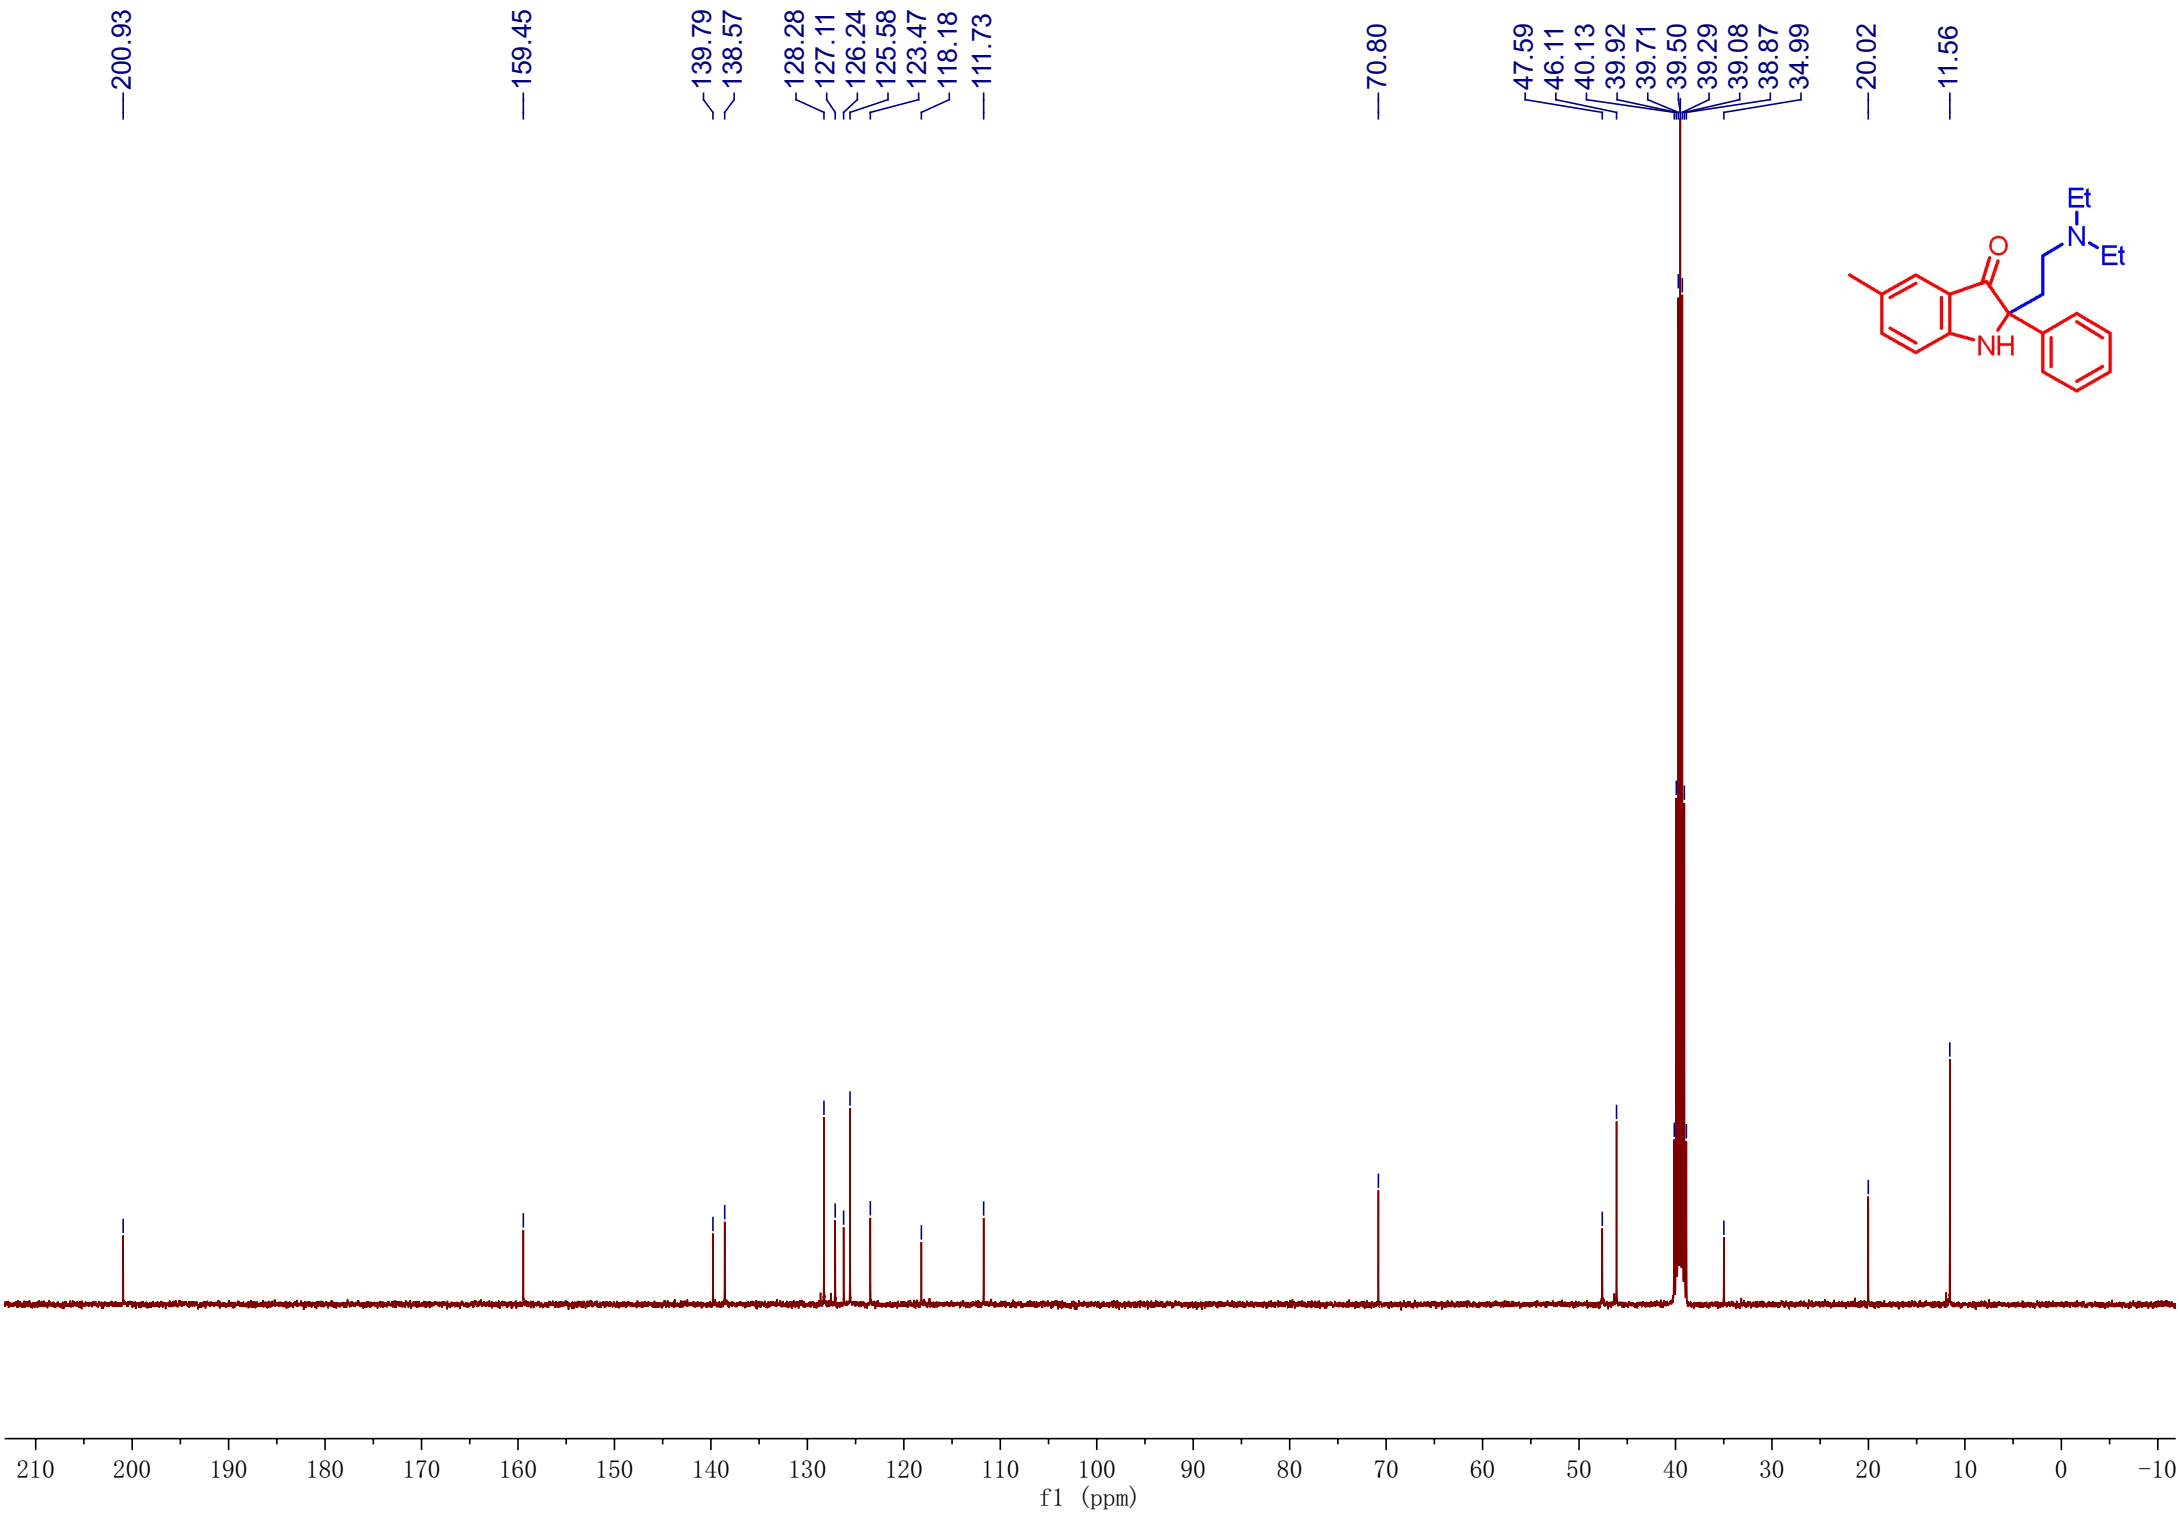

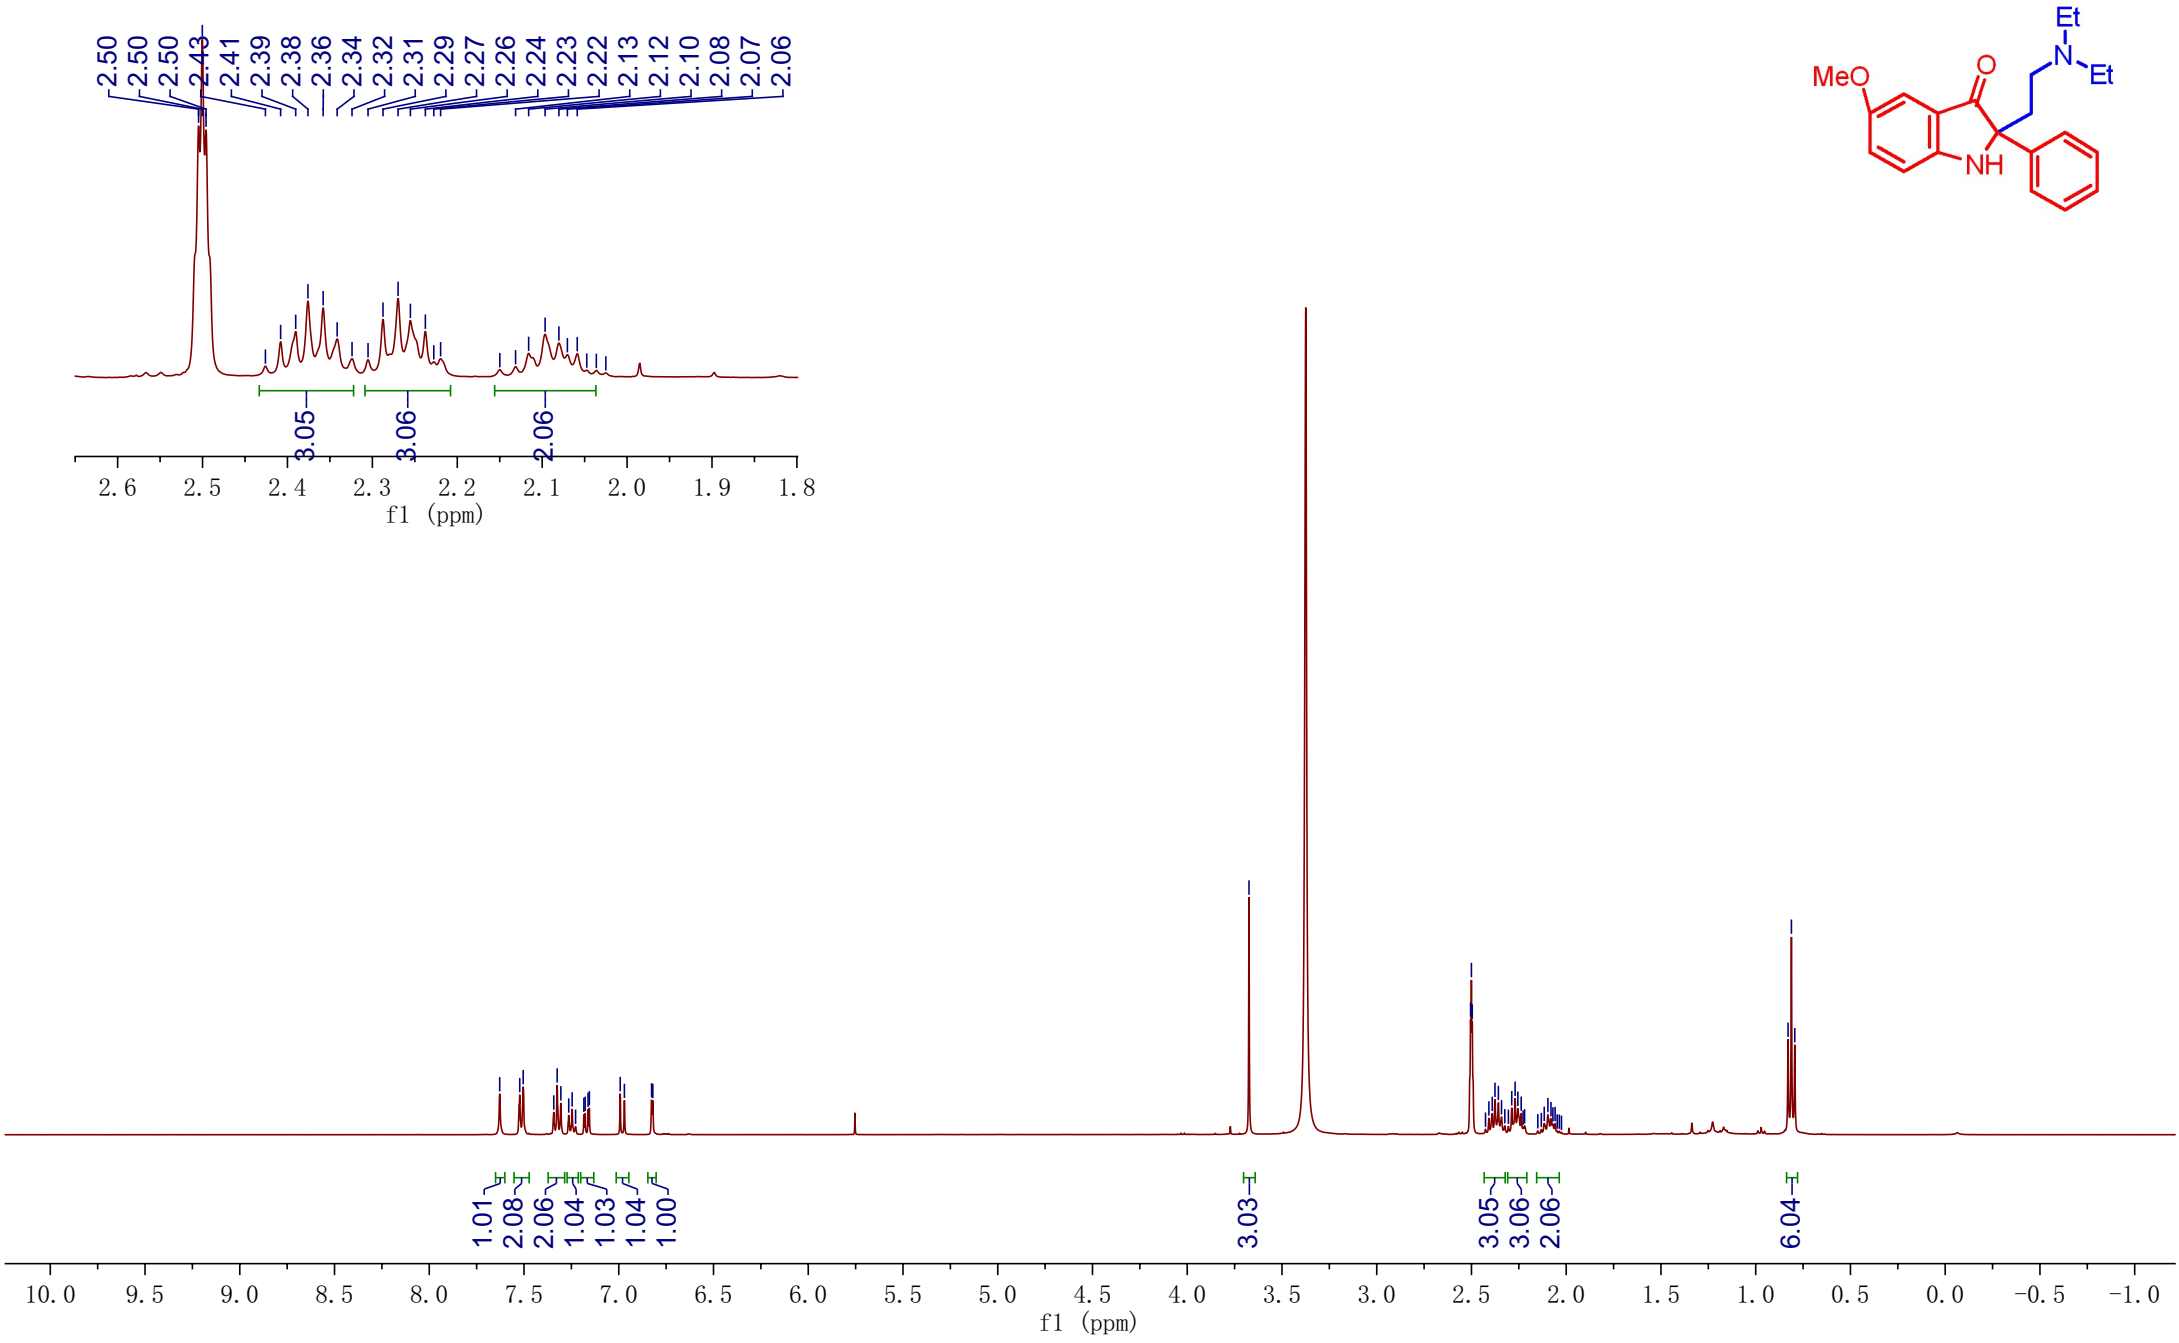

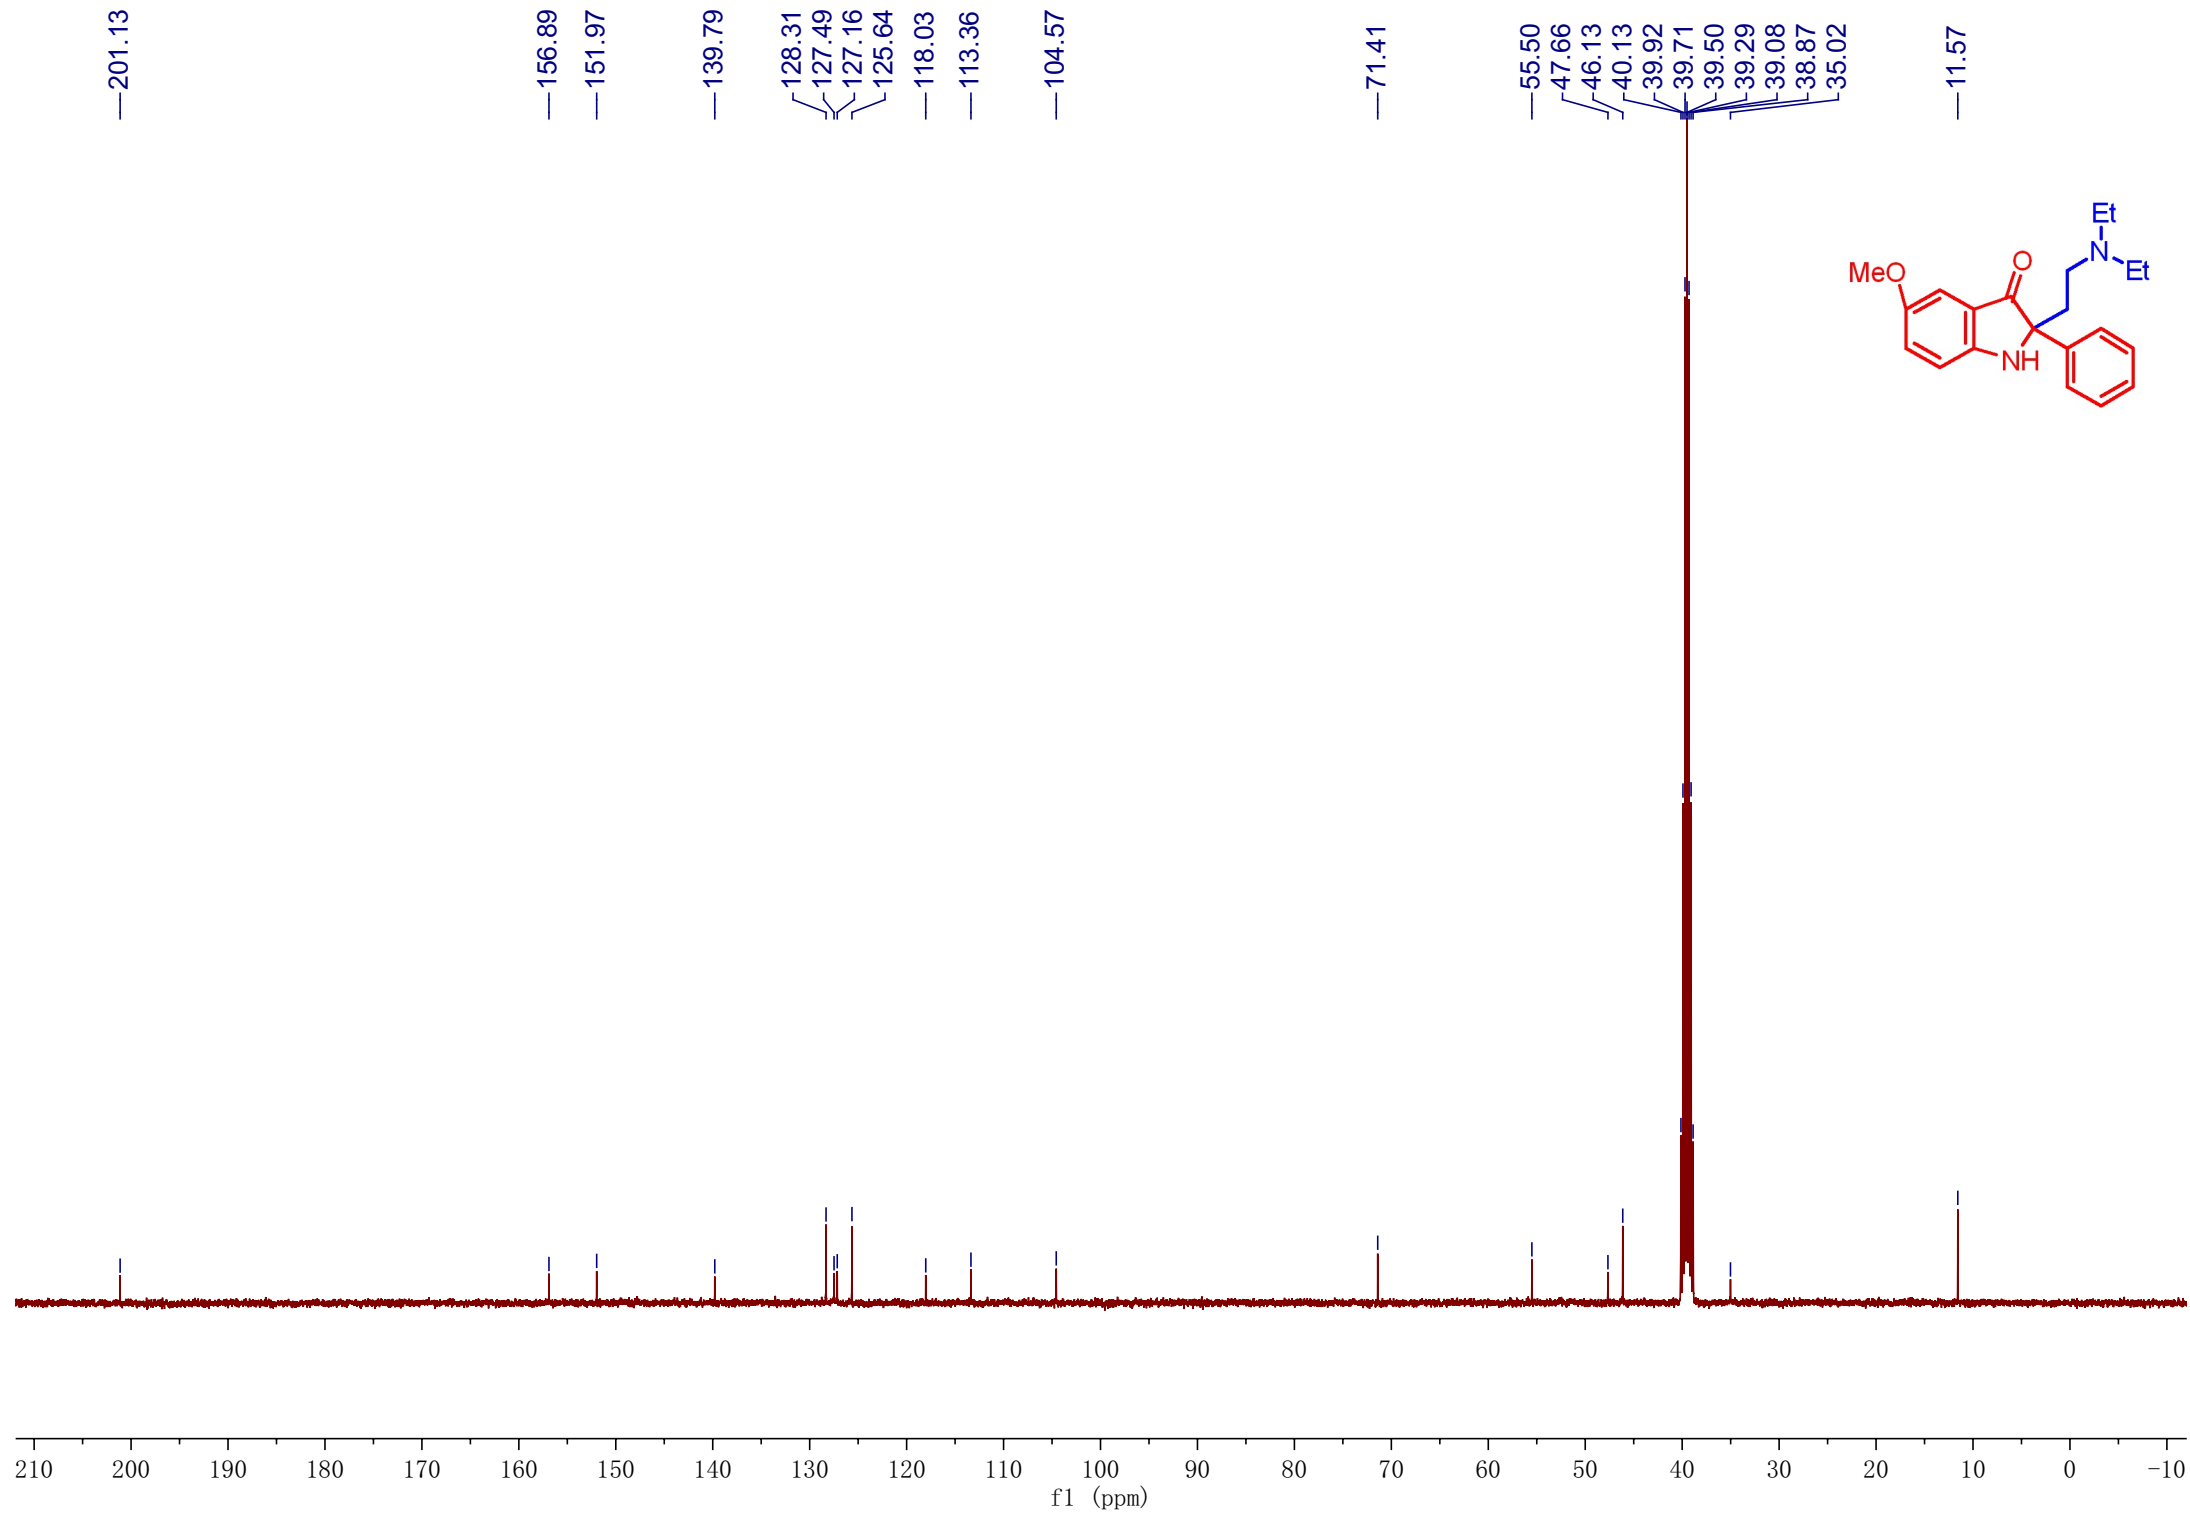

8.12  
7.50  
7.50  
7.48  
7.47  
7.46  
7.45  
7.44  
7.35  
7.34  
7.32  
7.31  
7.28  
7.27  
7.26  
7.25  
7.24  
7.02  
7.00

2.50  
2.50  
2.50  
2.44  
2.42  
2.41  
2.38  
2.37  
2.35  
2.33  
2.32  
2.31  
2.30  
2.29  
2.27  
2.25  
2.23  
2.22  
2.20  
2.18  
2.04  
2.03  
2.02  
0.98  
0.76  
0.75

2.50  
2.50  
2.50  
2.44  
2.42  
2.41  
2.38  
2.37  
2.35  
2.33  
2.32  
2.31  
2.30  
2.29  
2.27  
2.25  
2.23  
2.22  
2.20  
2.18  
2.04  
2.02  
2.02

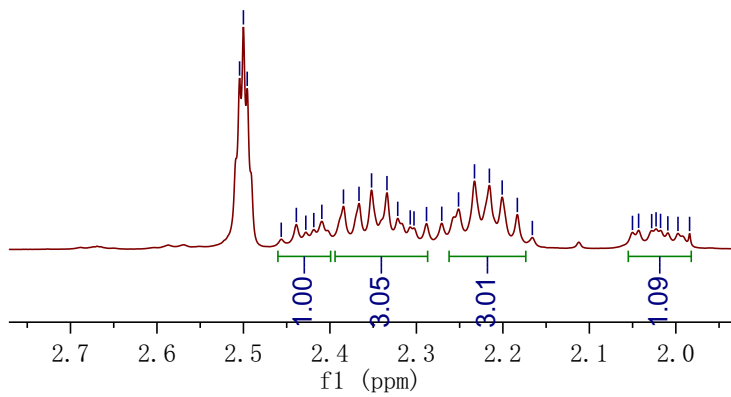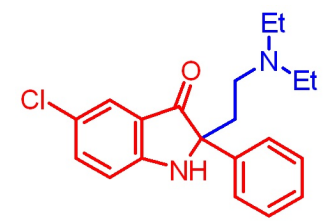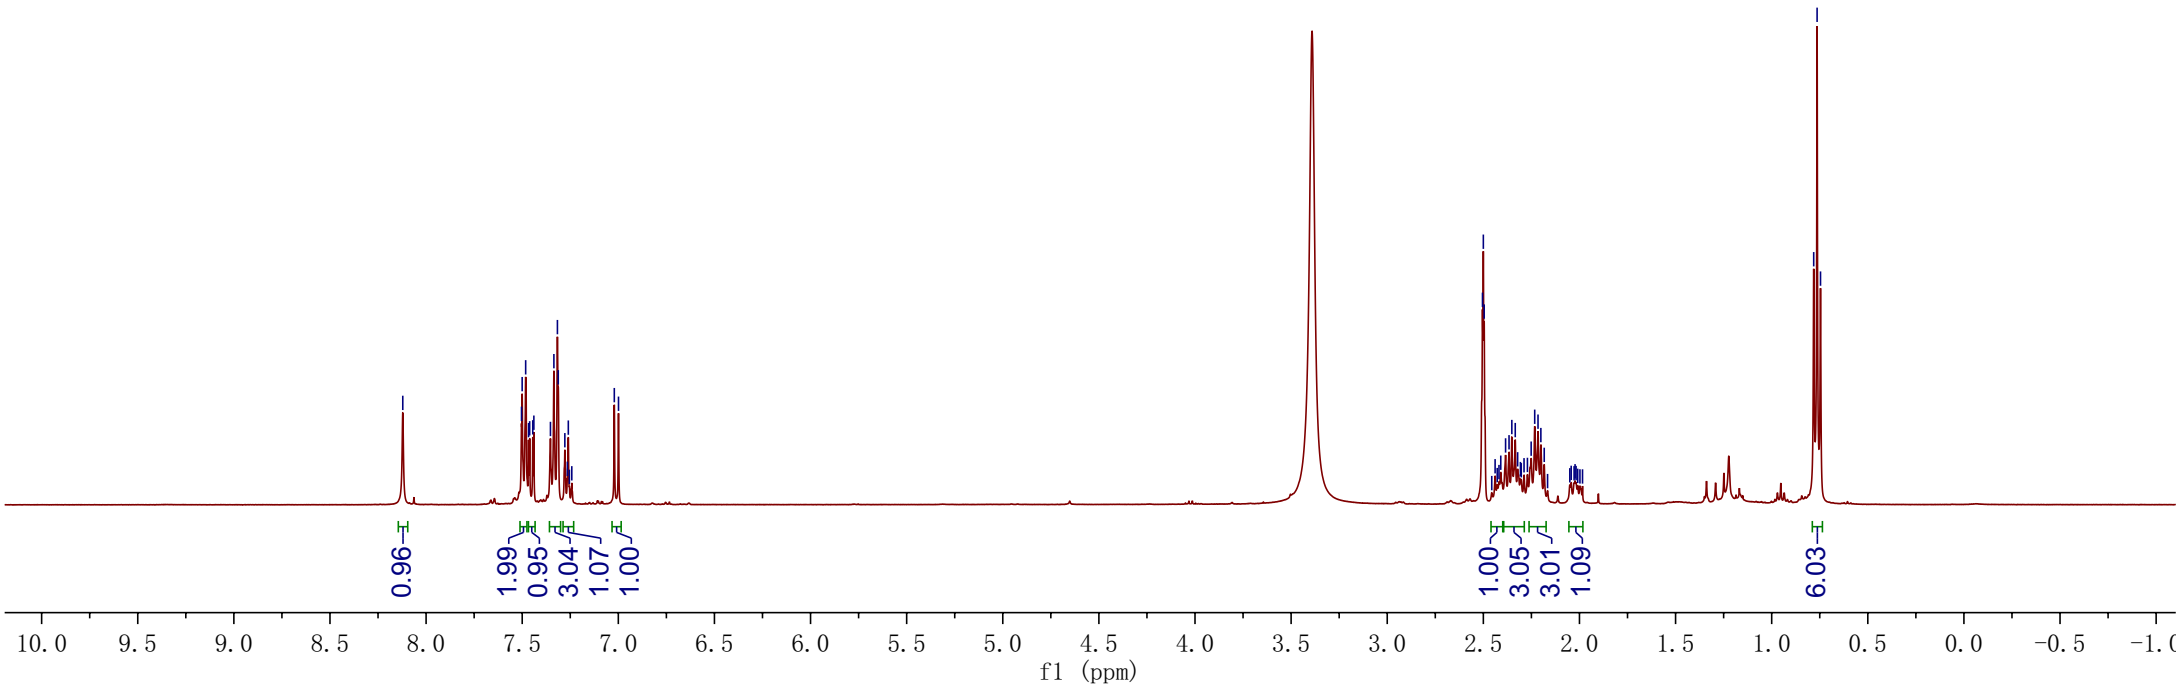

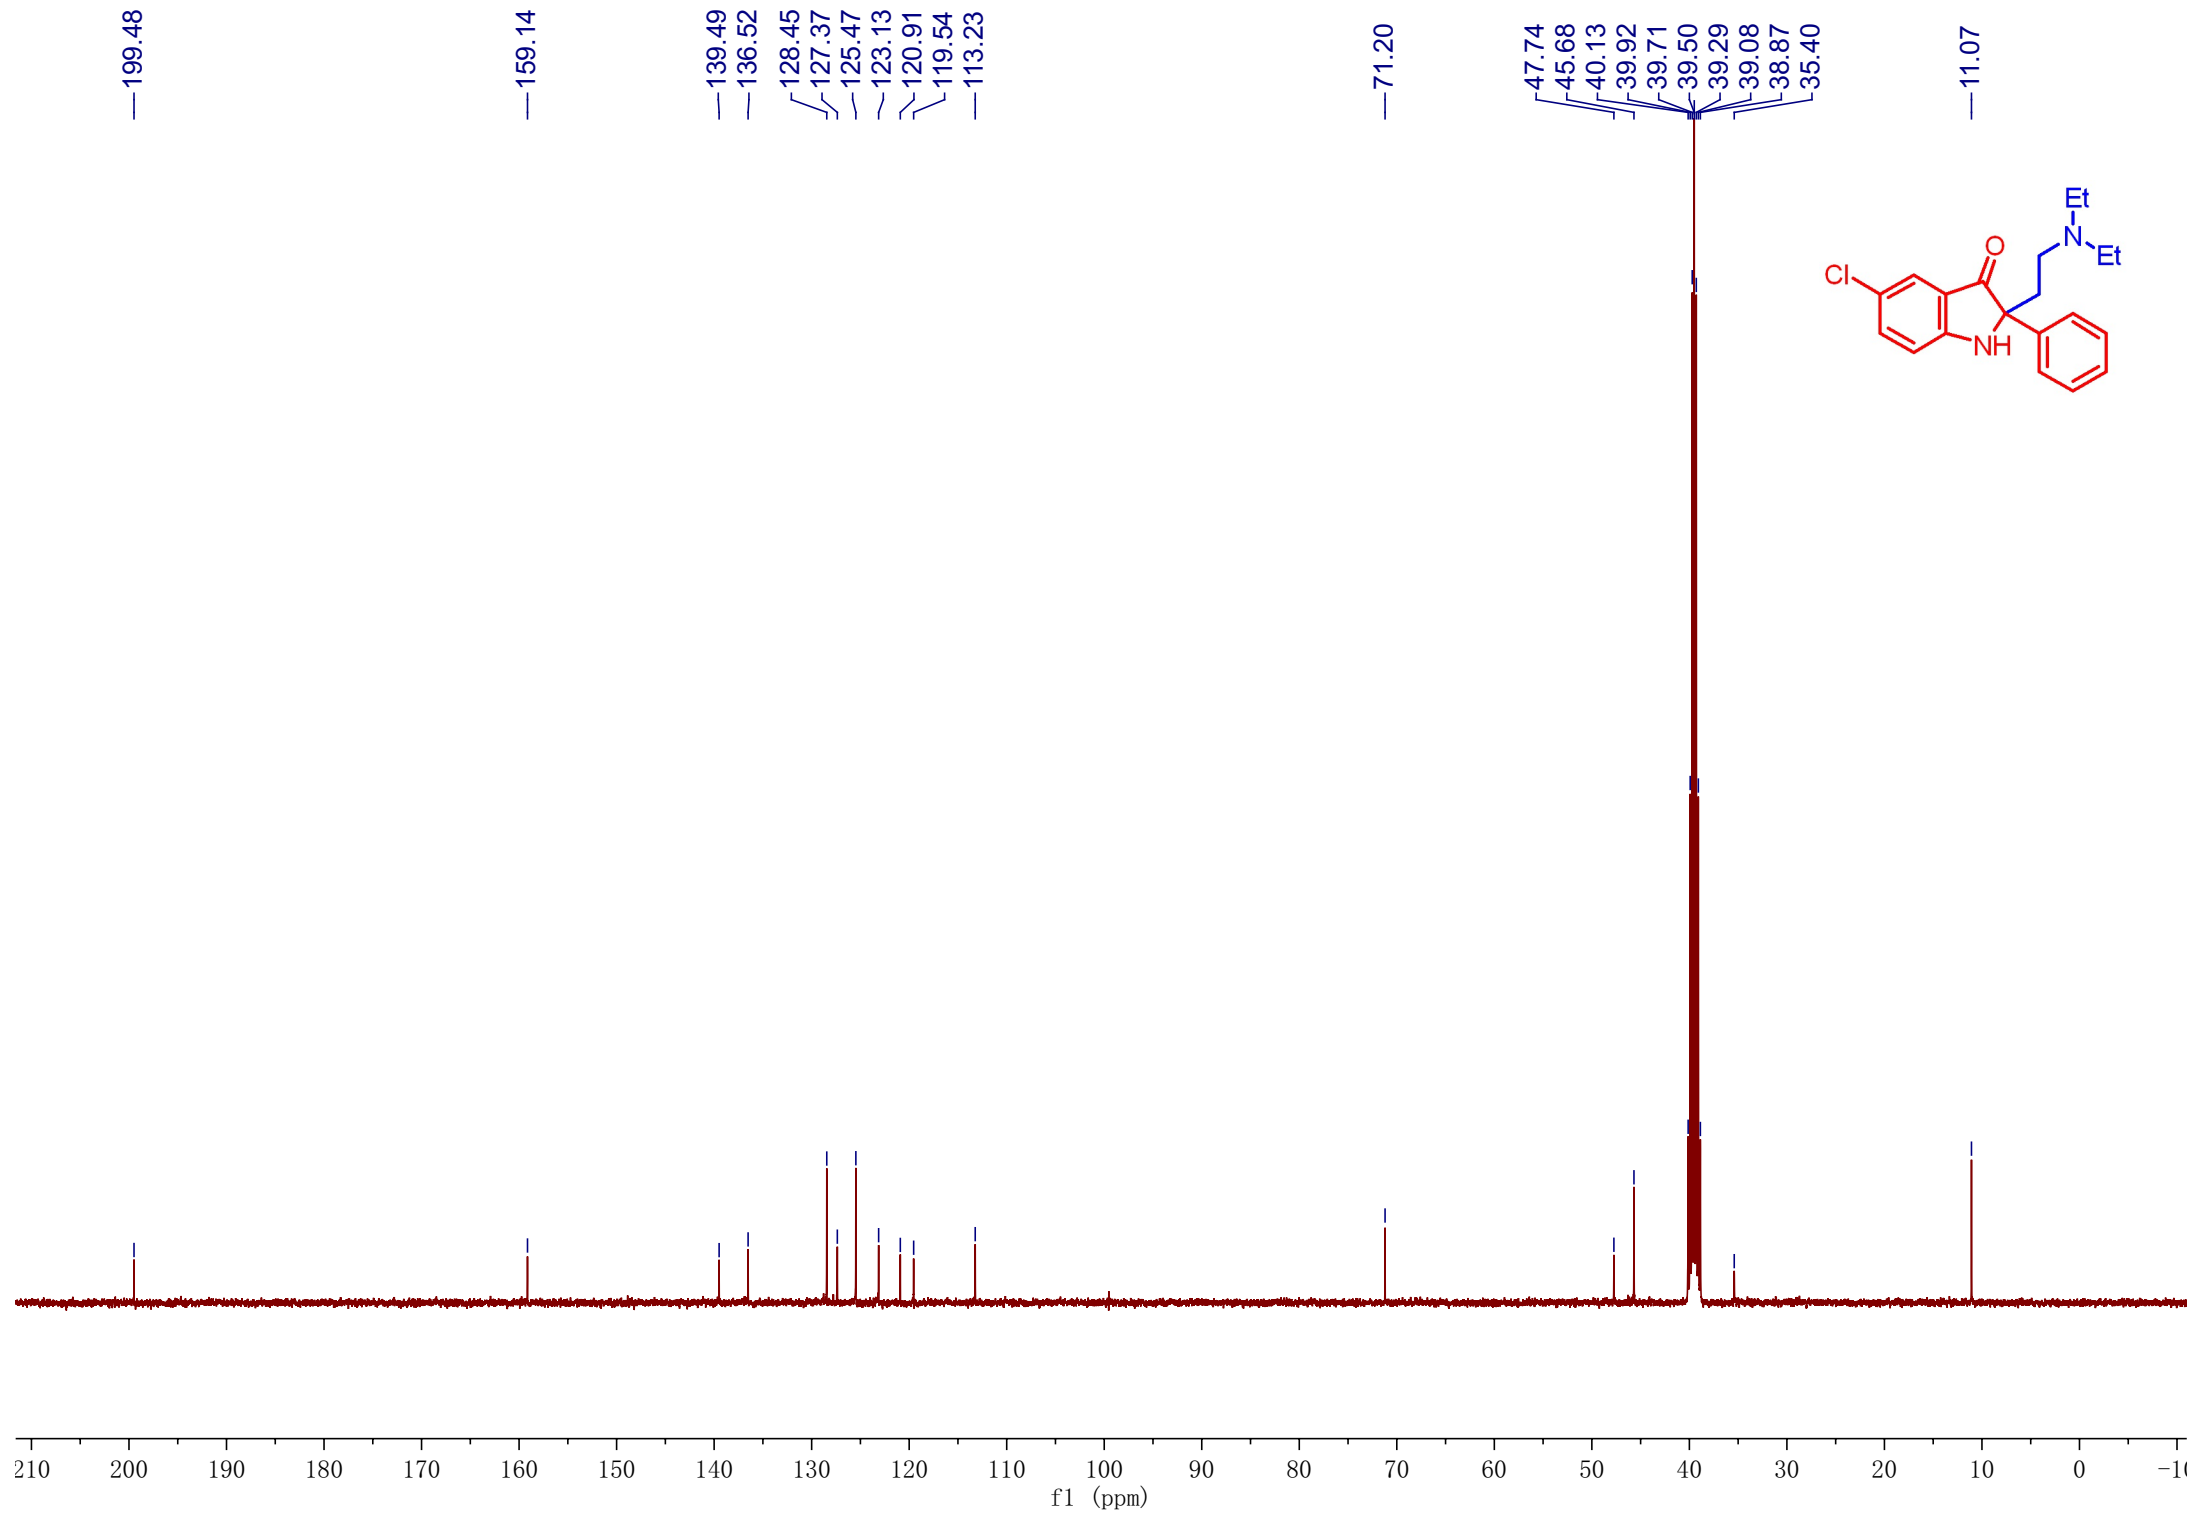

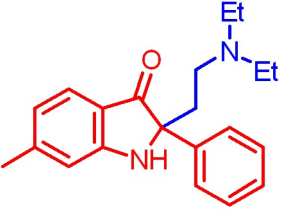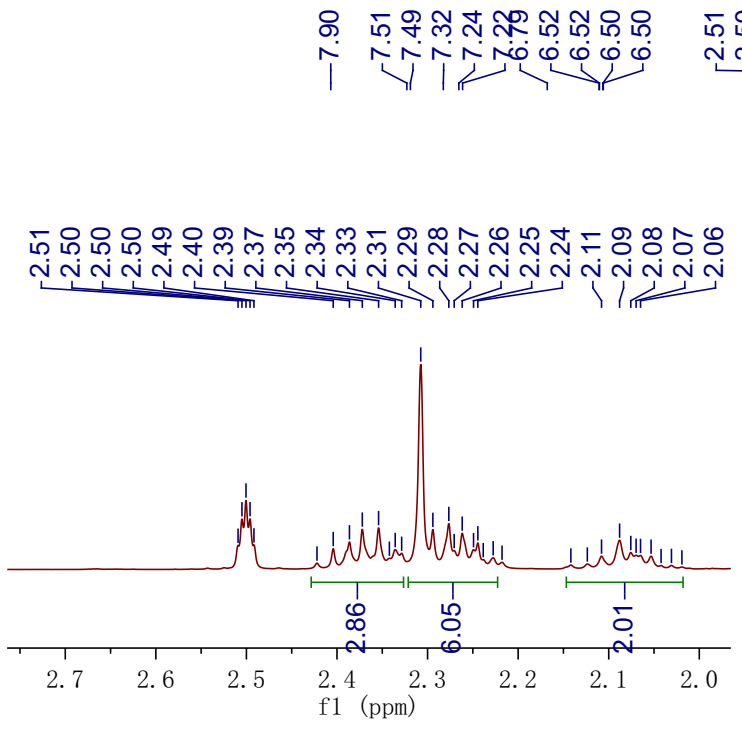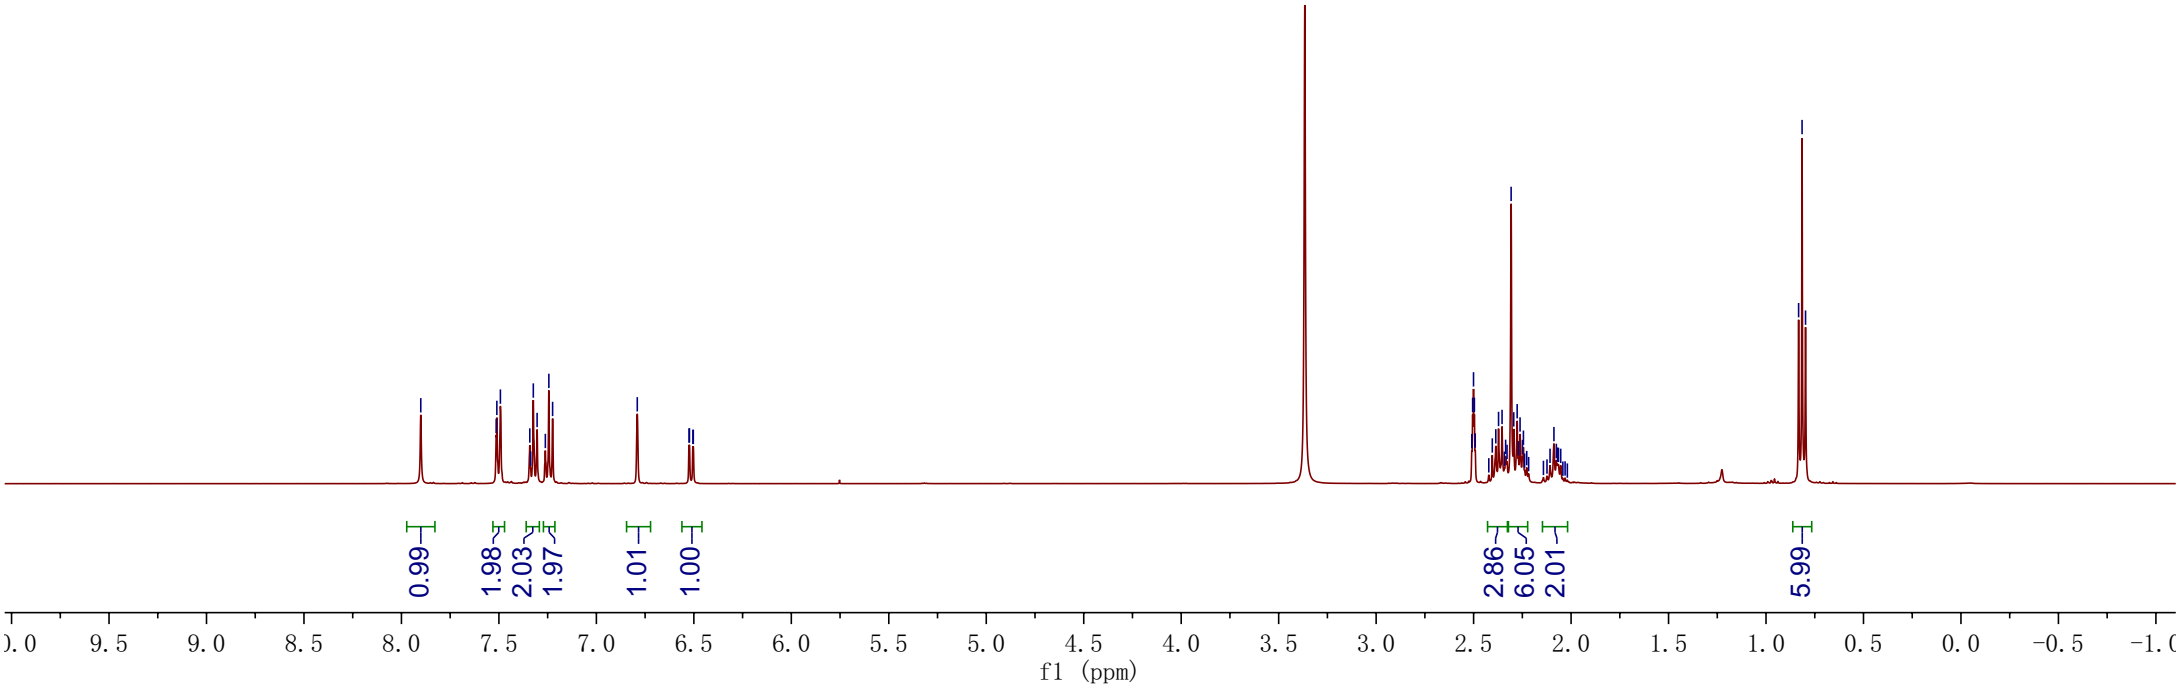



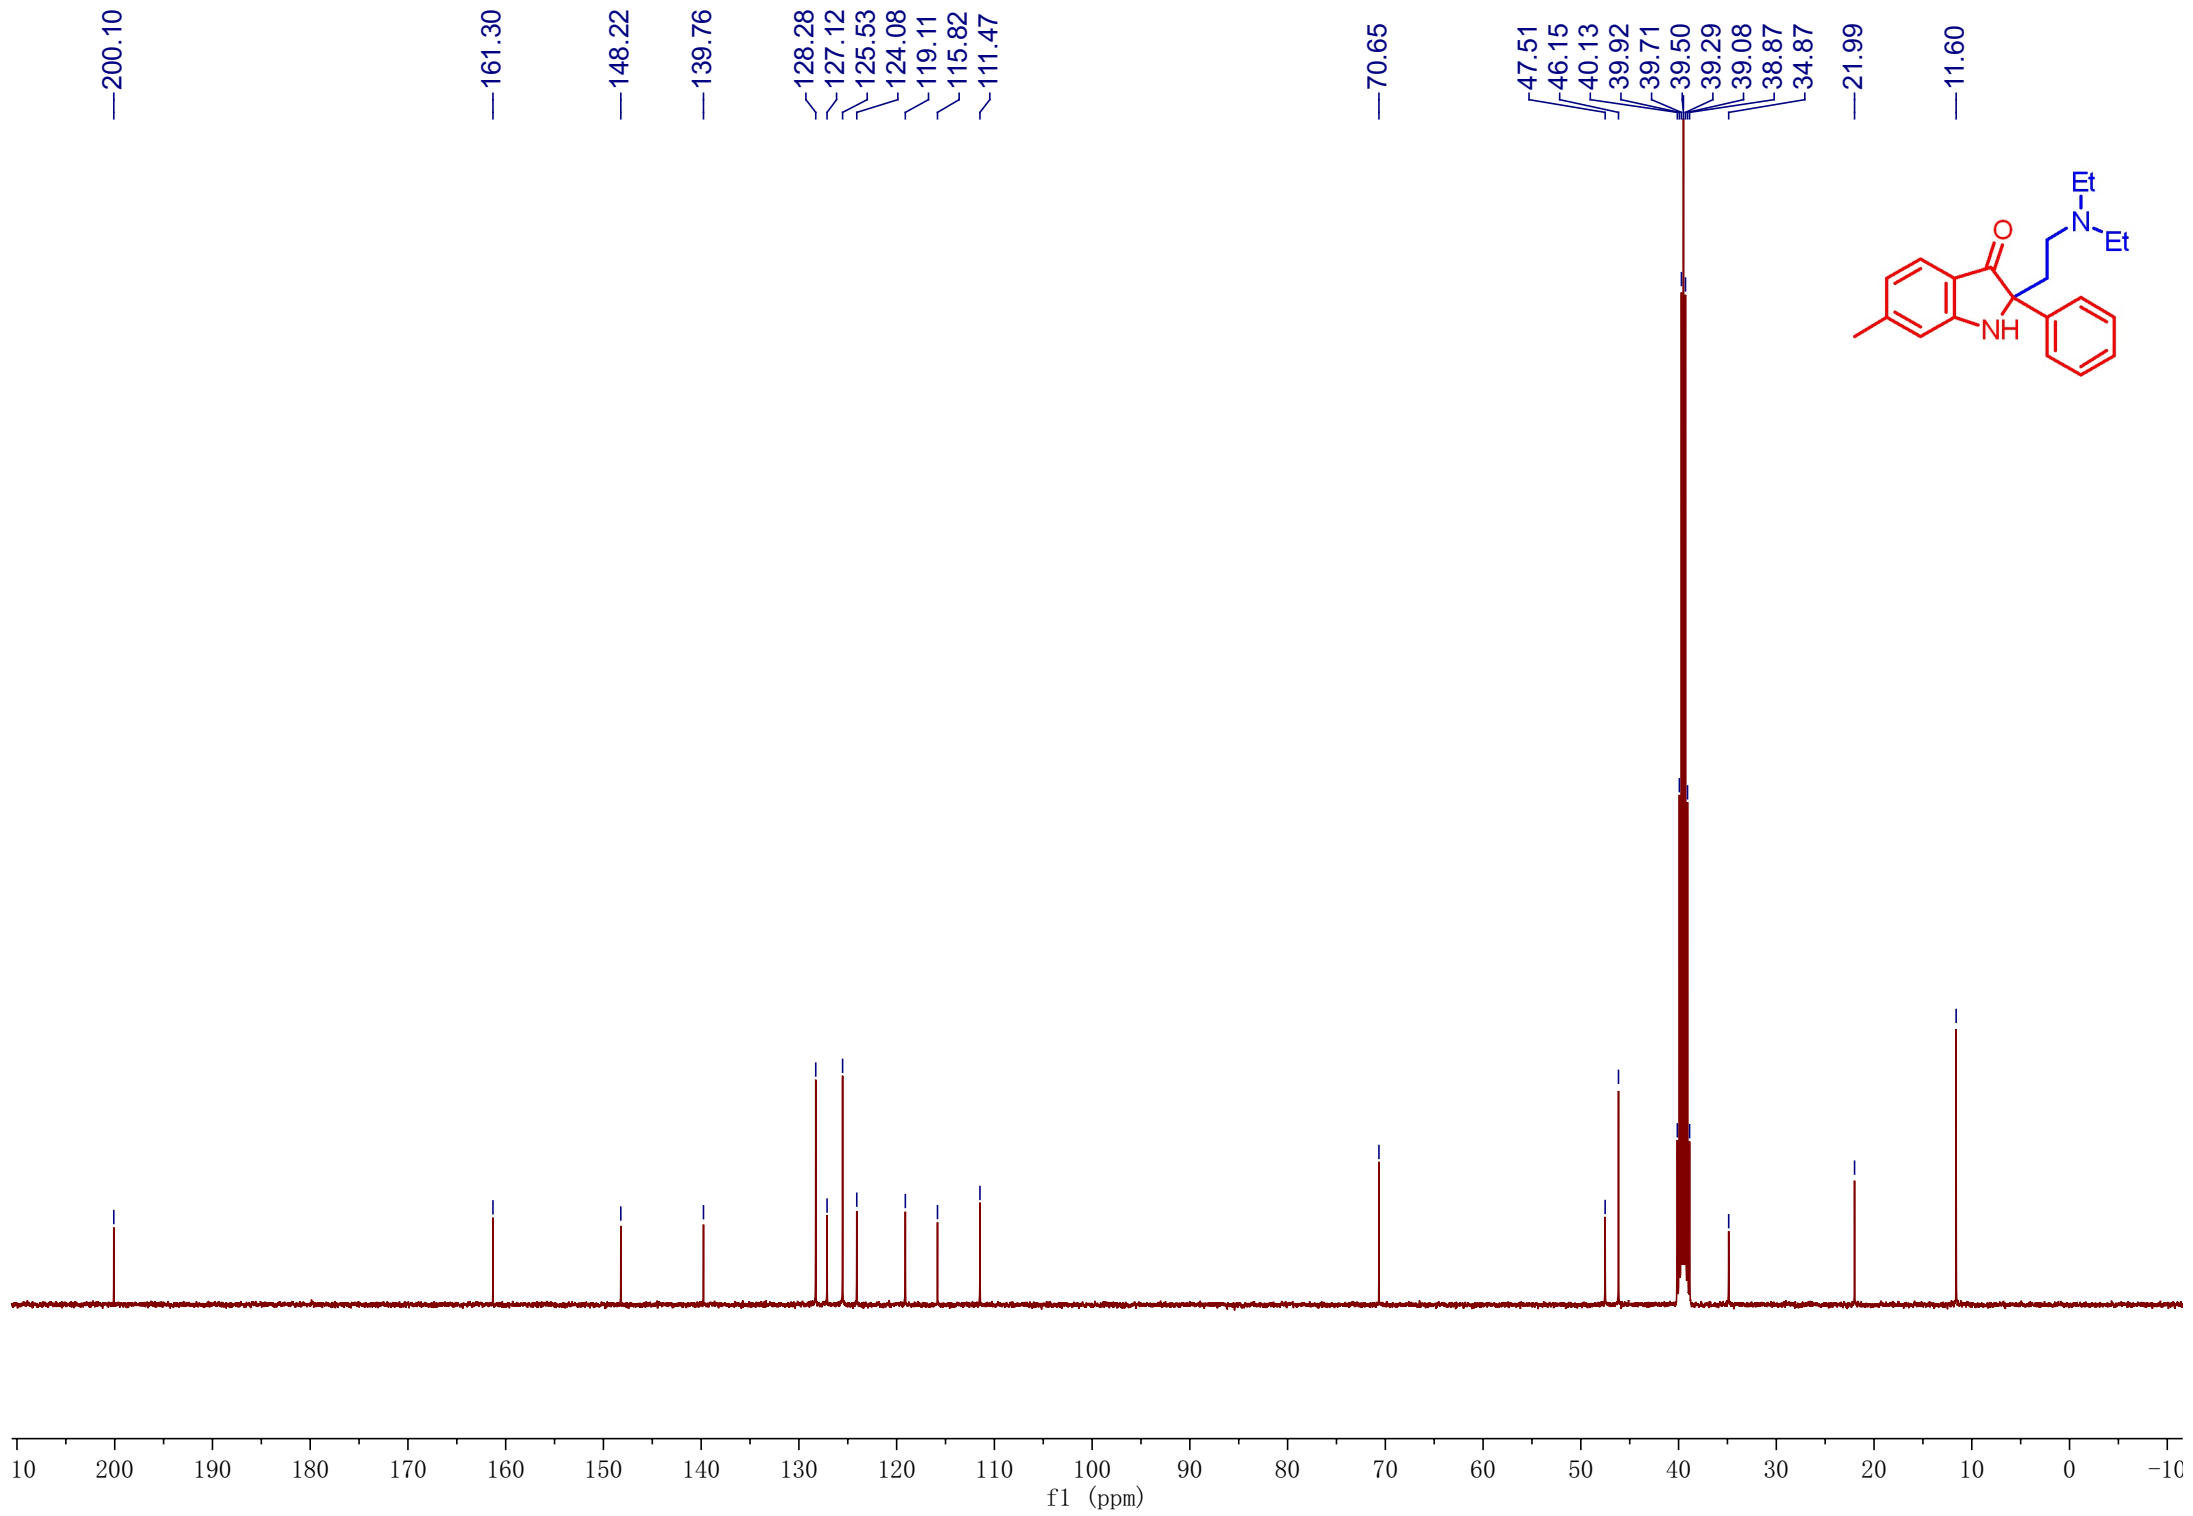

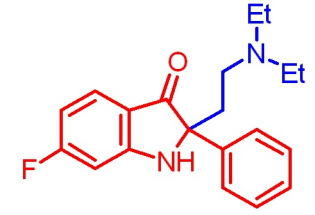

2.50  
2.50  
2.50  
2.41  
2.39  
2.37  
2.36  
2.34  
2.32  
2.27  
2.25  
2.25  
2.24  
2.22  
2.20  
2.19  
2.18  
2.08  
2.06  
2.05  
2.04  
2.01  
2.01  
0.80  
0.78  
0.76

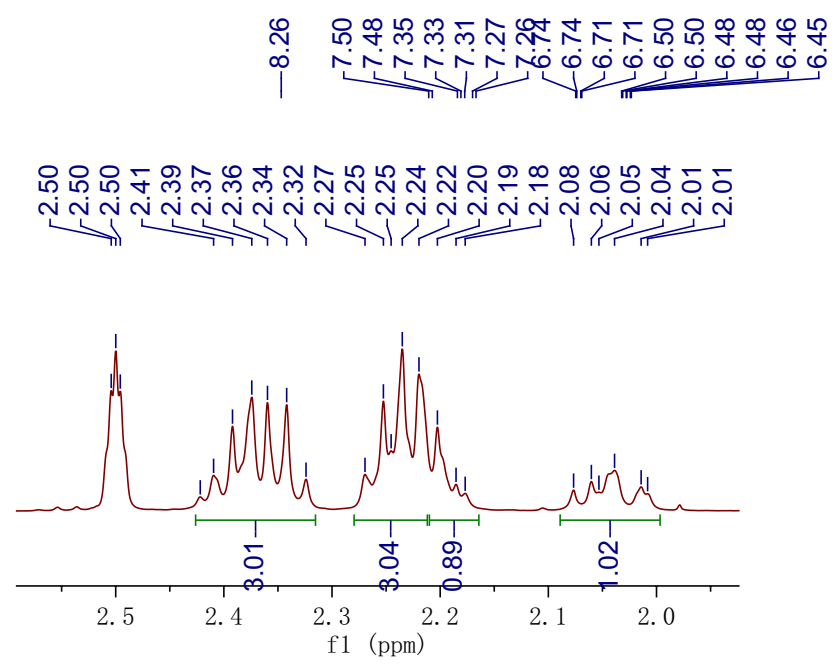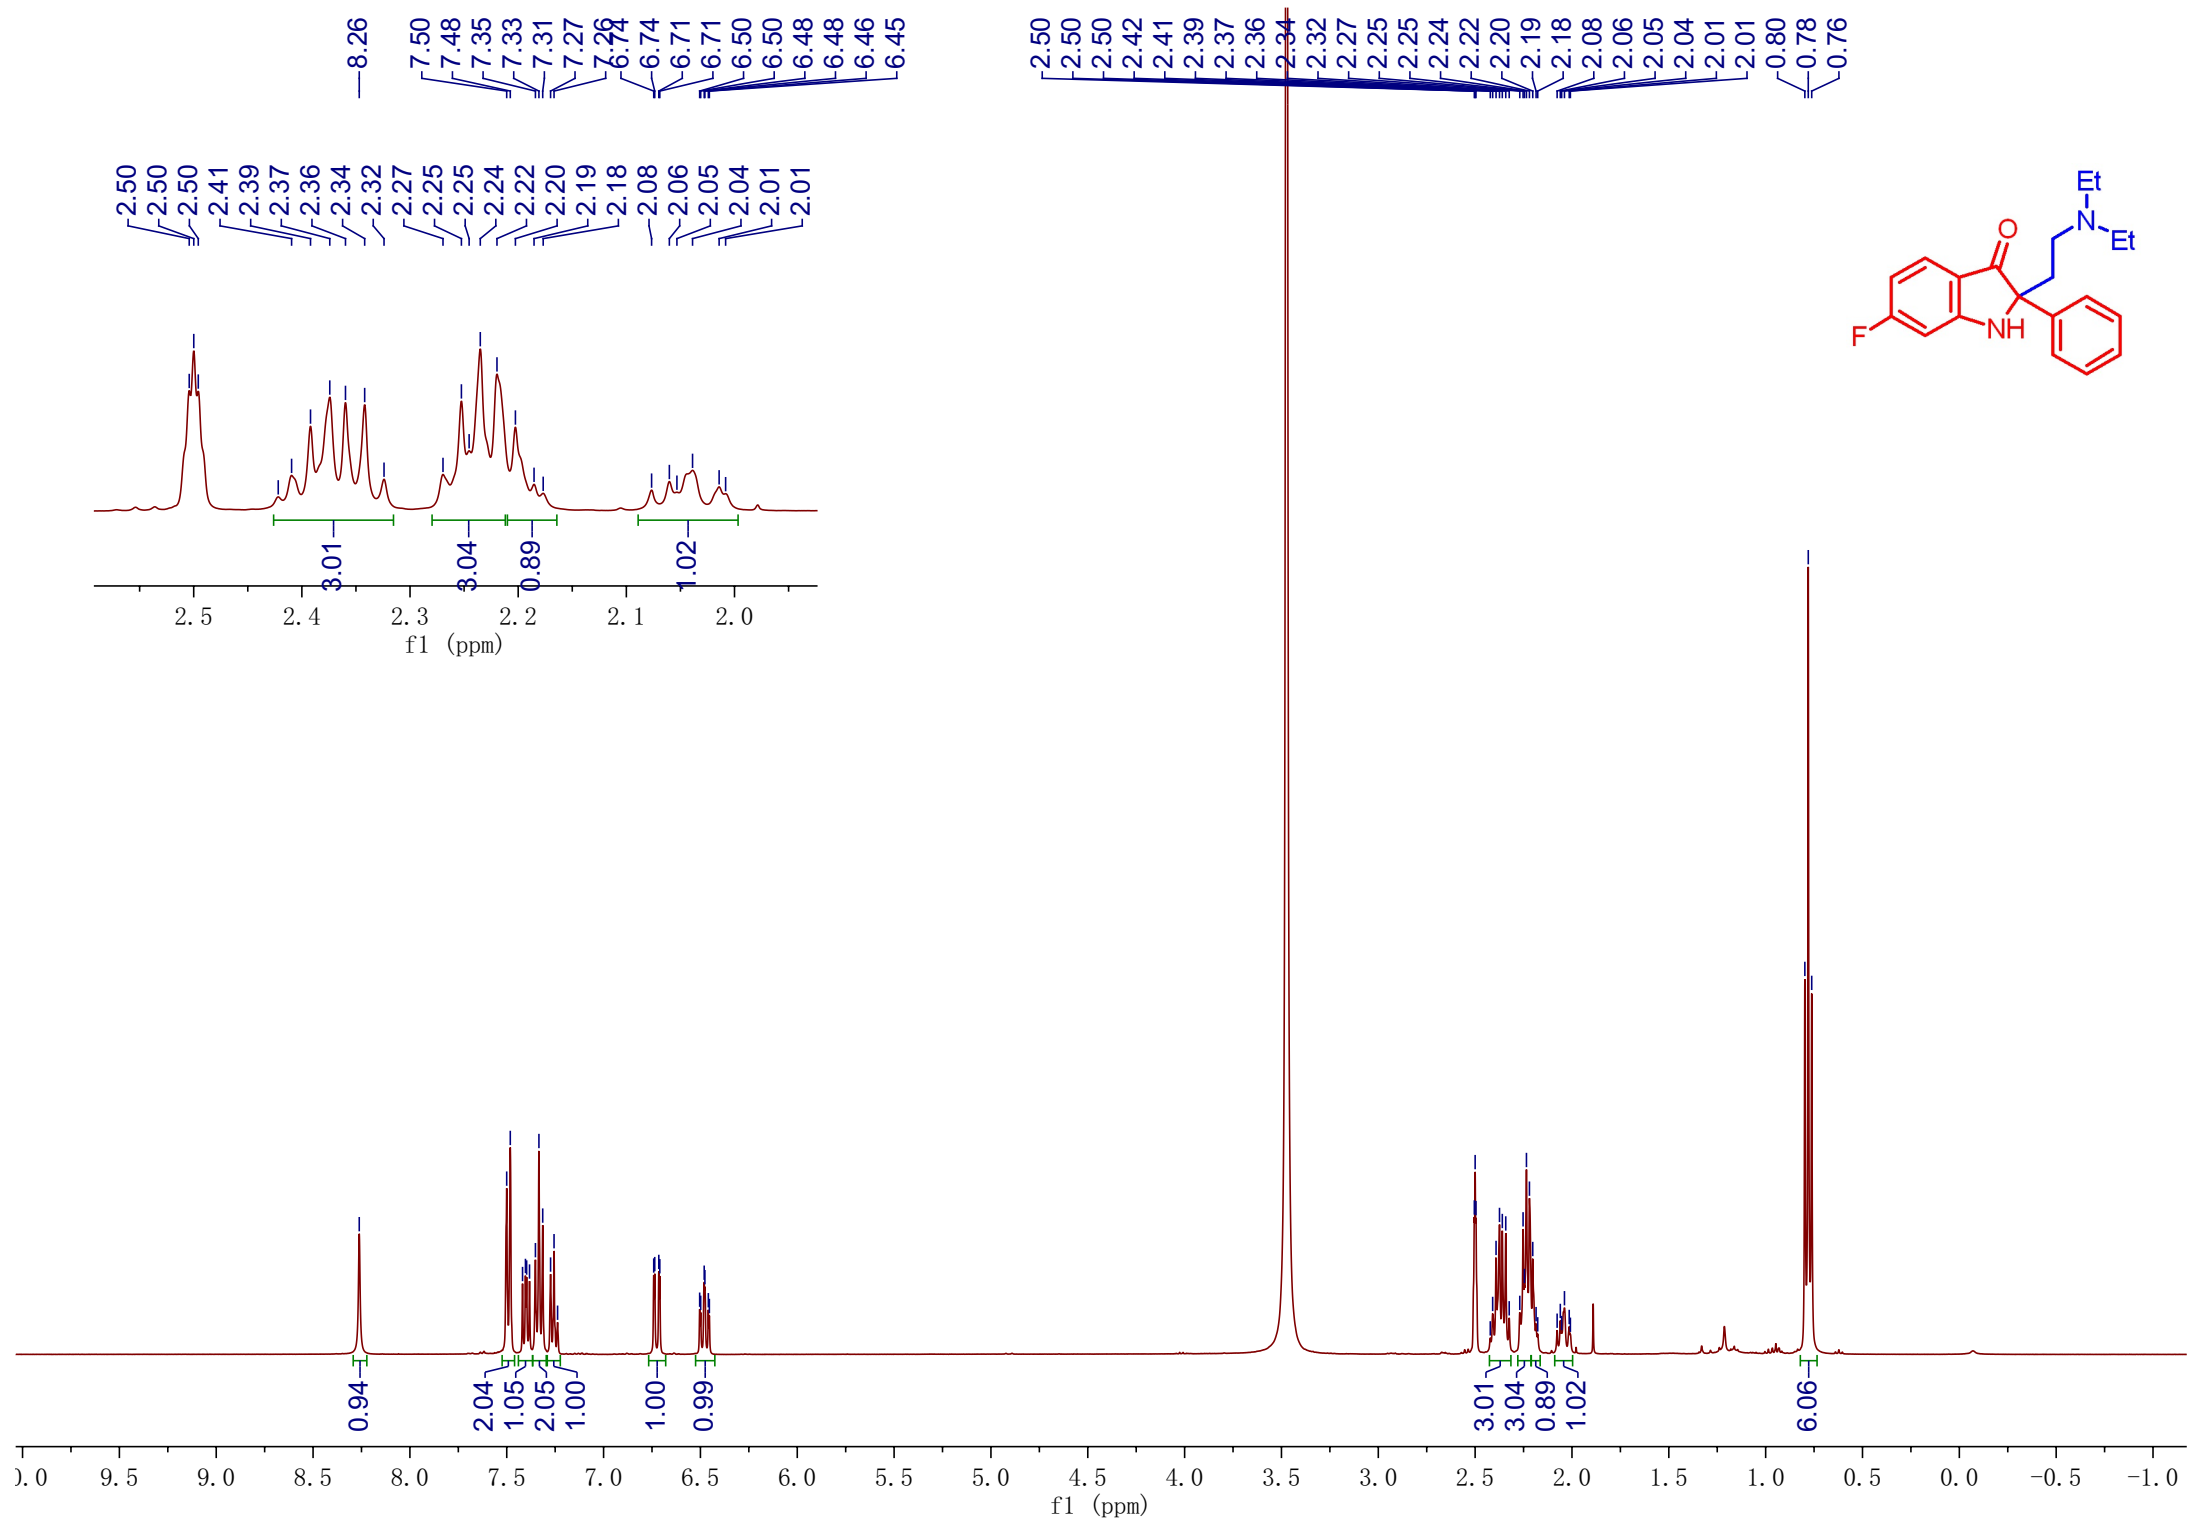

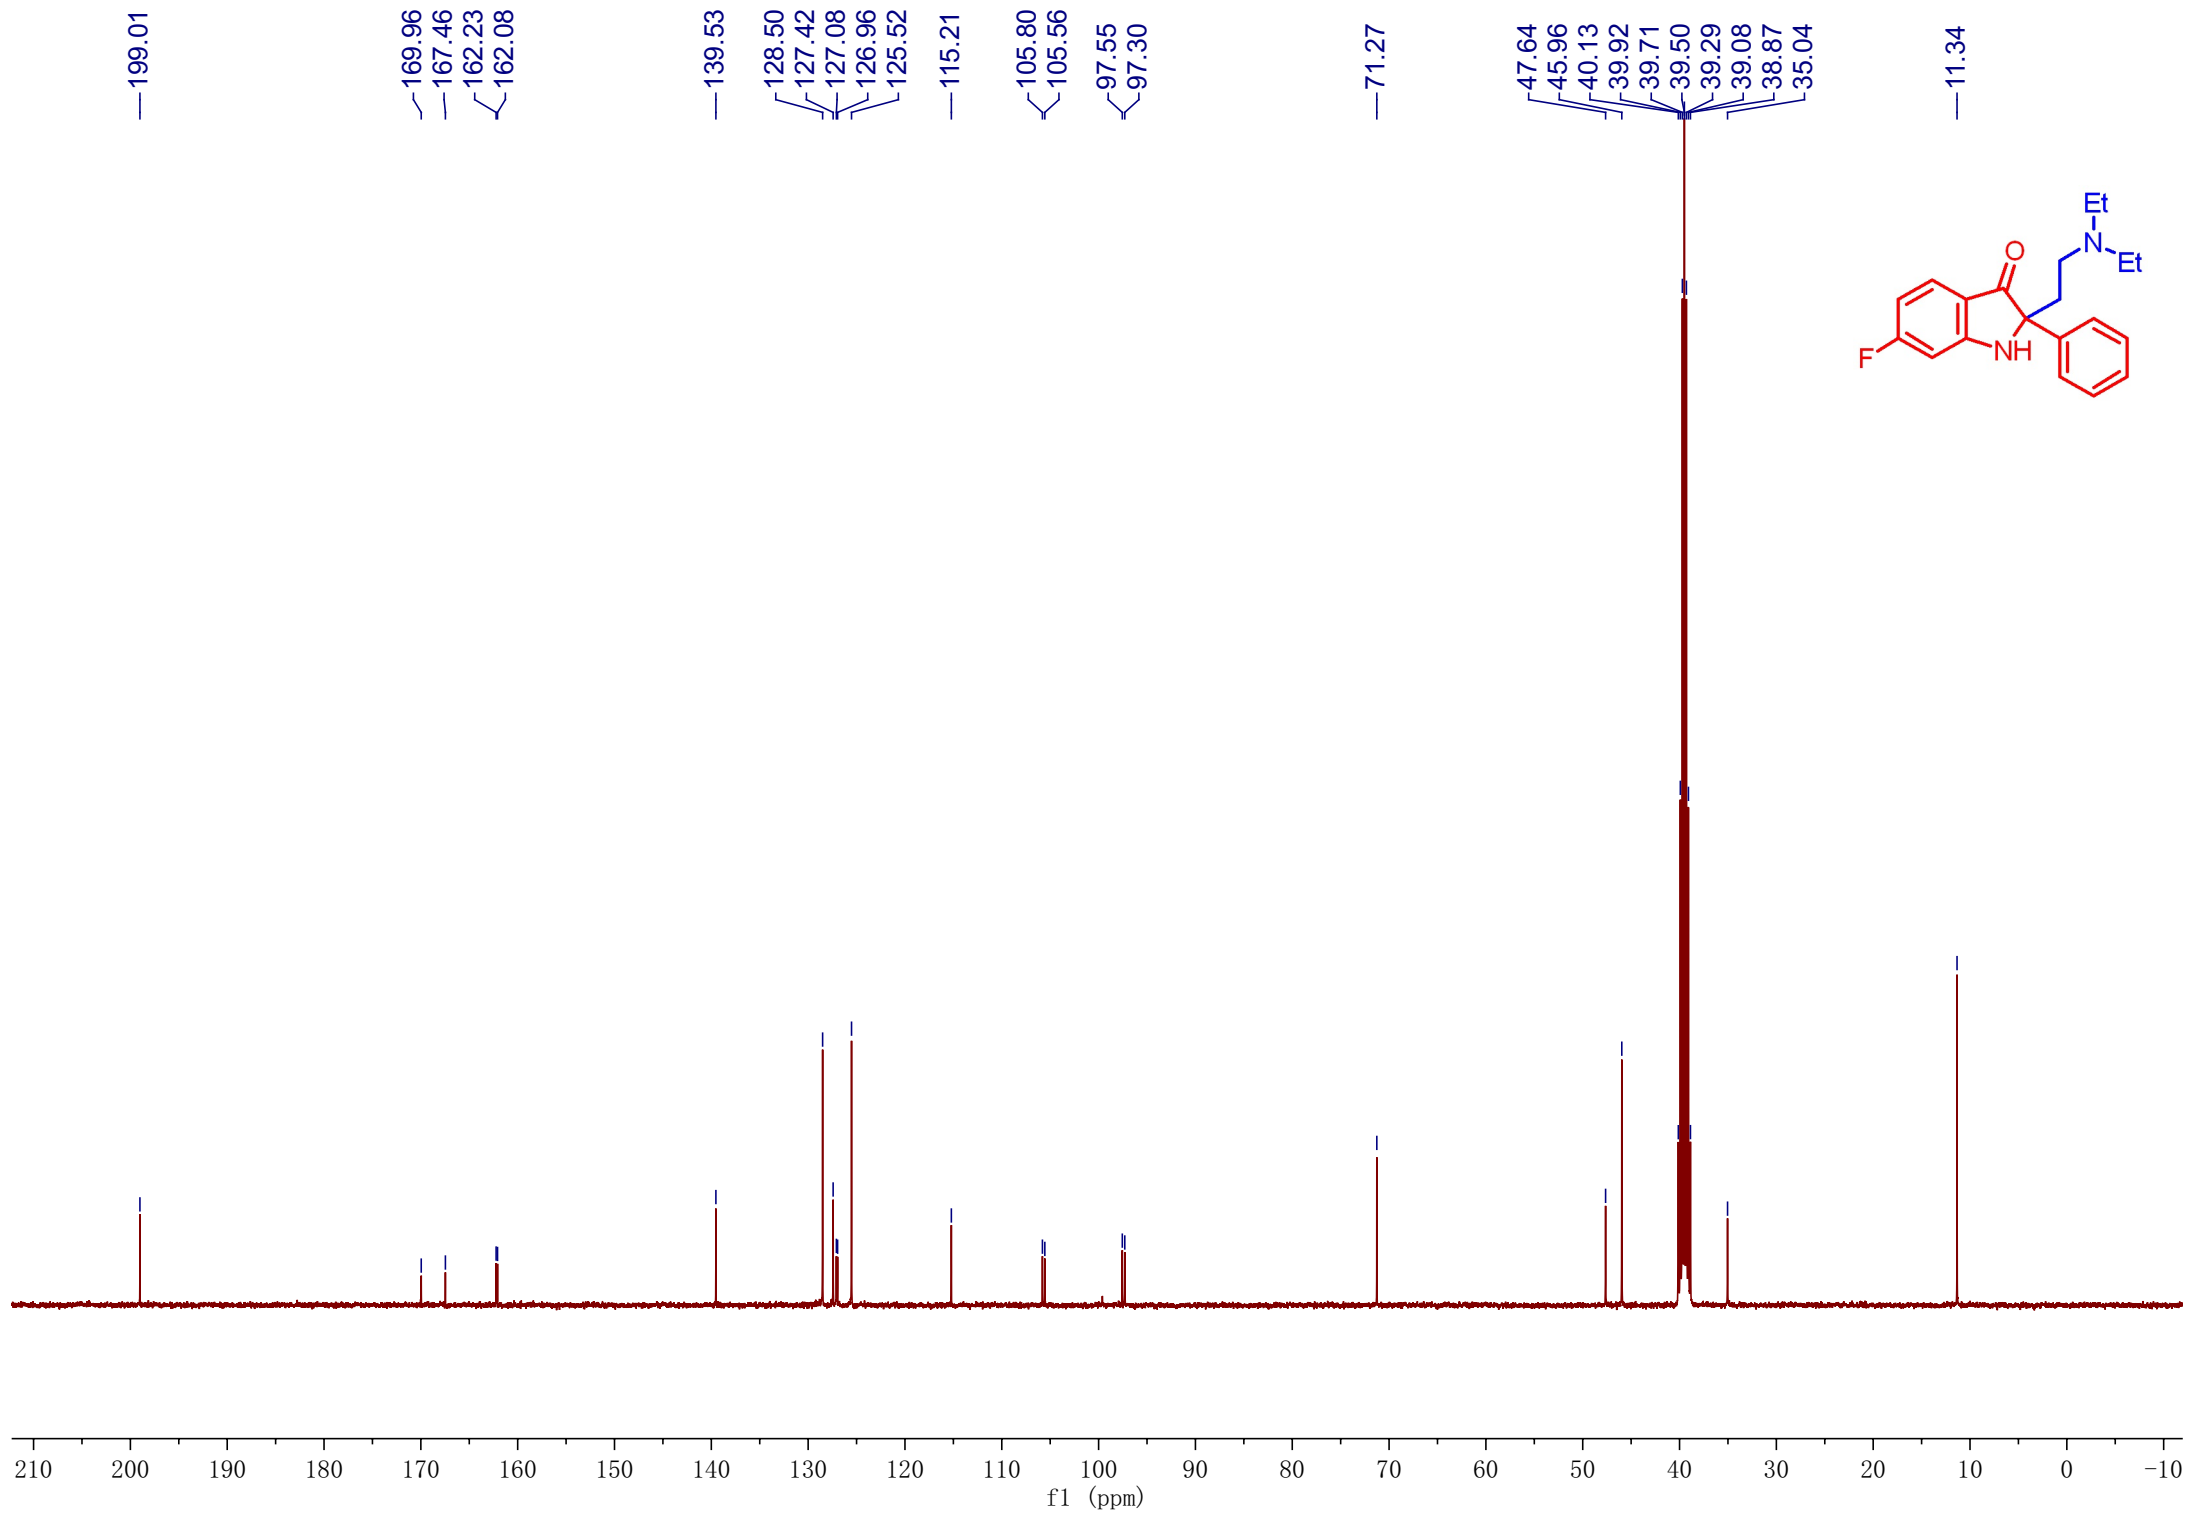

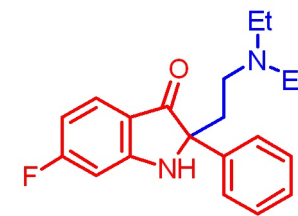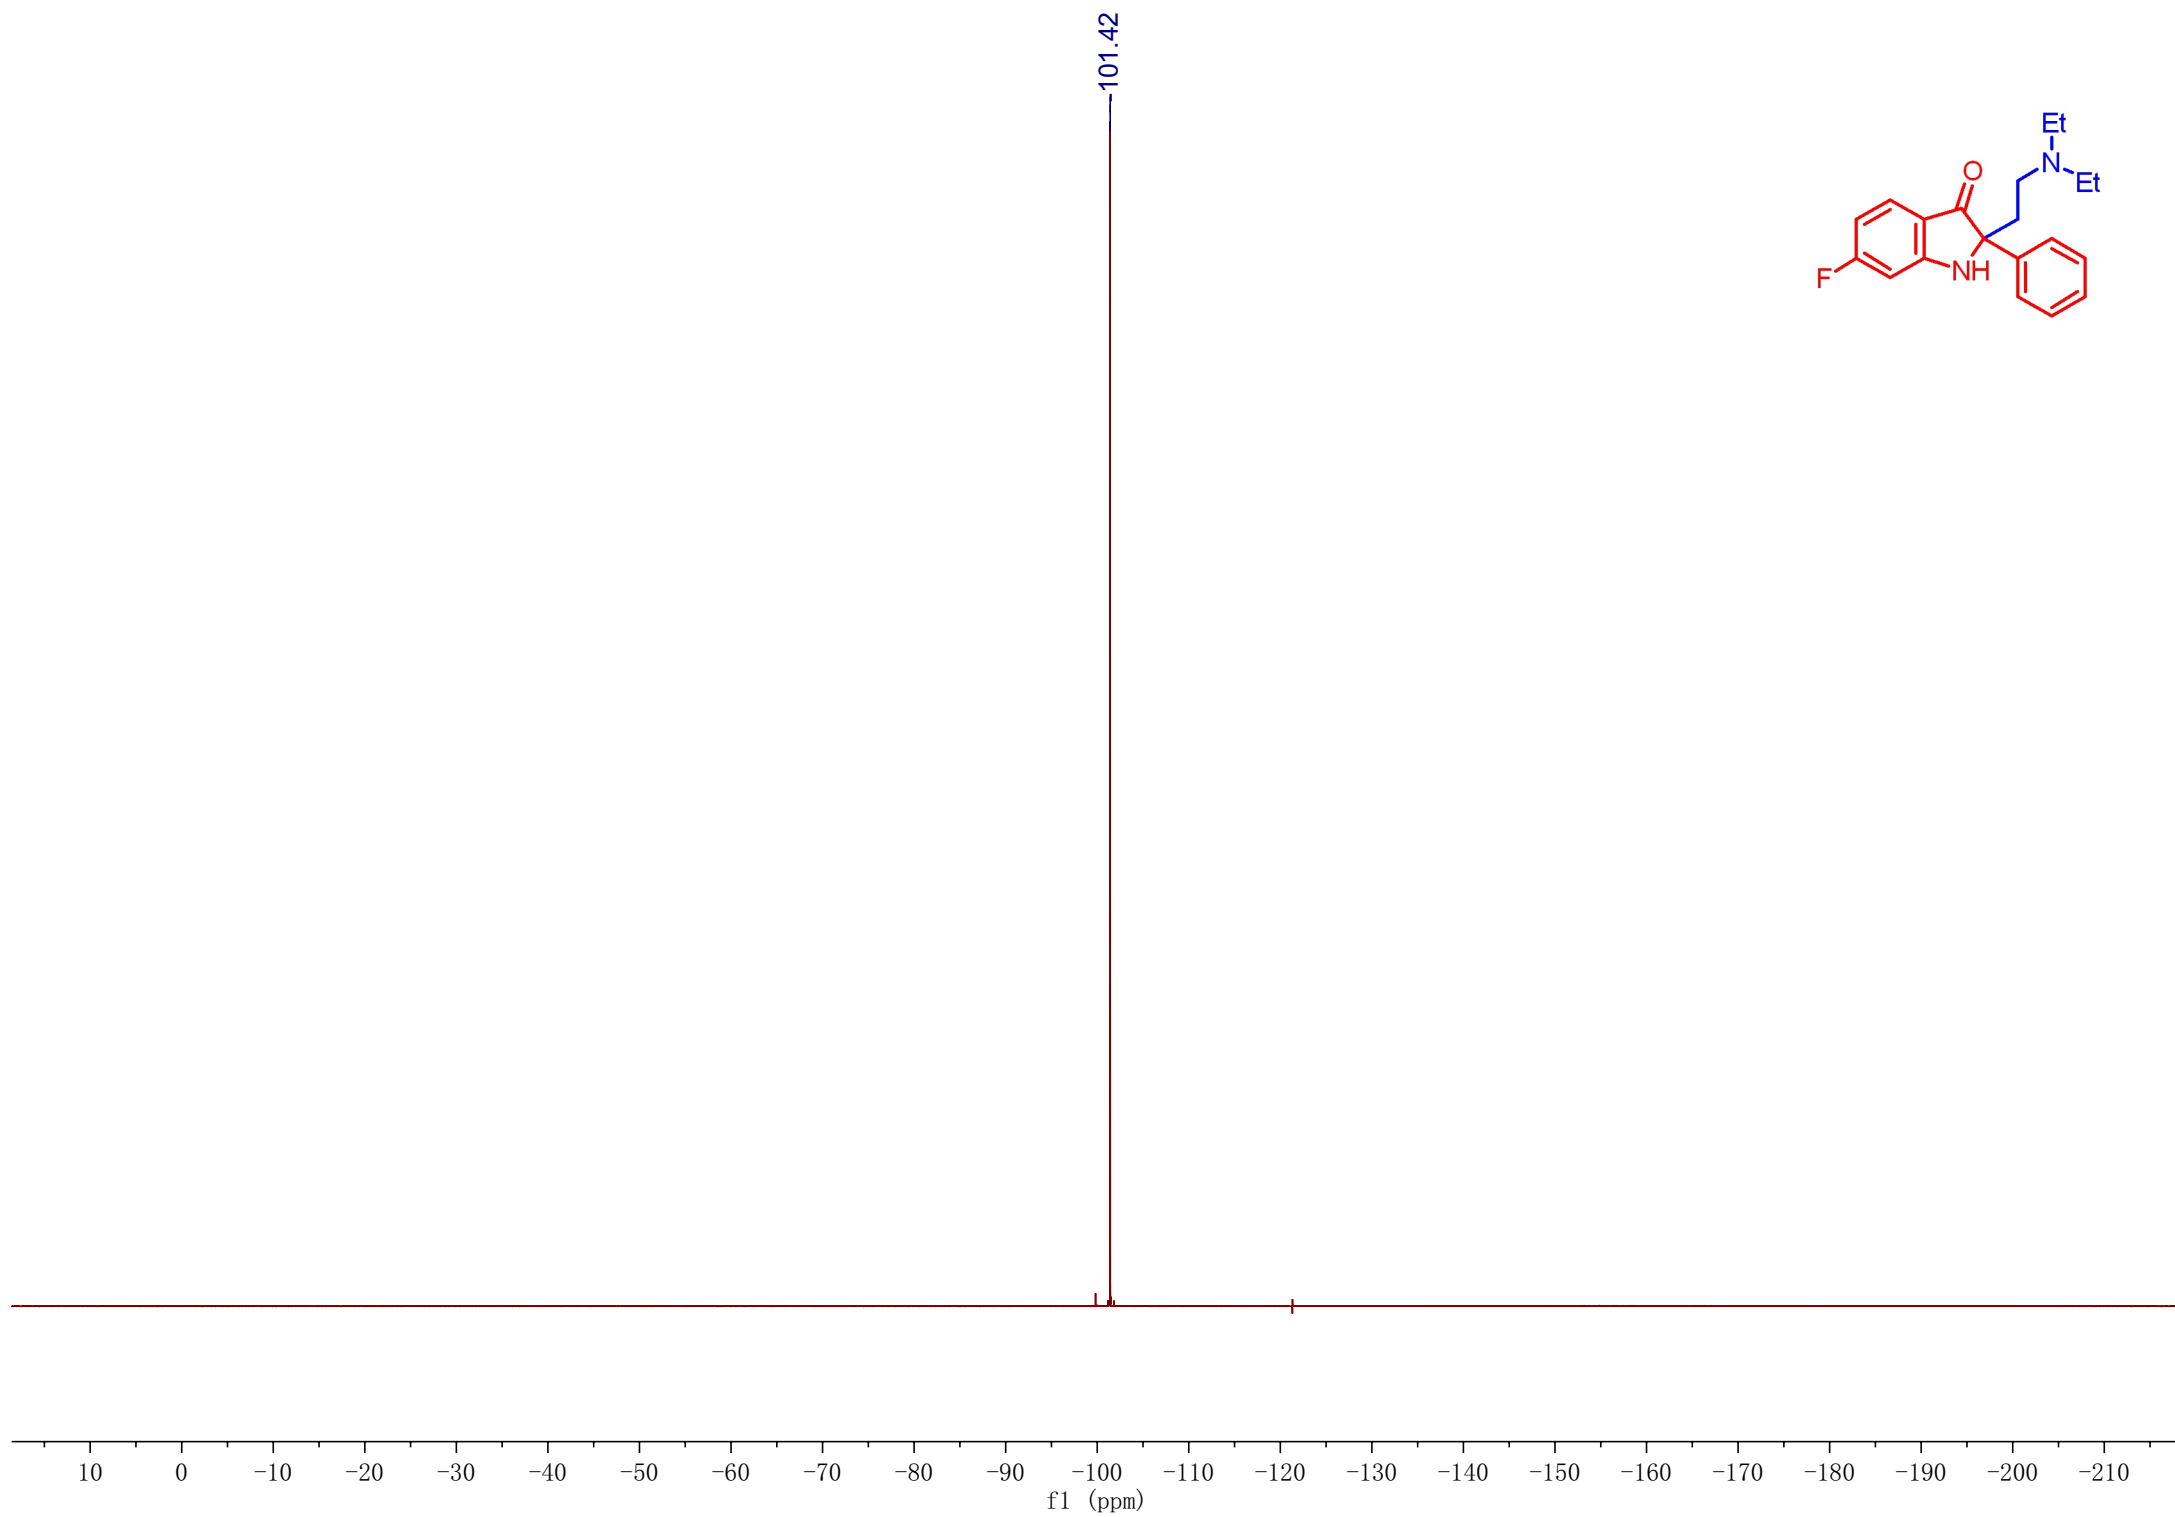

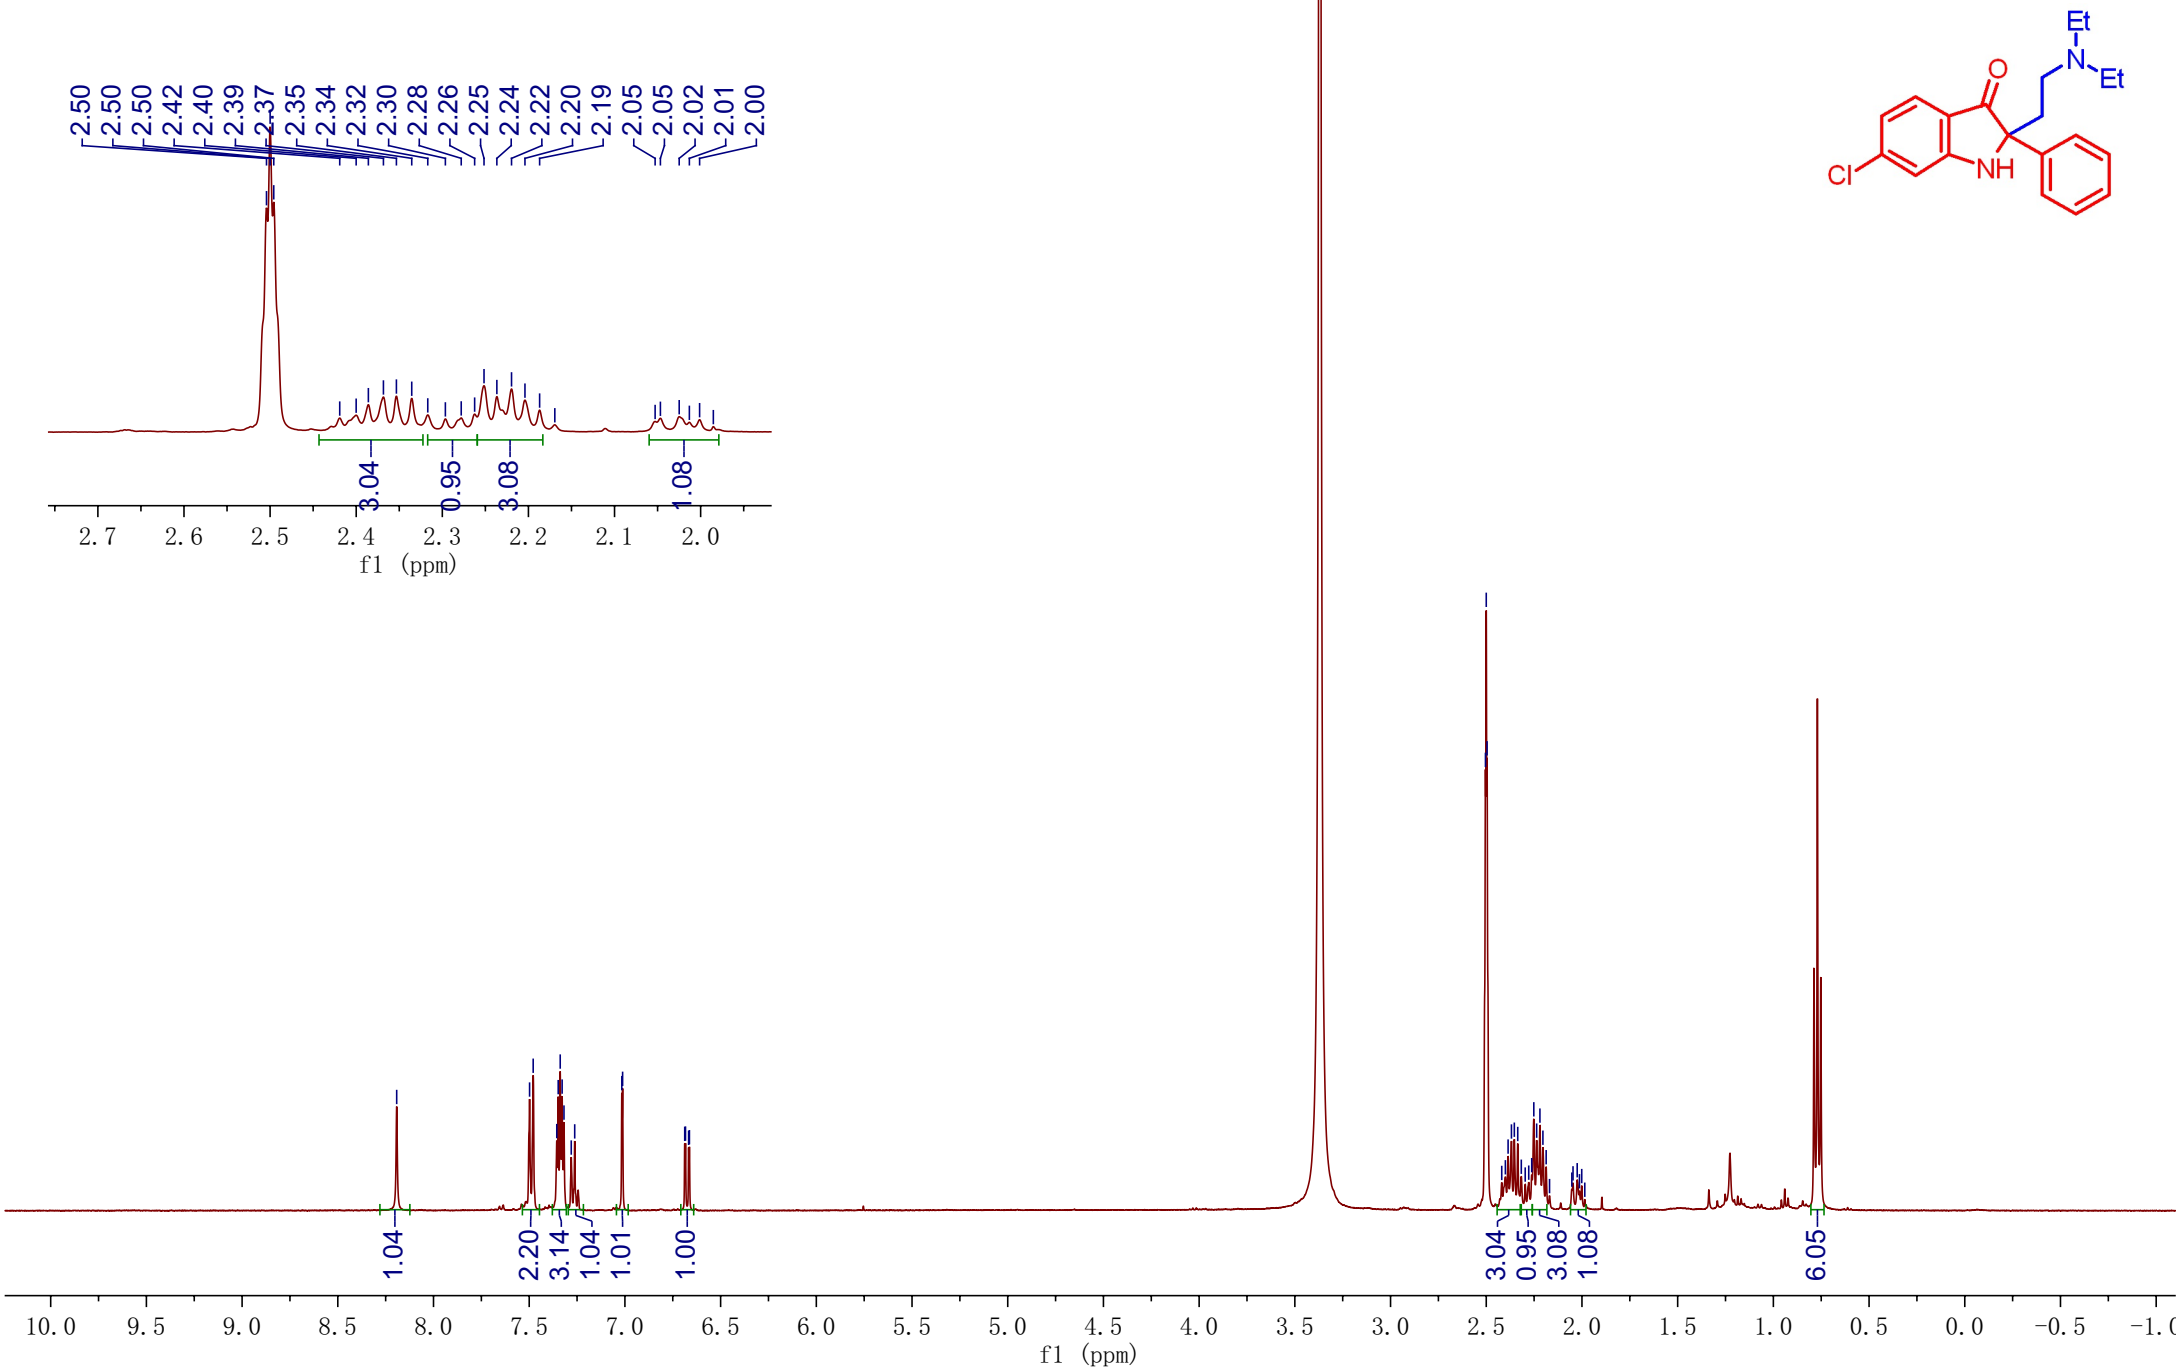

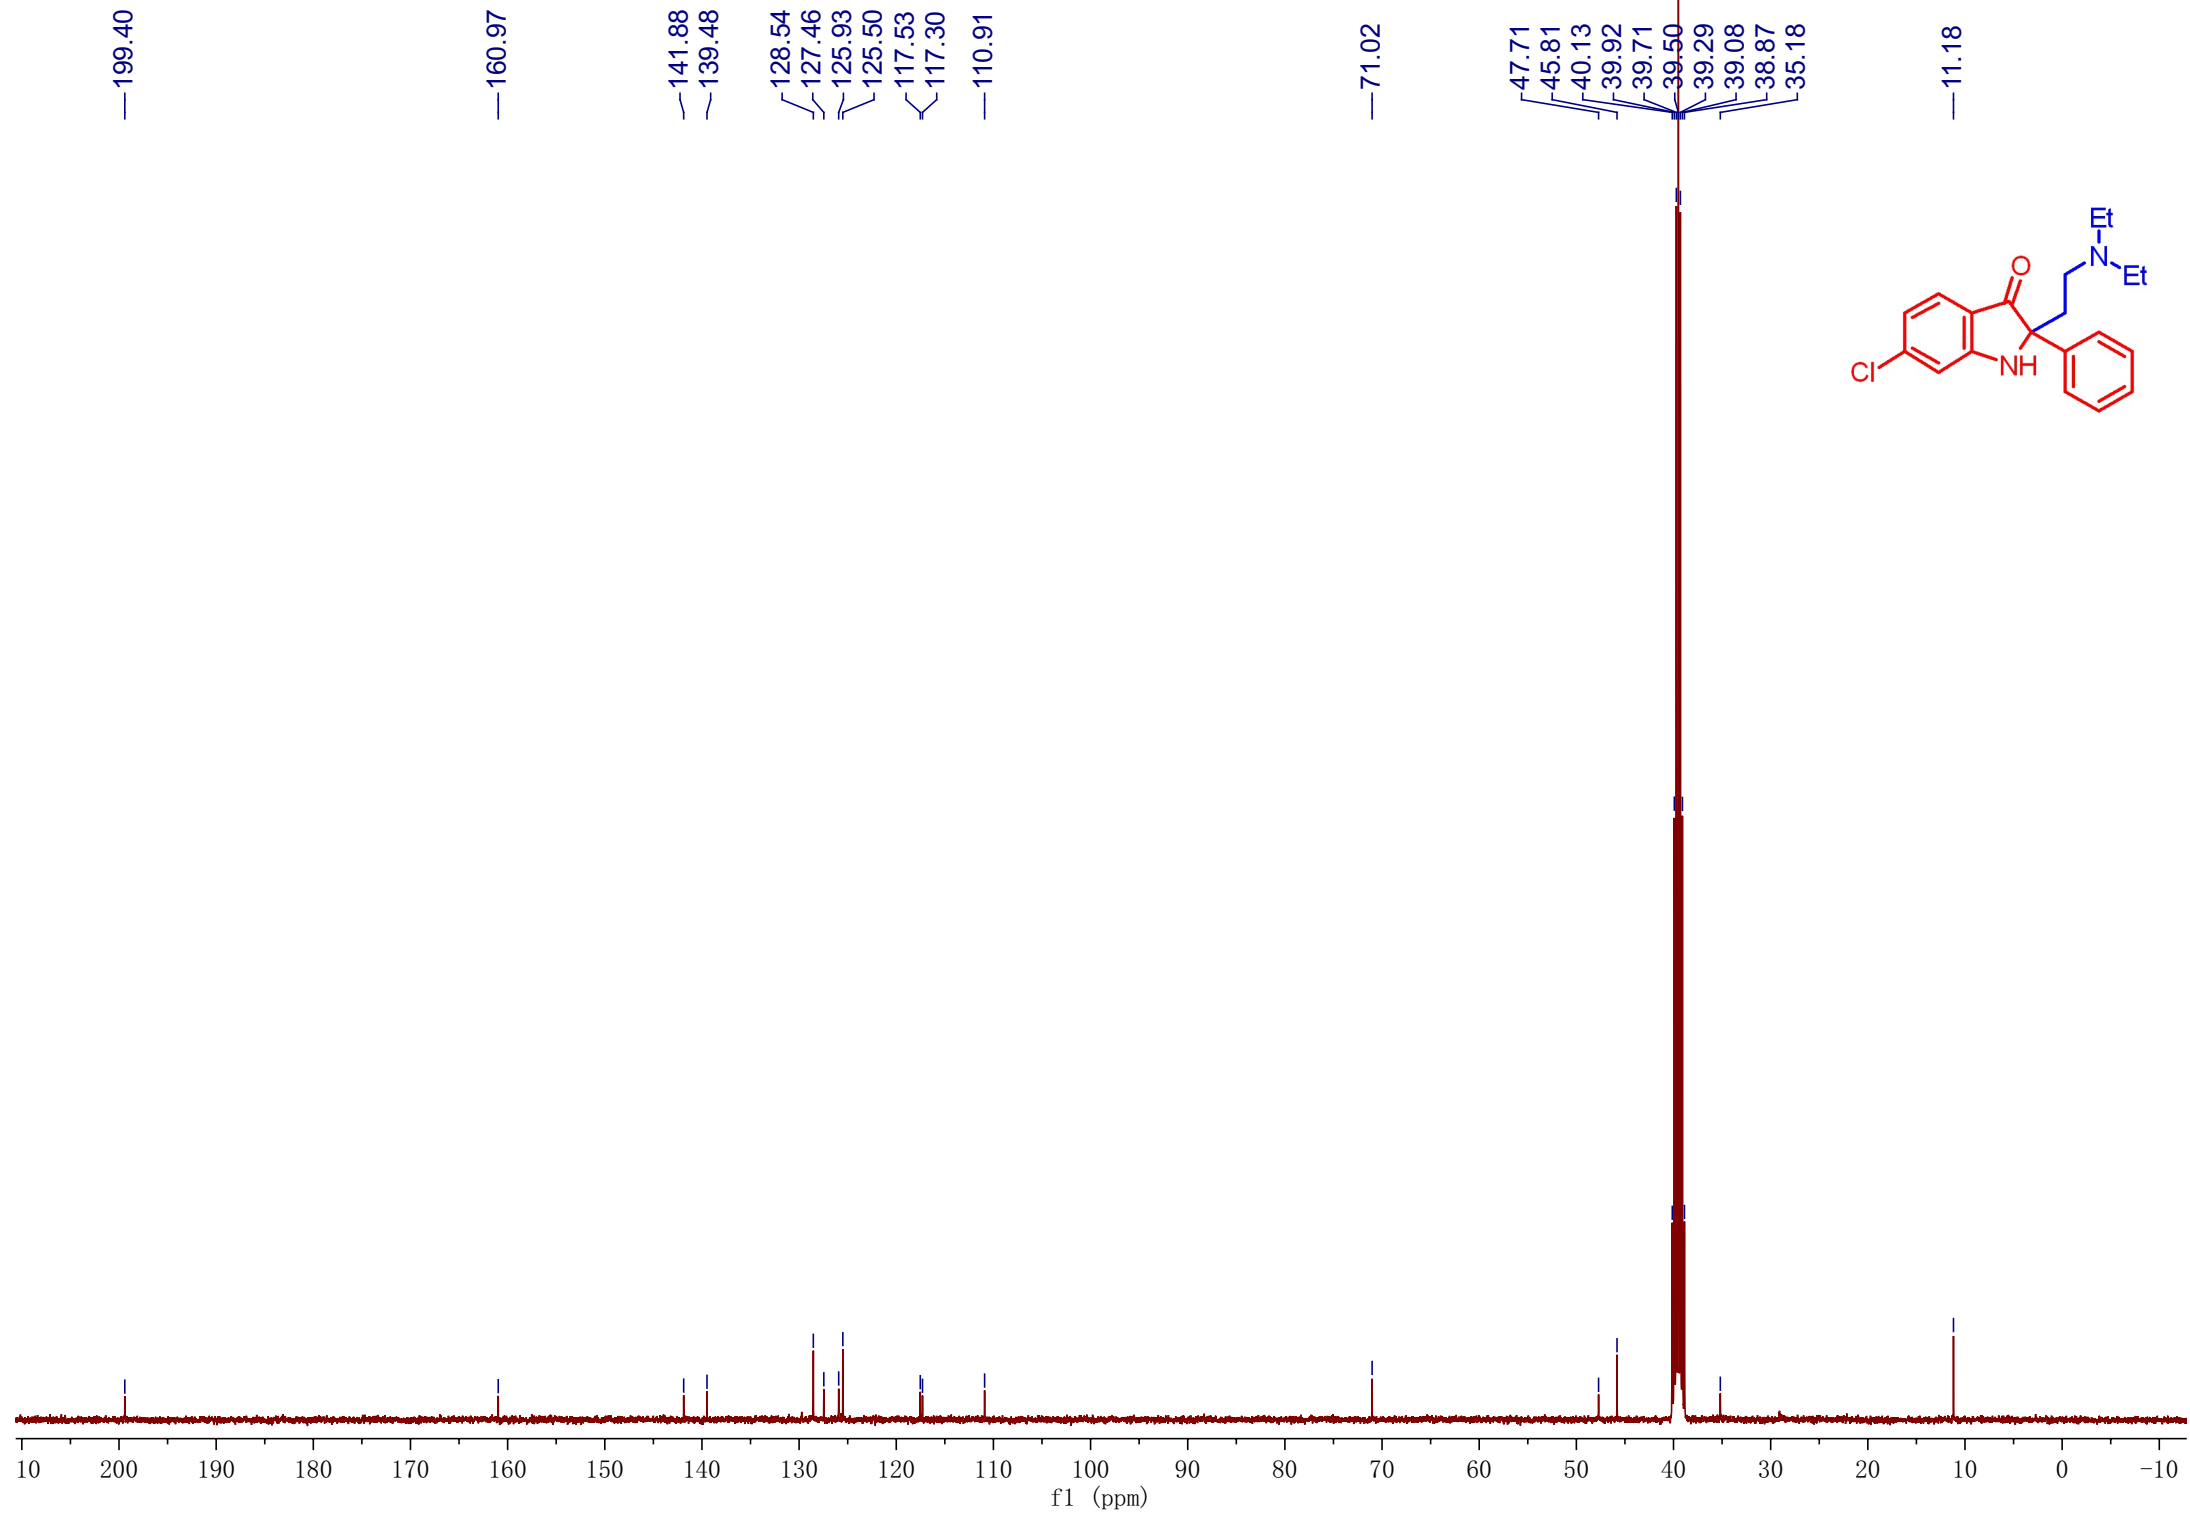

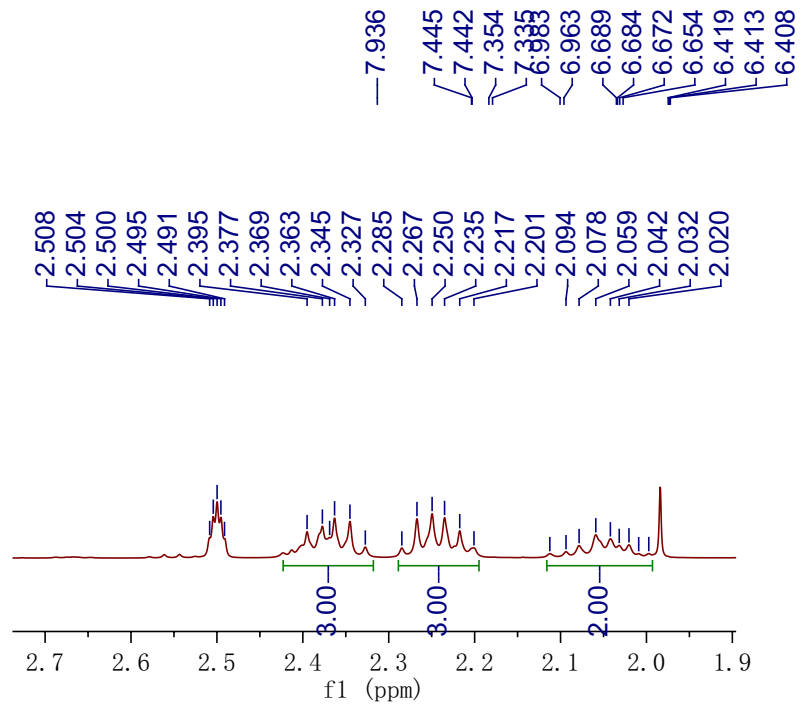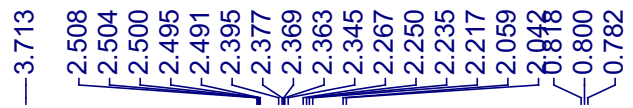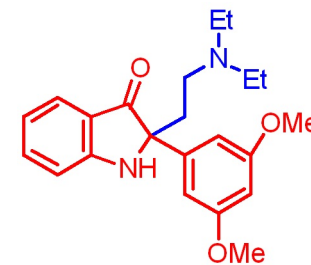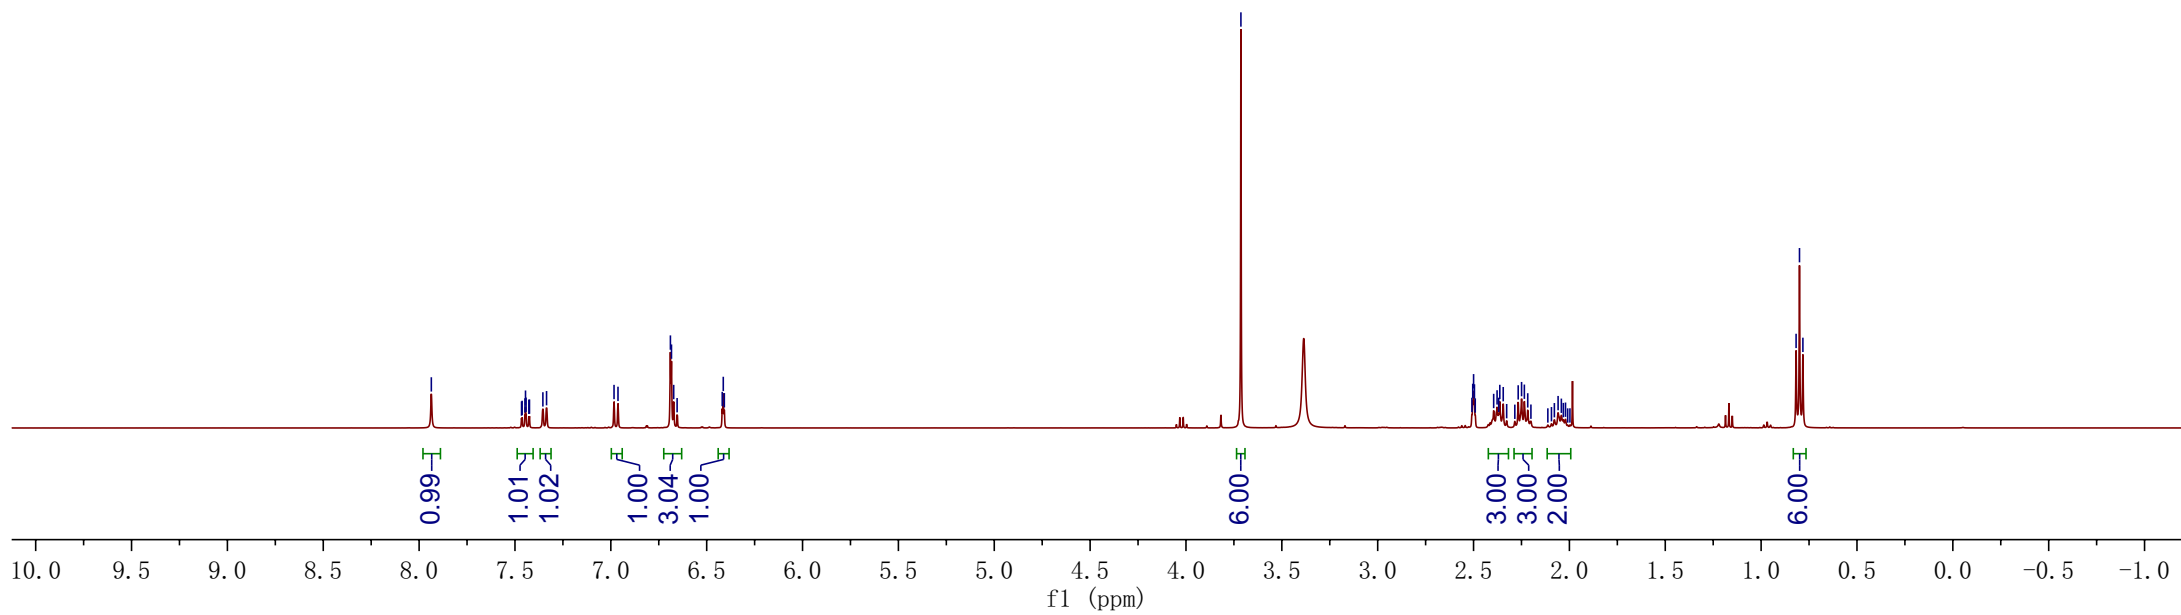

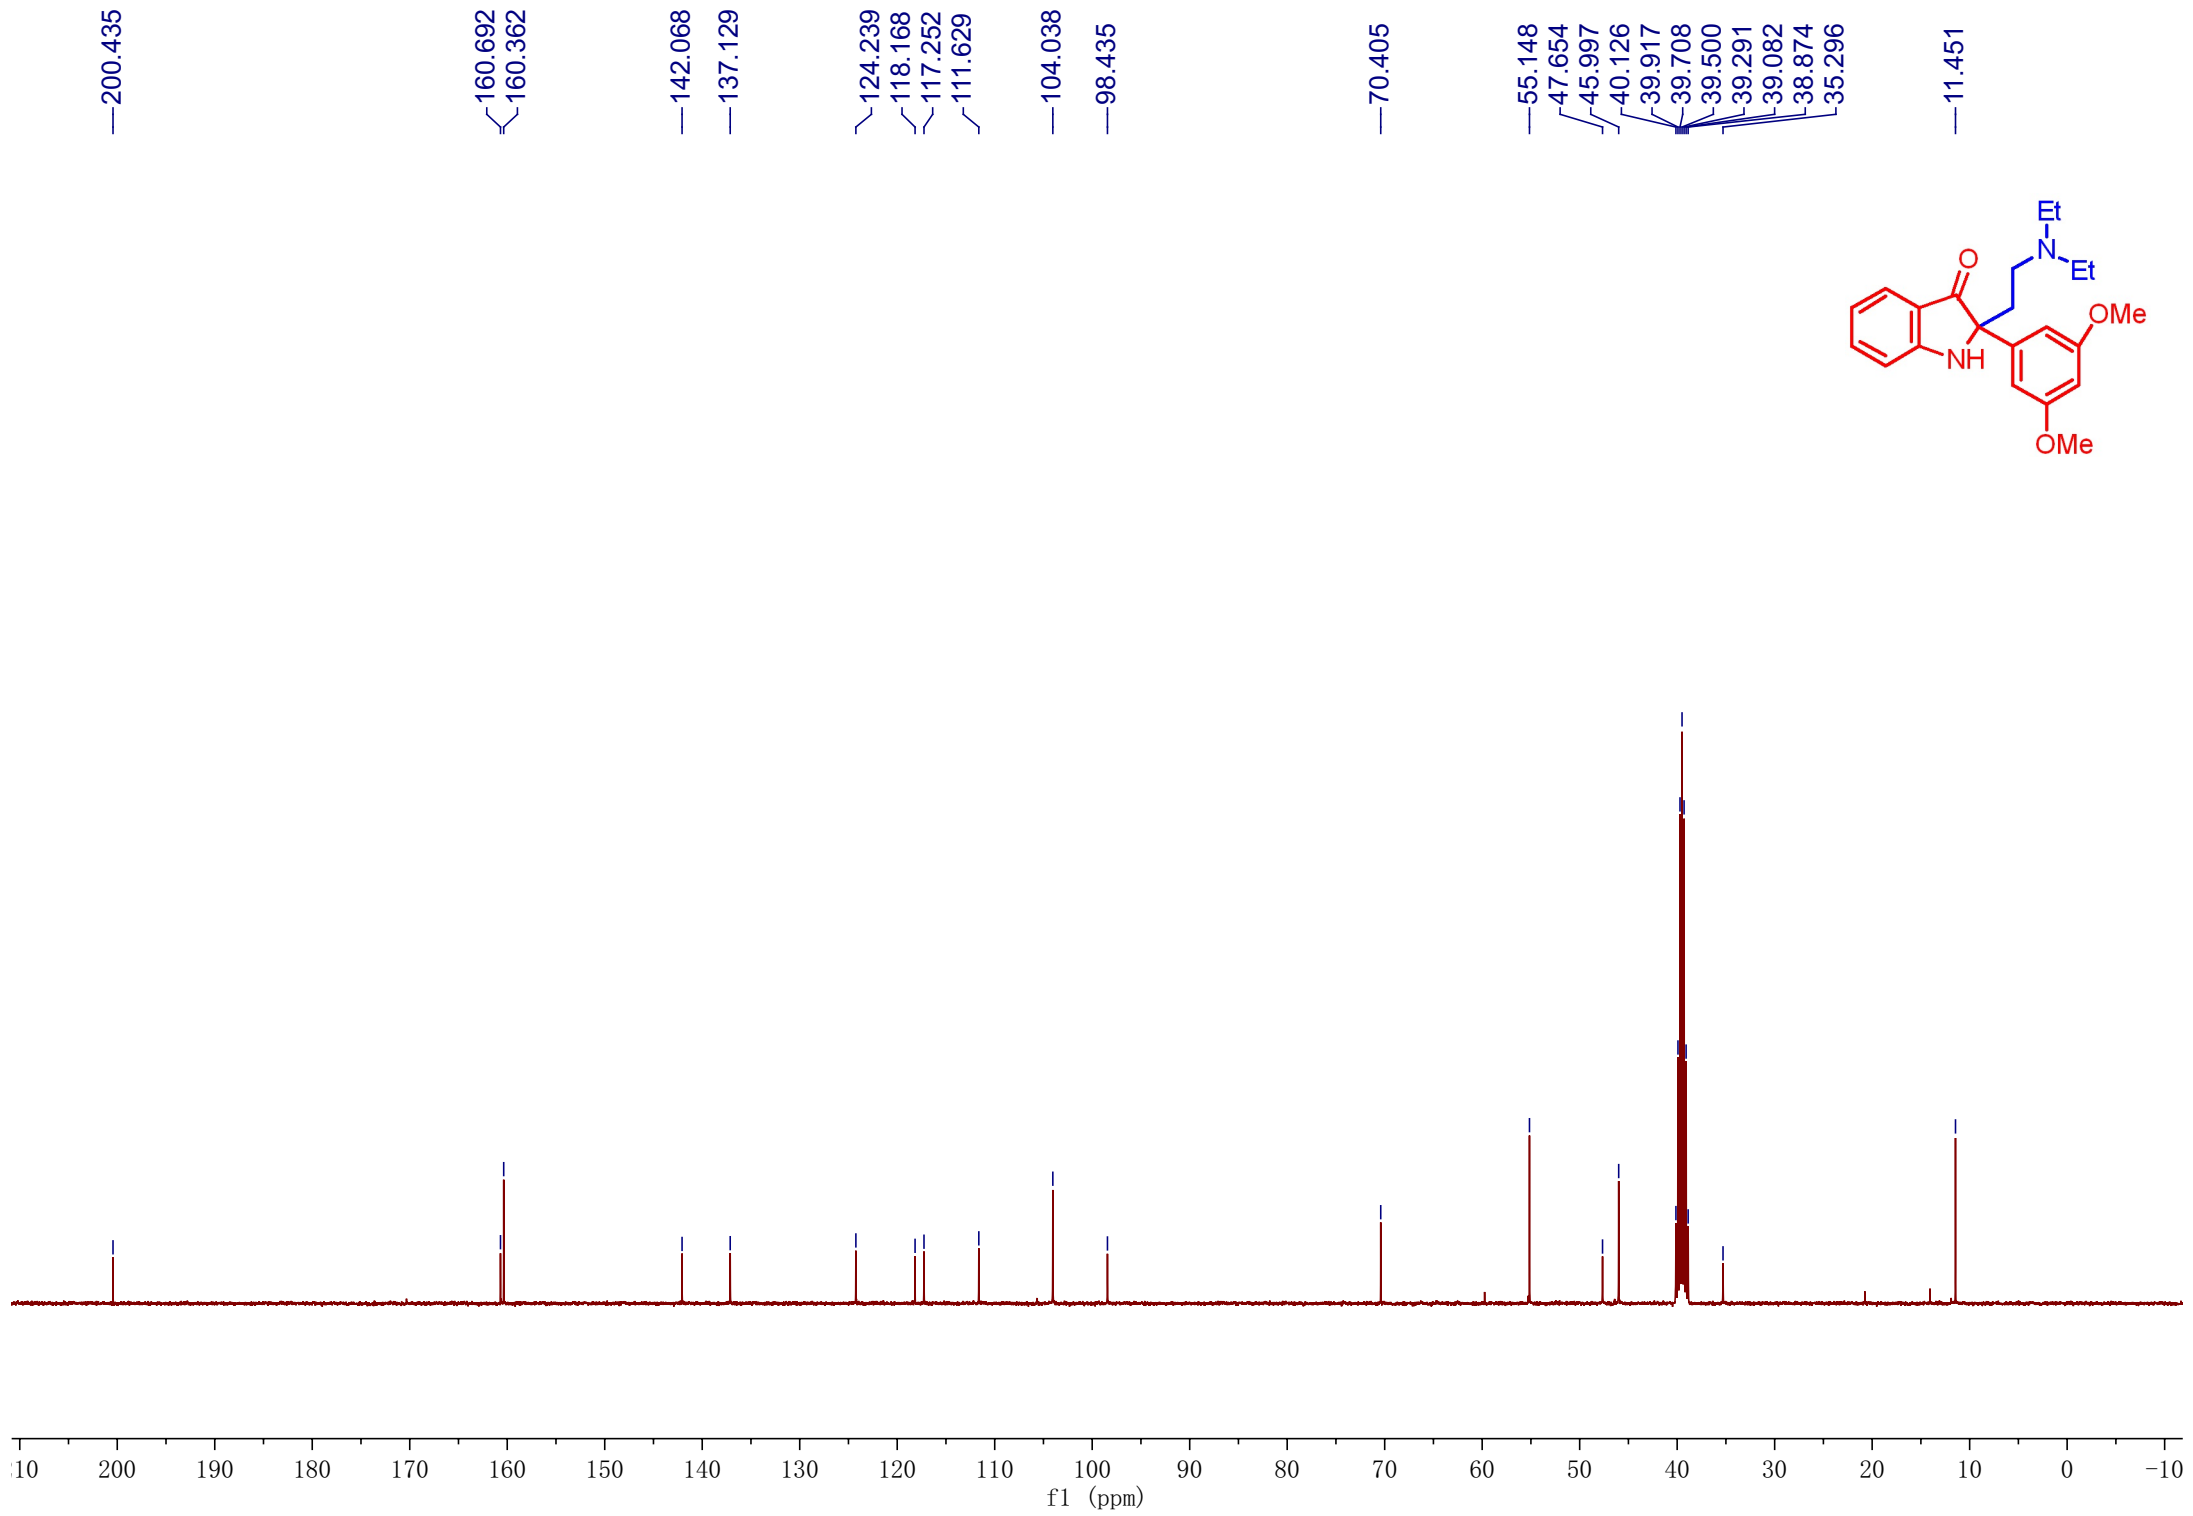



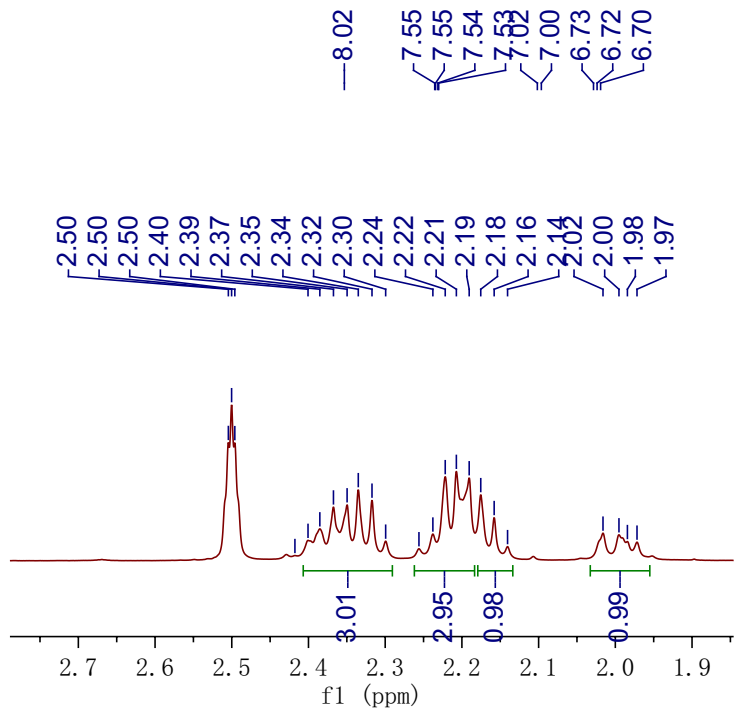

8.02  
7.55  
7.55  
7.54  
7.53  
7.00  
6.73  
6.72  
6.70

2.50  
2.50  
2.50  
2.42  
2.40  
2.39  
2.37  
2.35  
2.34  
2.32  
2.30  
2.26  
2.24  
2.22  
2.21  
2.19  
2.18  
2.16  
2.14  
2.02  
2.00  
1.98  
1.97  
0.77  
0.75  
0.73

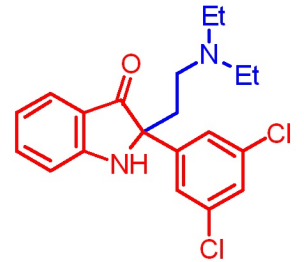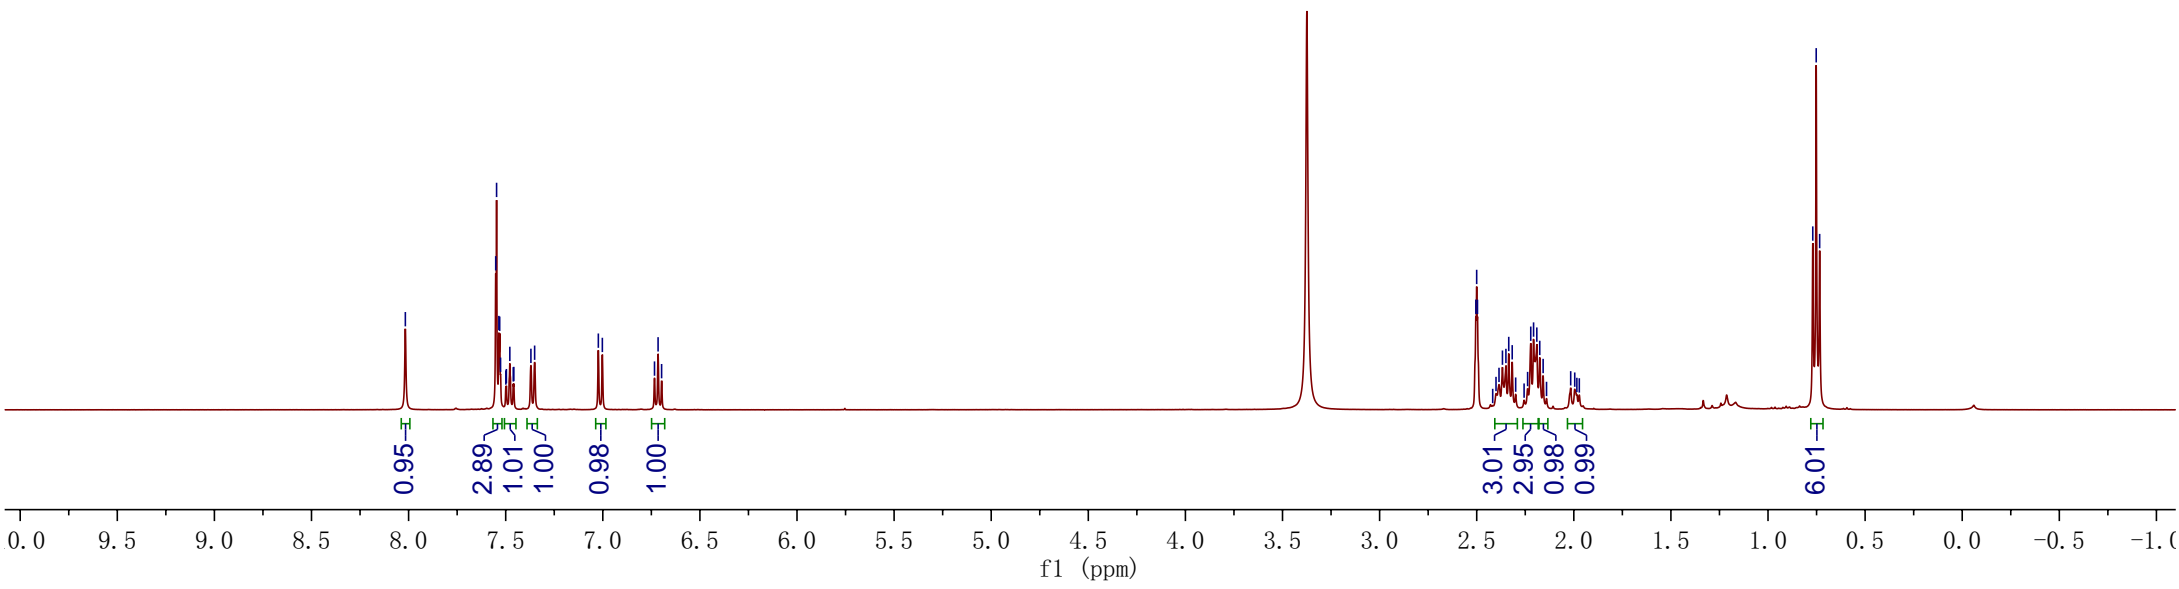

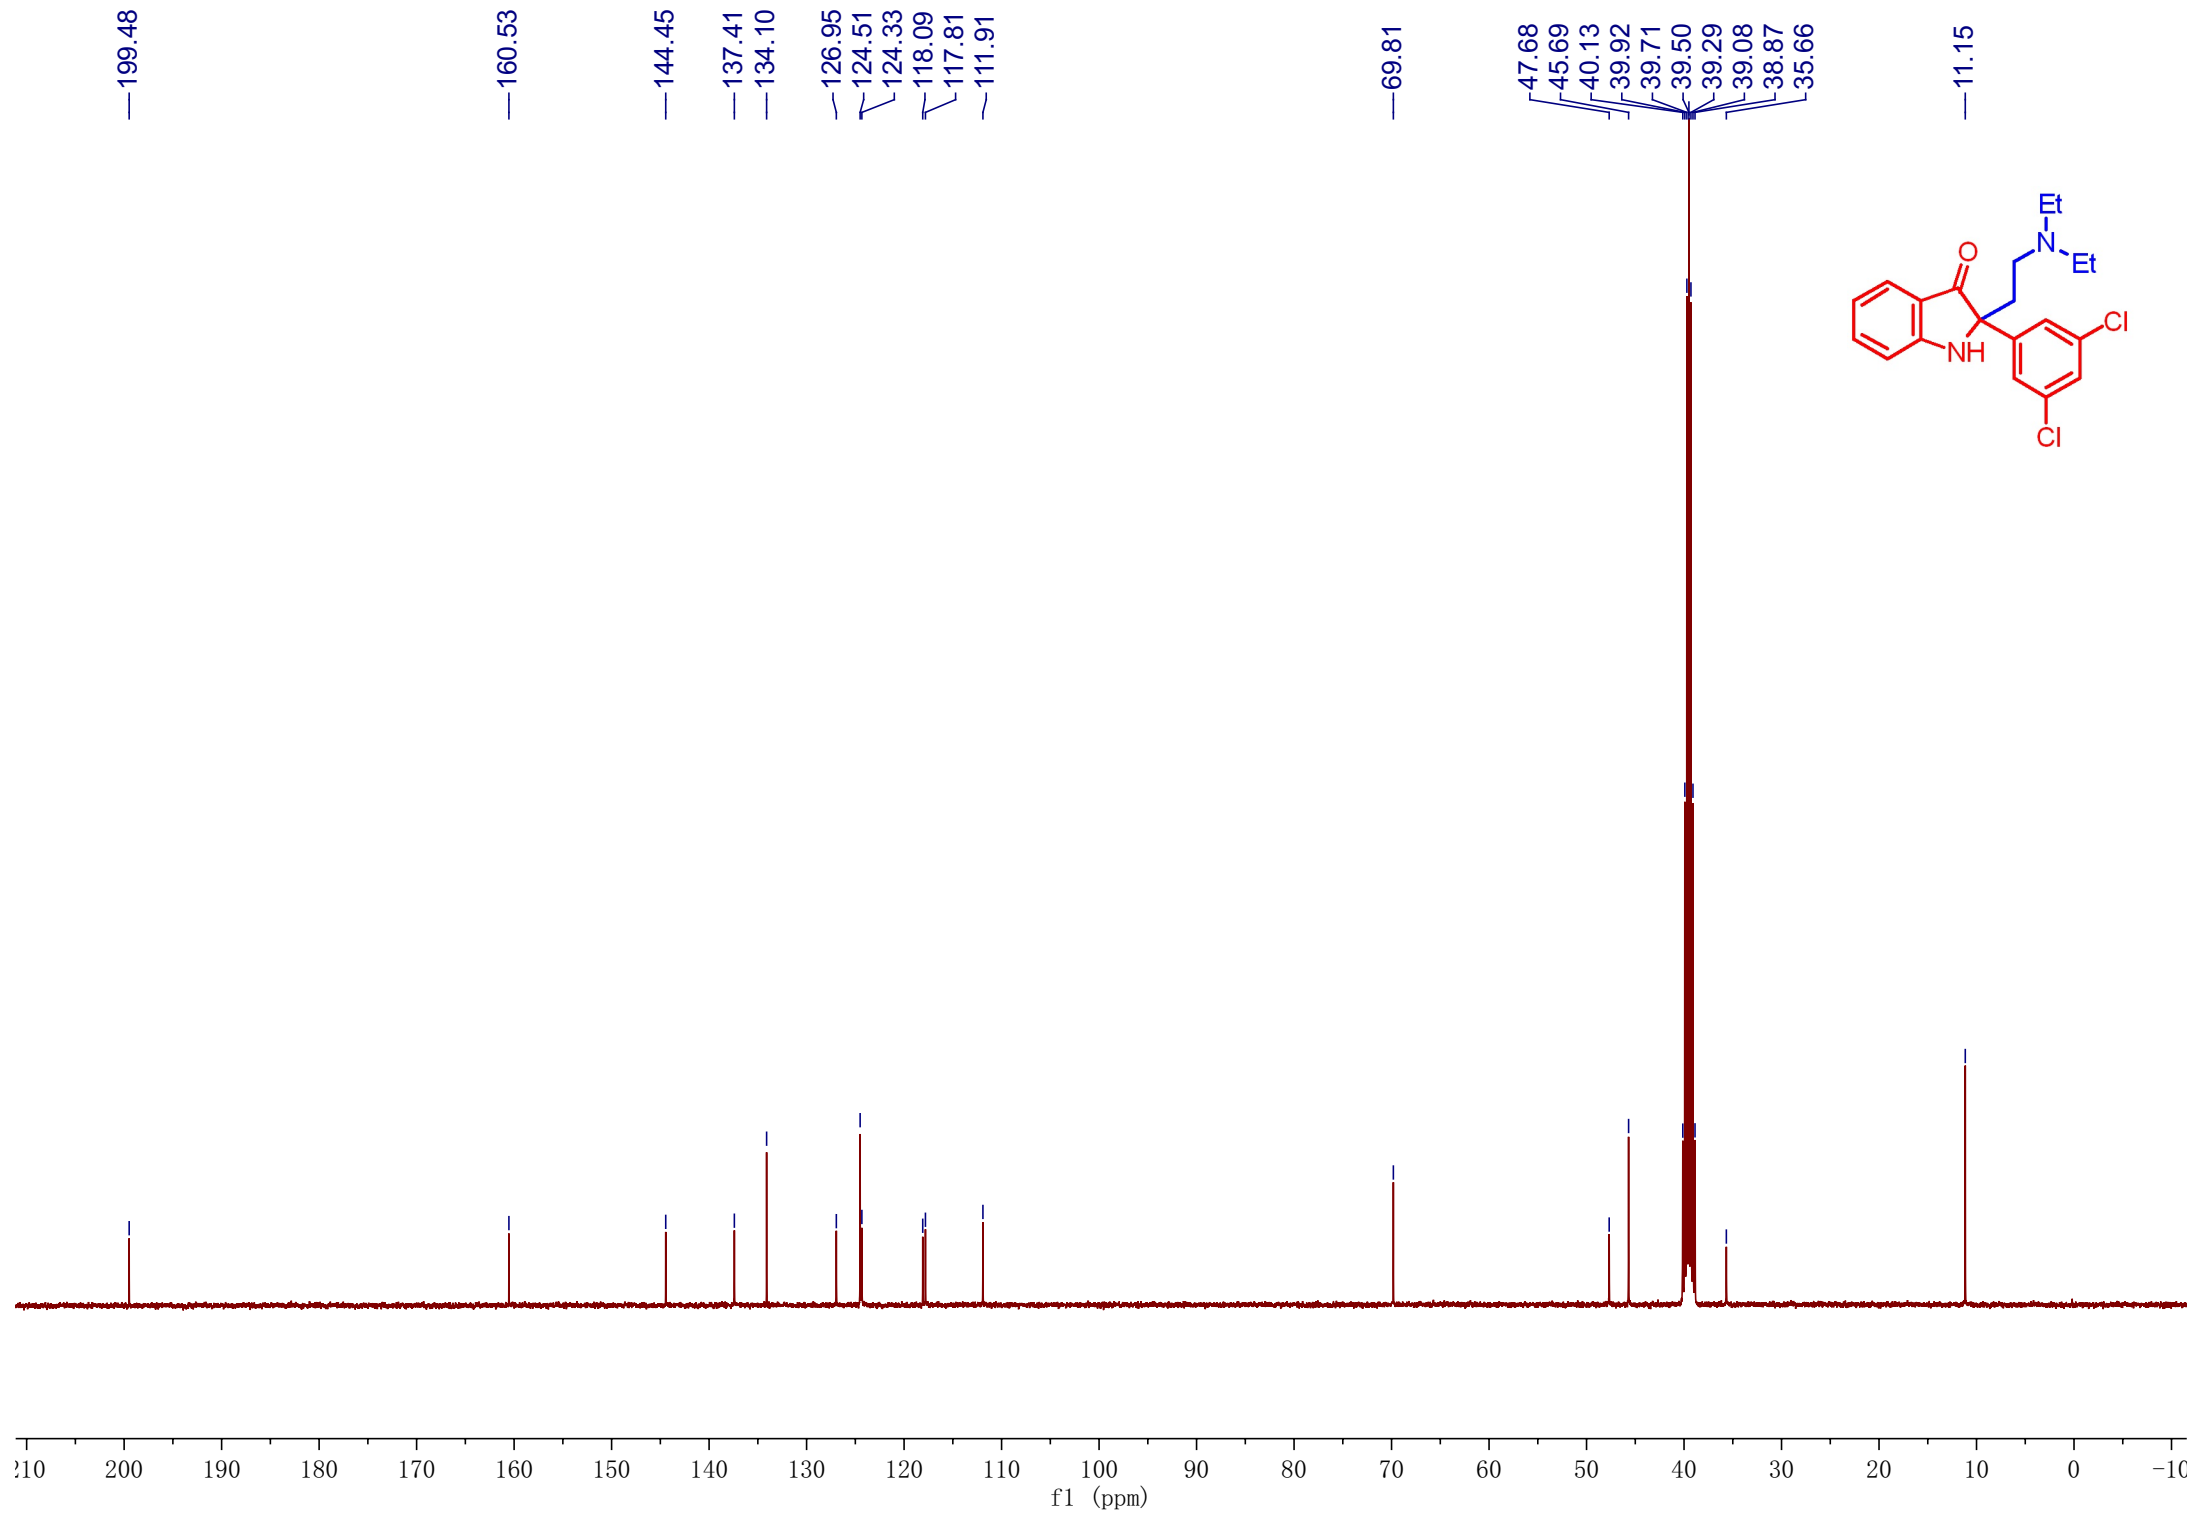

7.70 7.69 7.67 7.55 7.53 7.47 7.46 7.45 7.44 7.43 7.43 7.34 7.32 7.30 7.26 7.24 7.24 7.23 7.22 6.93 6.91 6.78 6.76 6.75 2.60 2.58 2.56 2.55 2.54 2.53 2.50 2.49 2.47 2.46 2.45 2.44 2.33 2.32 2.31 2.28 2.28 2.27 2.26 2.23 2.22 2.20 2.19 2.17 2.11 2.10 2.08 1.99 1.98 1.96 1.95 1.95 1.29 1.28 1.27 1.27 1.26 1.24 0.92 0.90 0.89 0.88 0.86 0.84

2.60 2.58 2.56 2.55 2.54 2.53 2.50 2.49 2.44 2.32 2.31 2.28 2.28 2.27 2.26 2.23 2.22 2.20 2.19 2.11 2.10 1.98 1.95

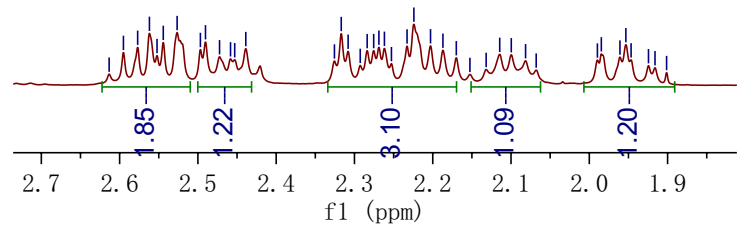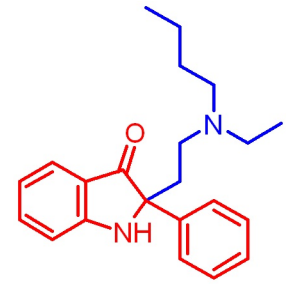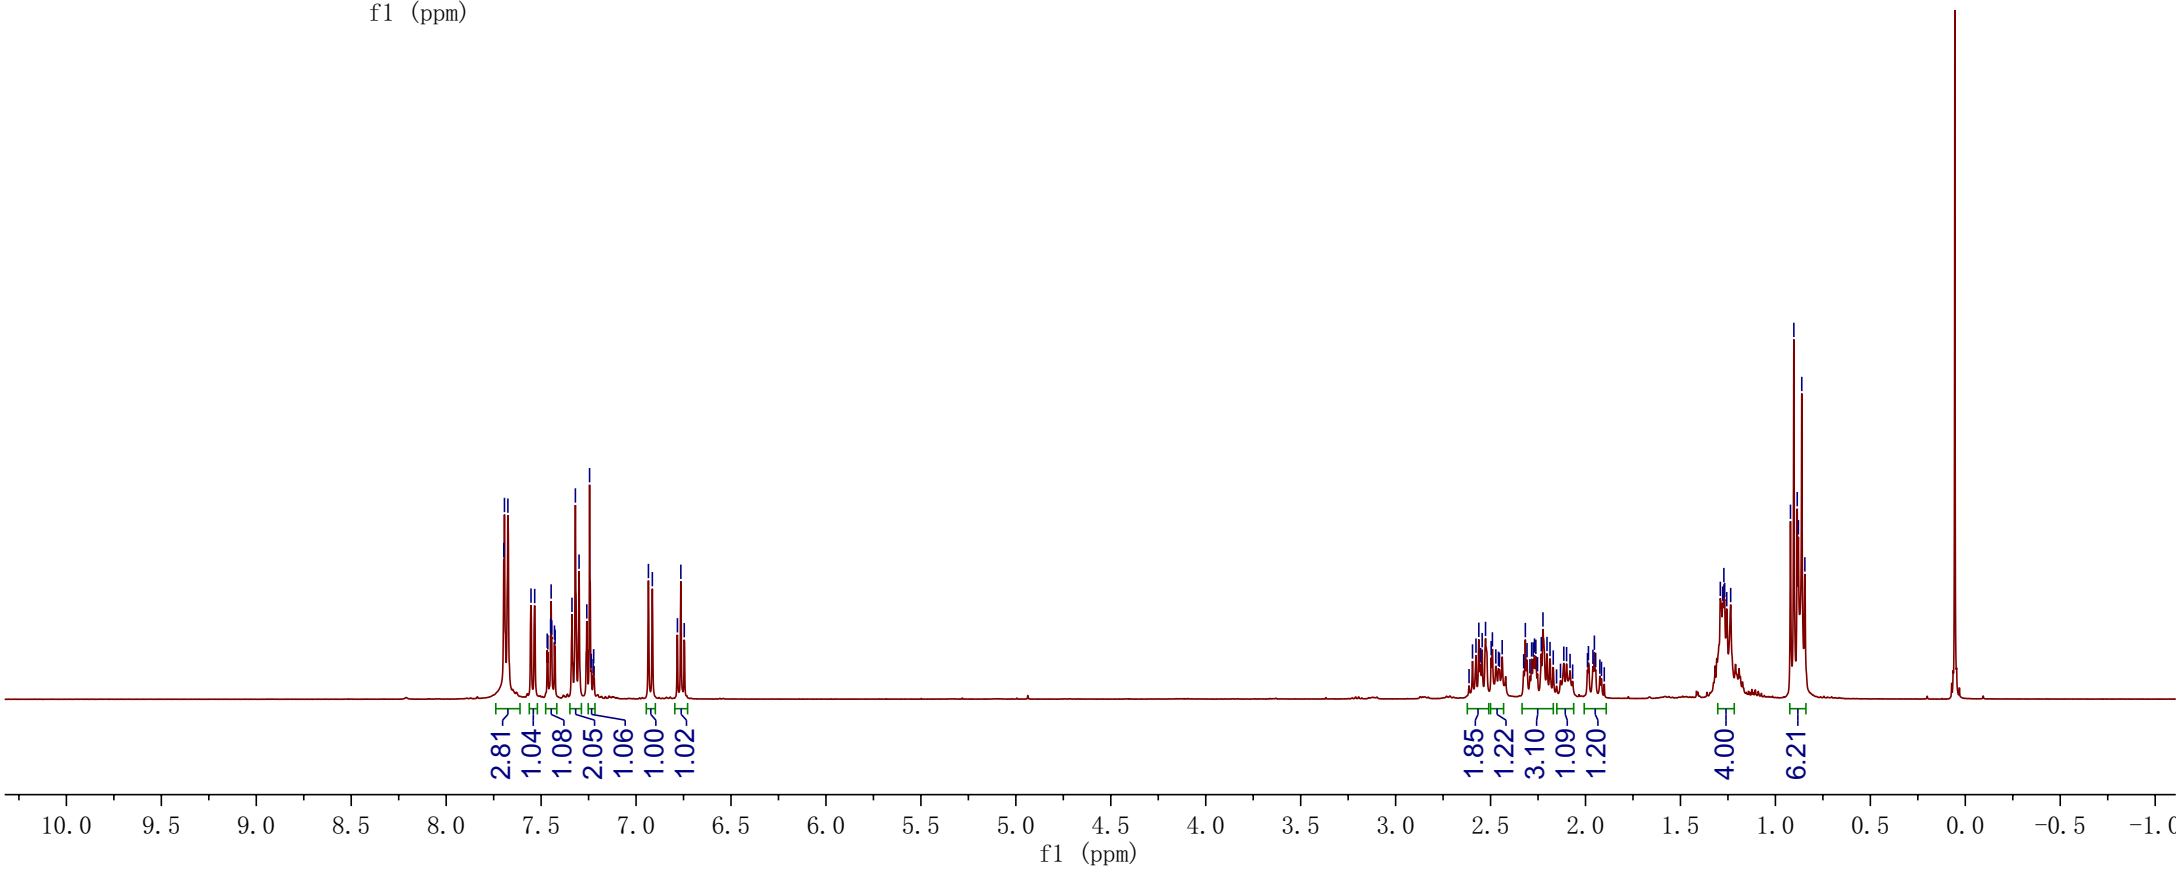

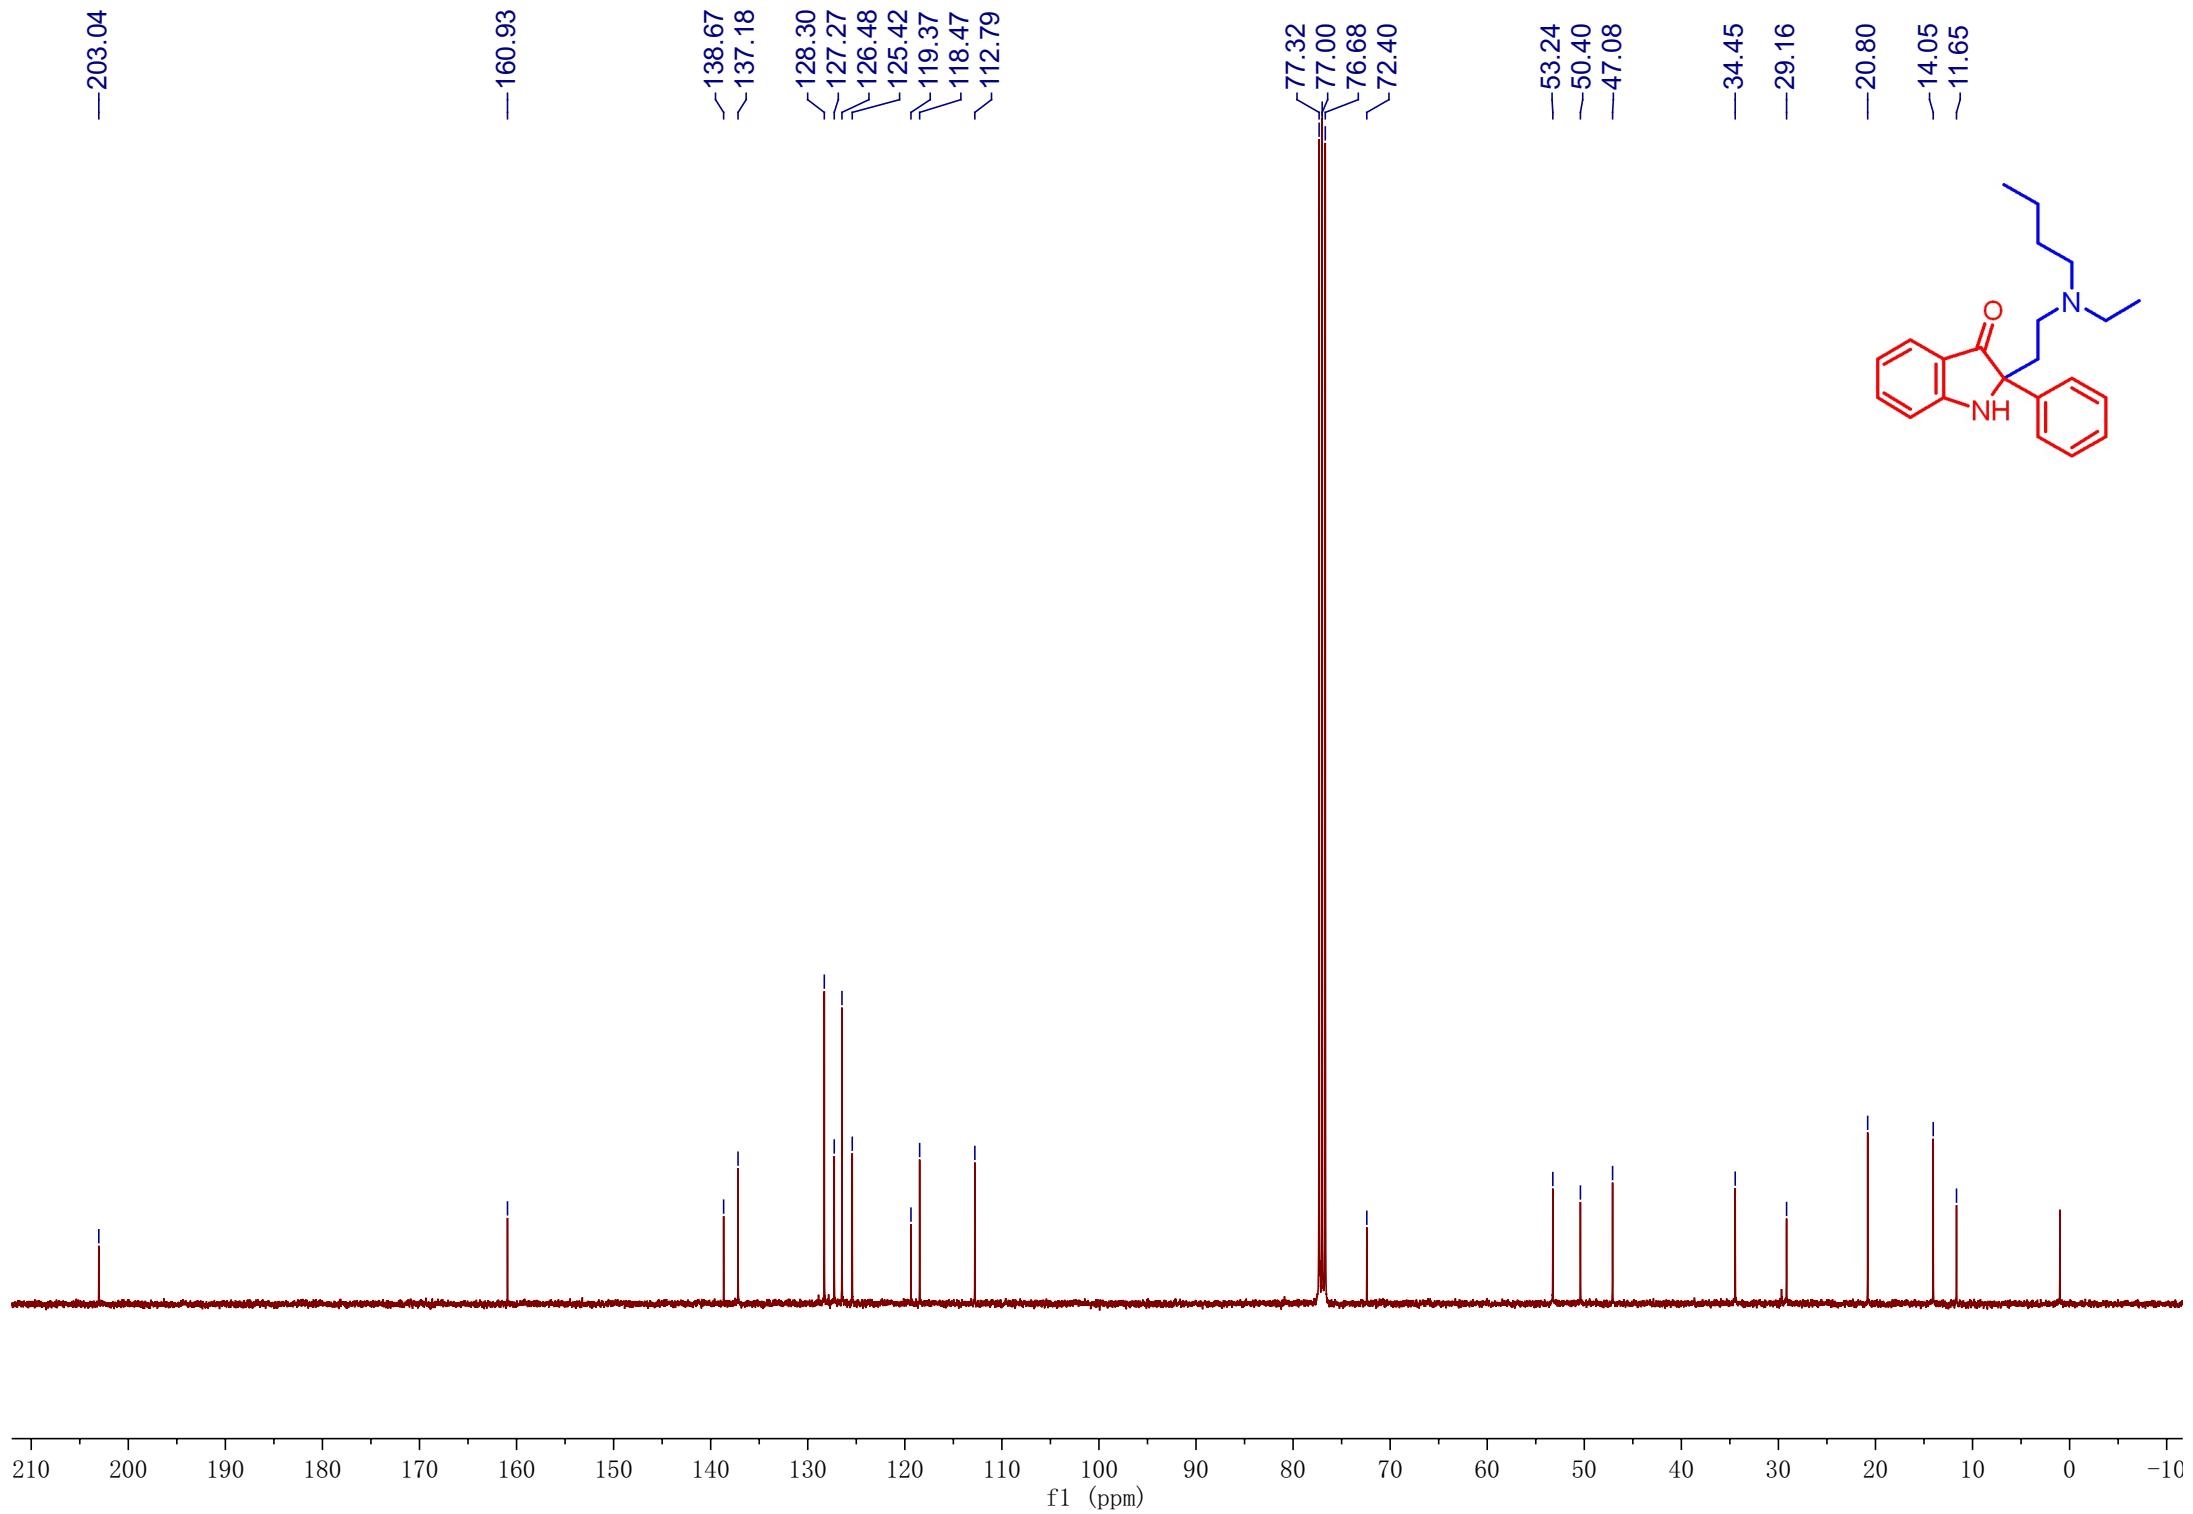

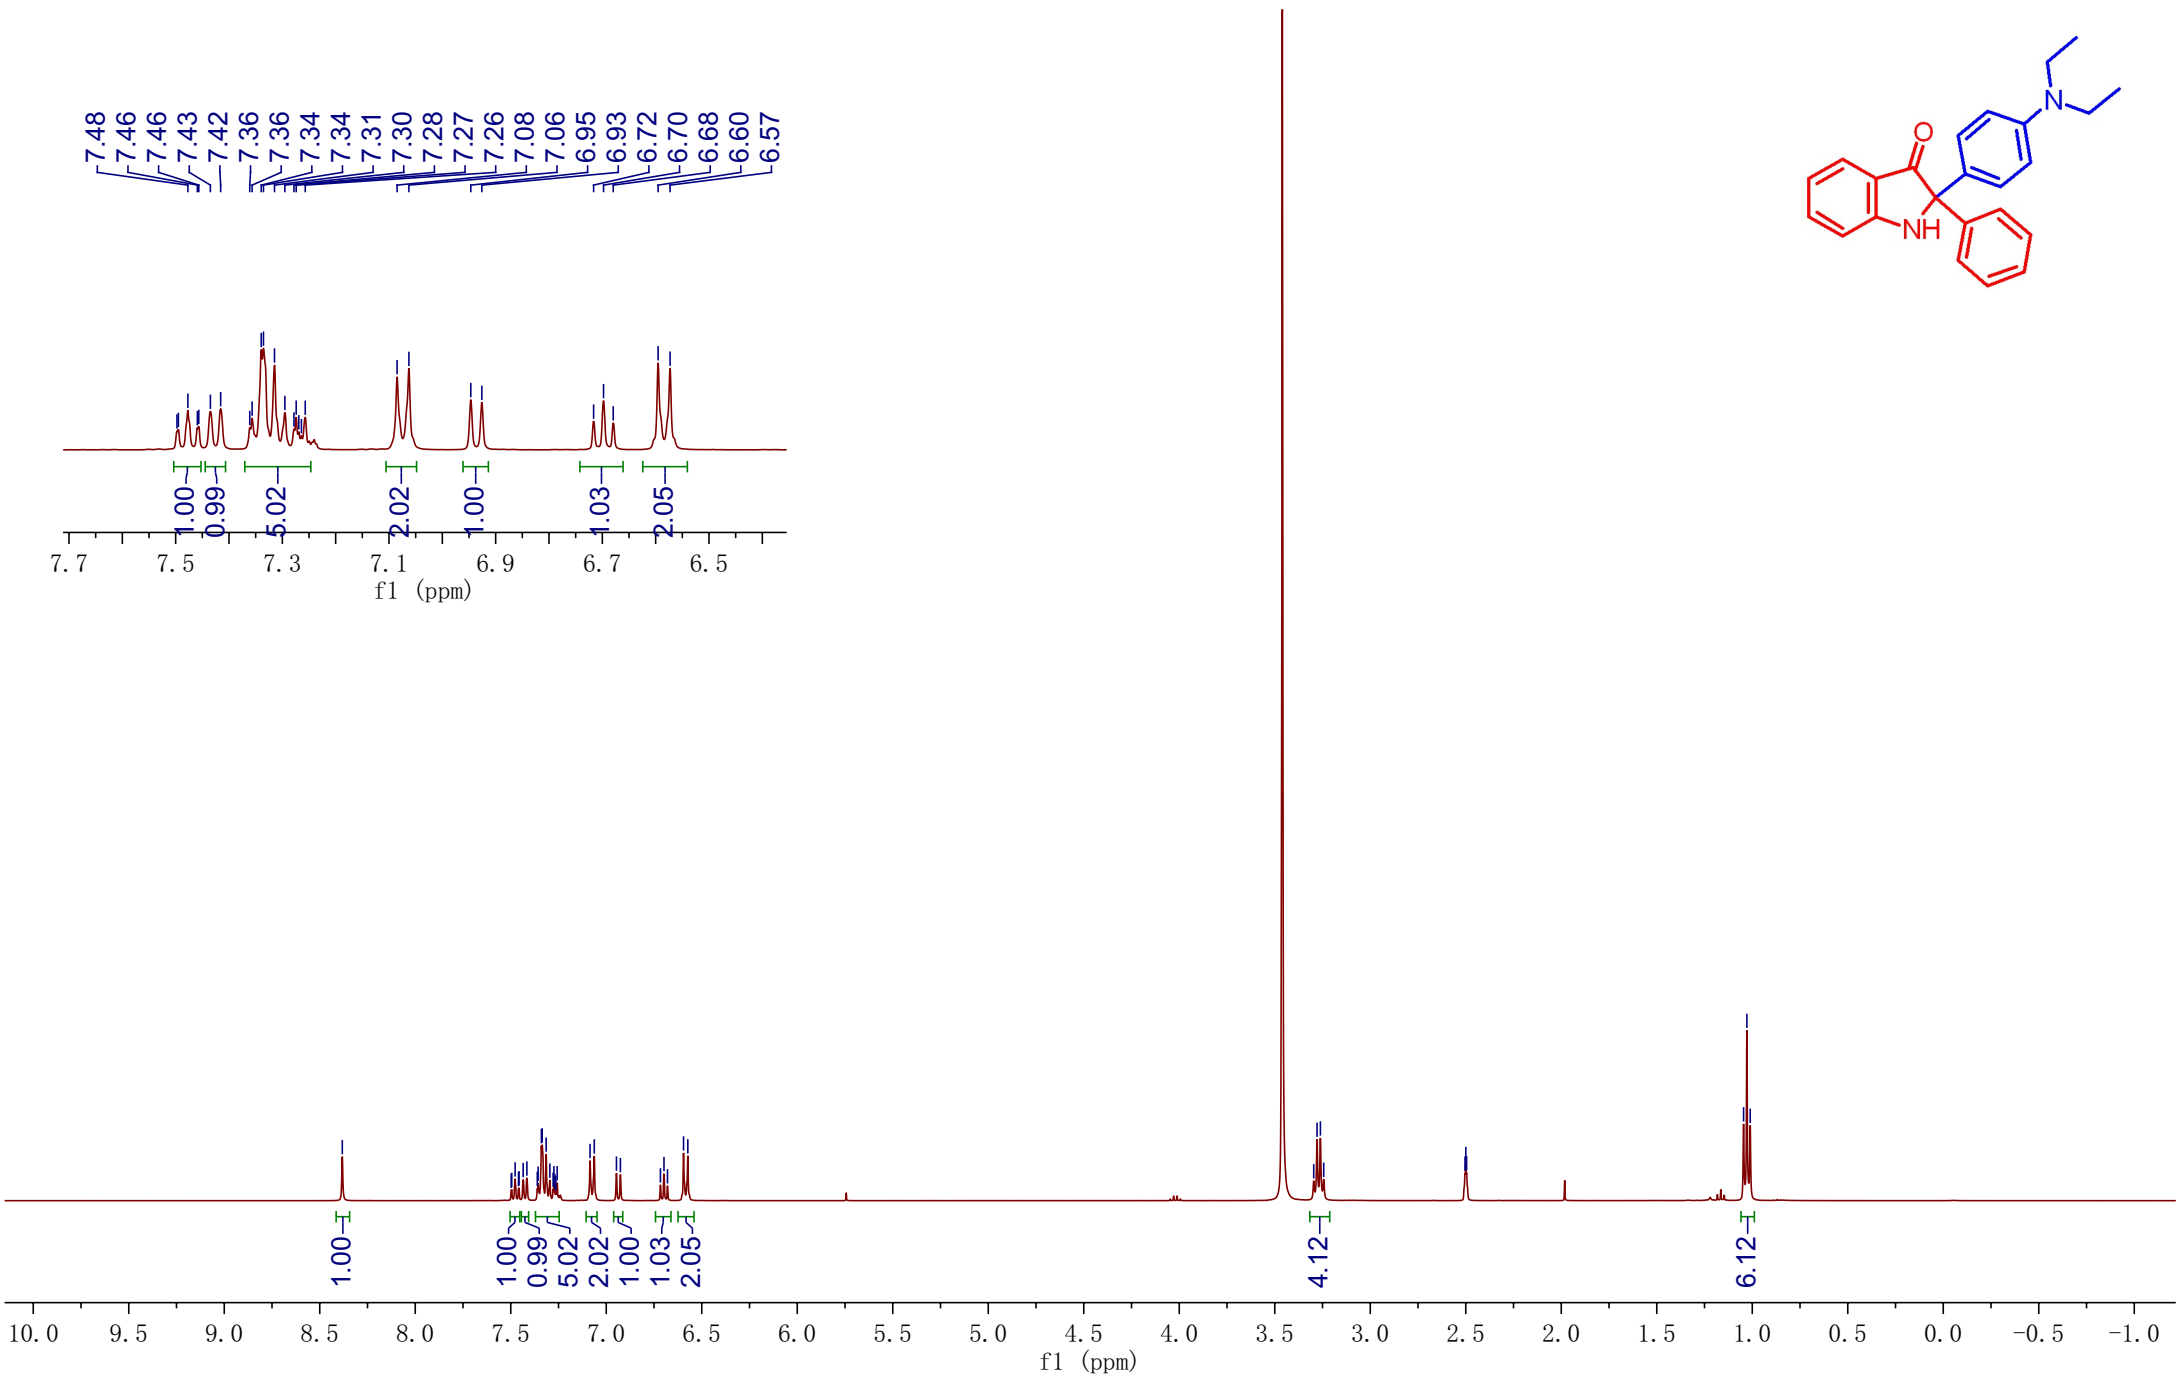

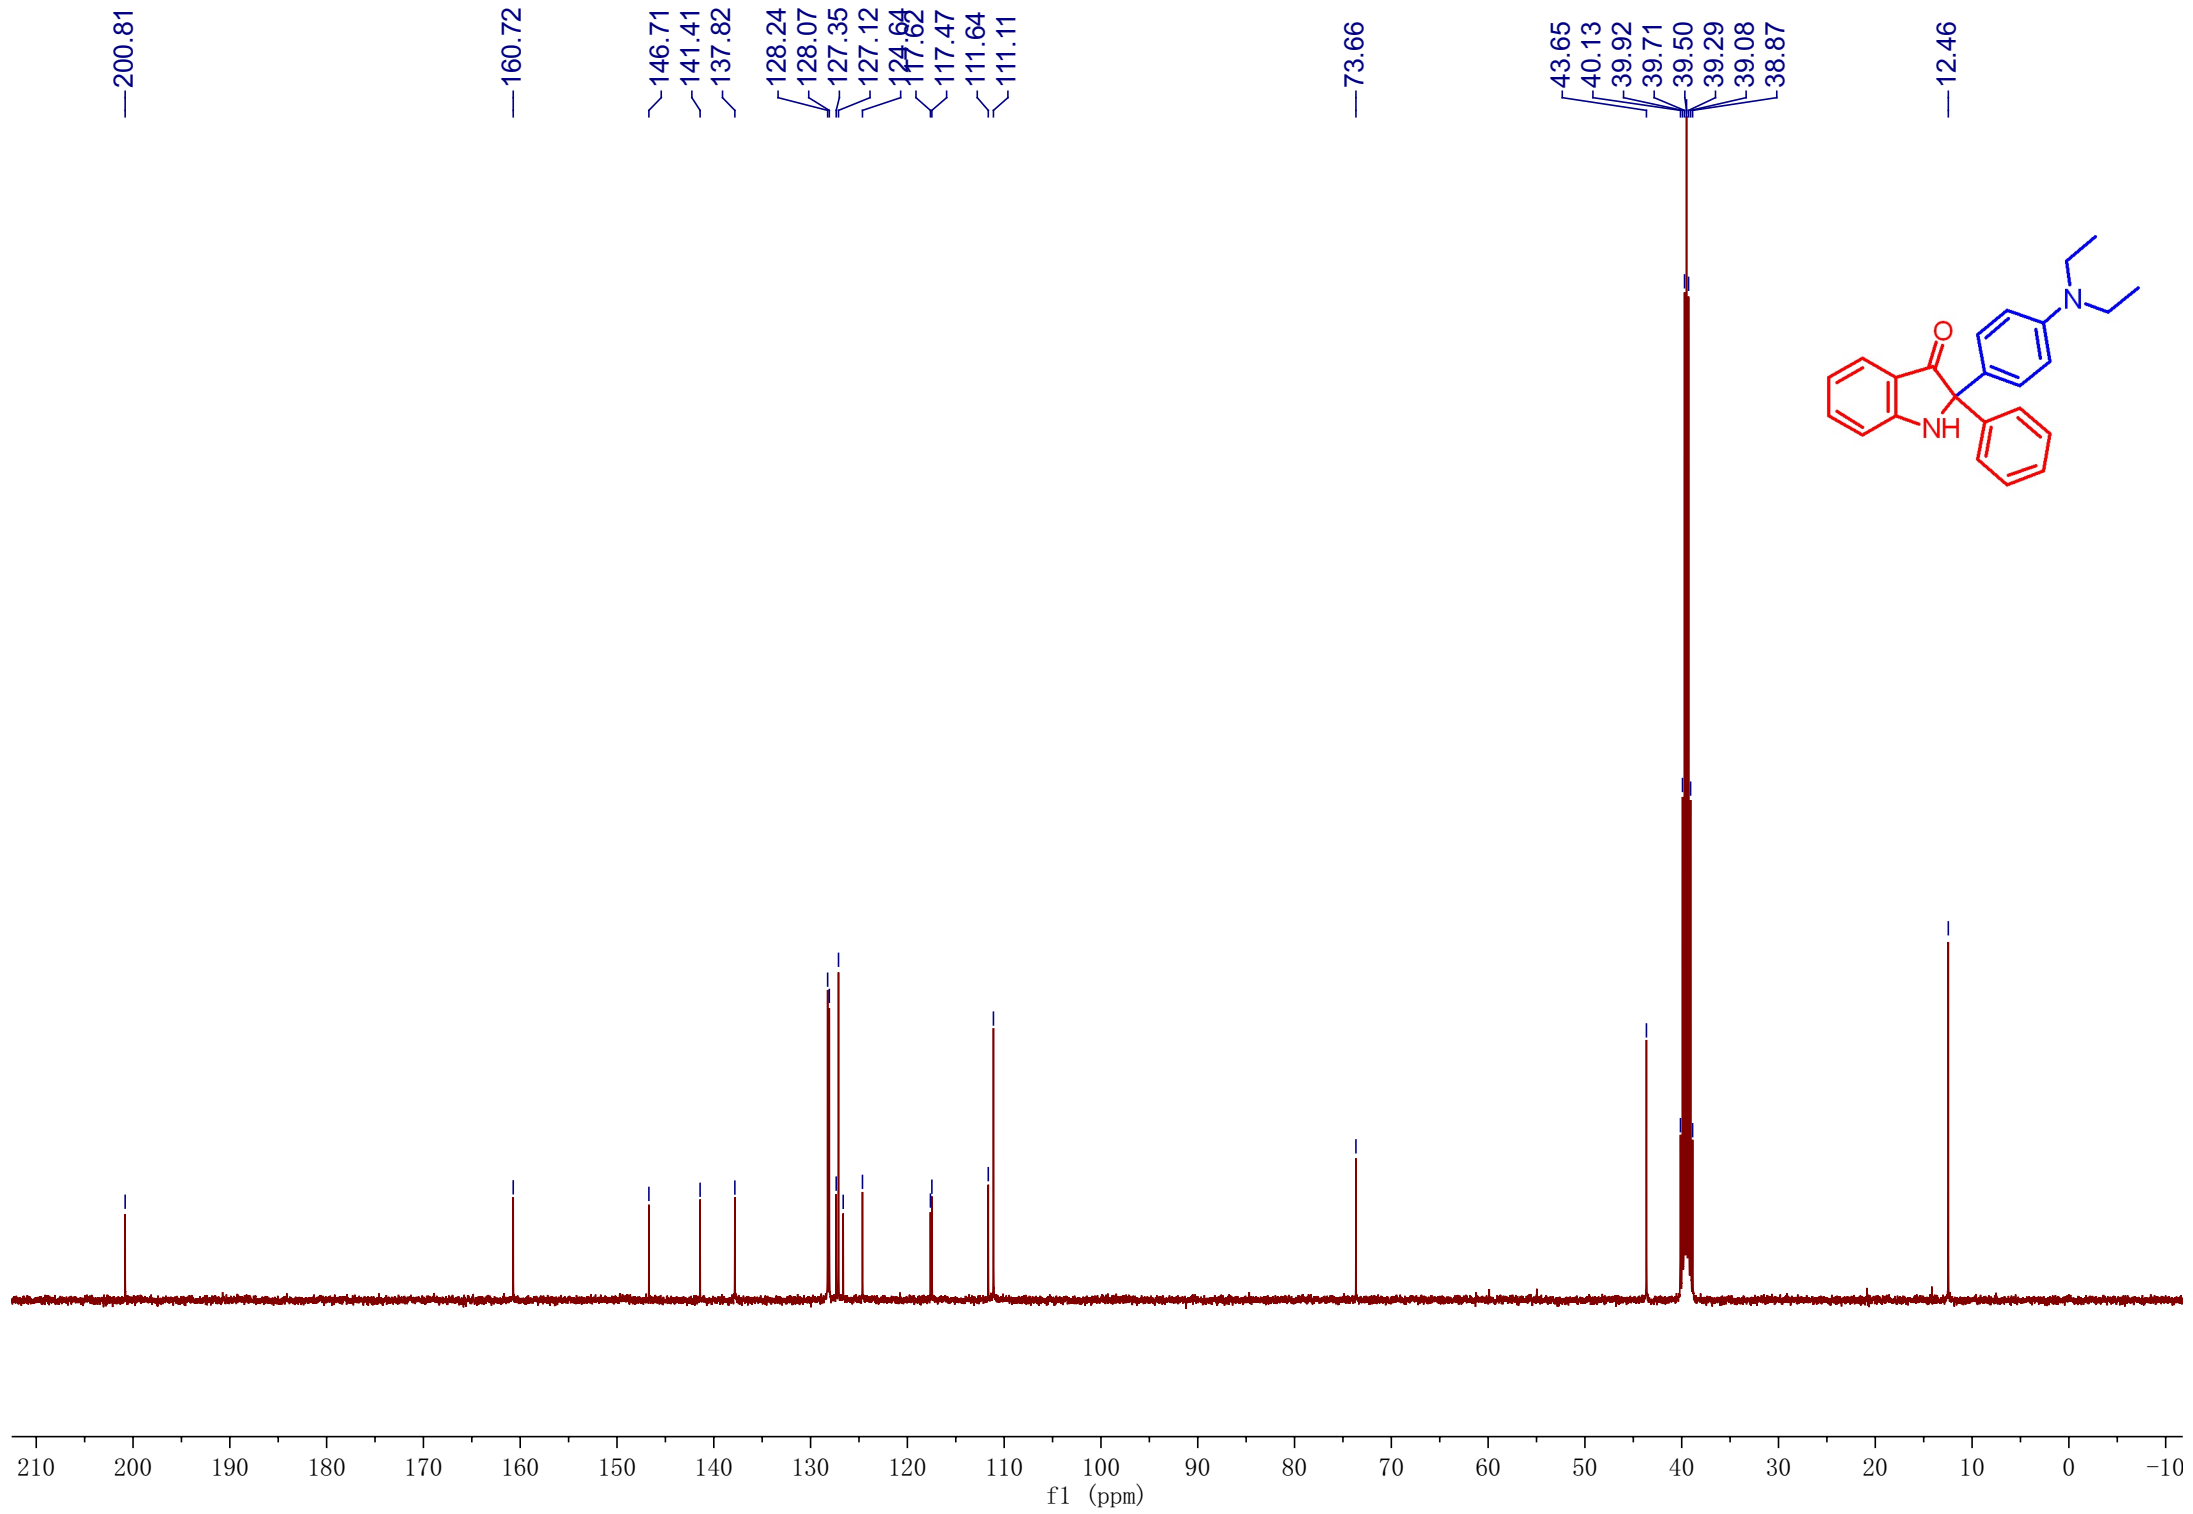

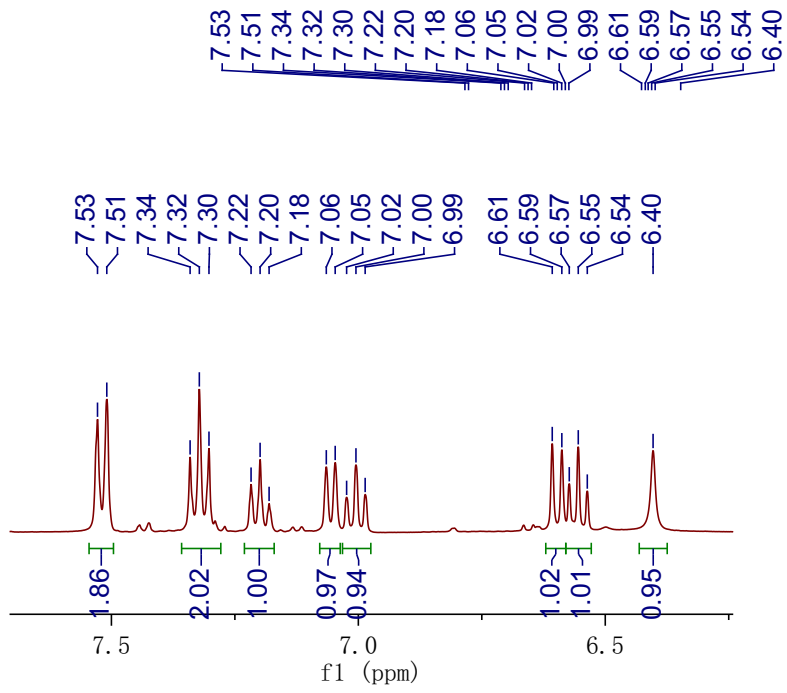

—4.85

—3.35

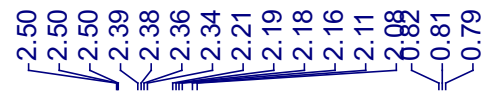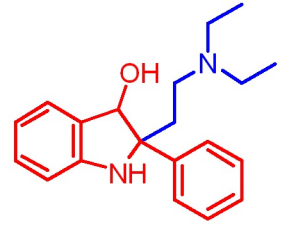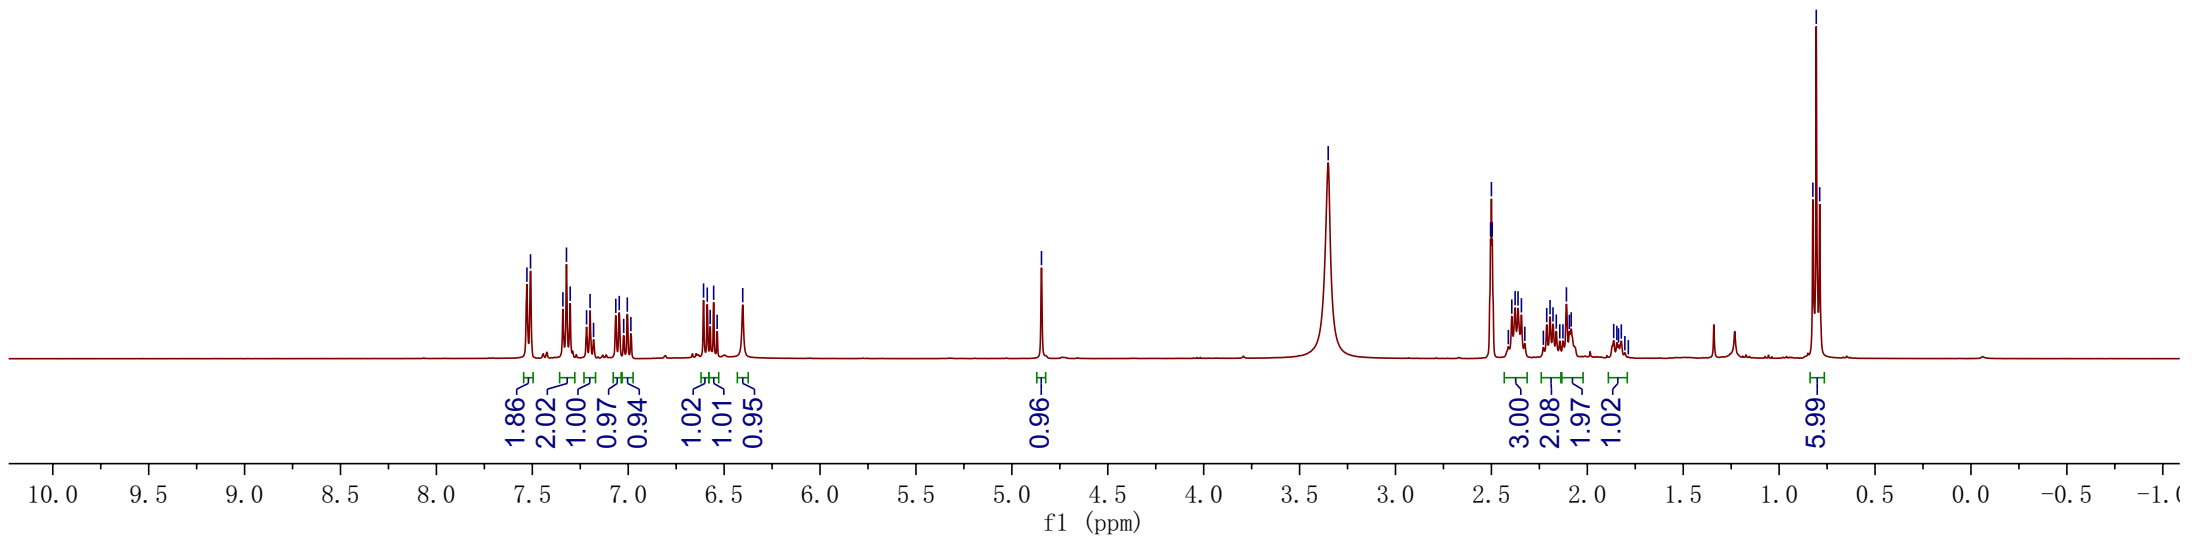

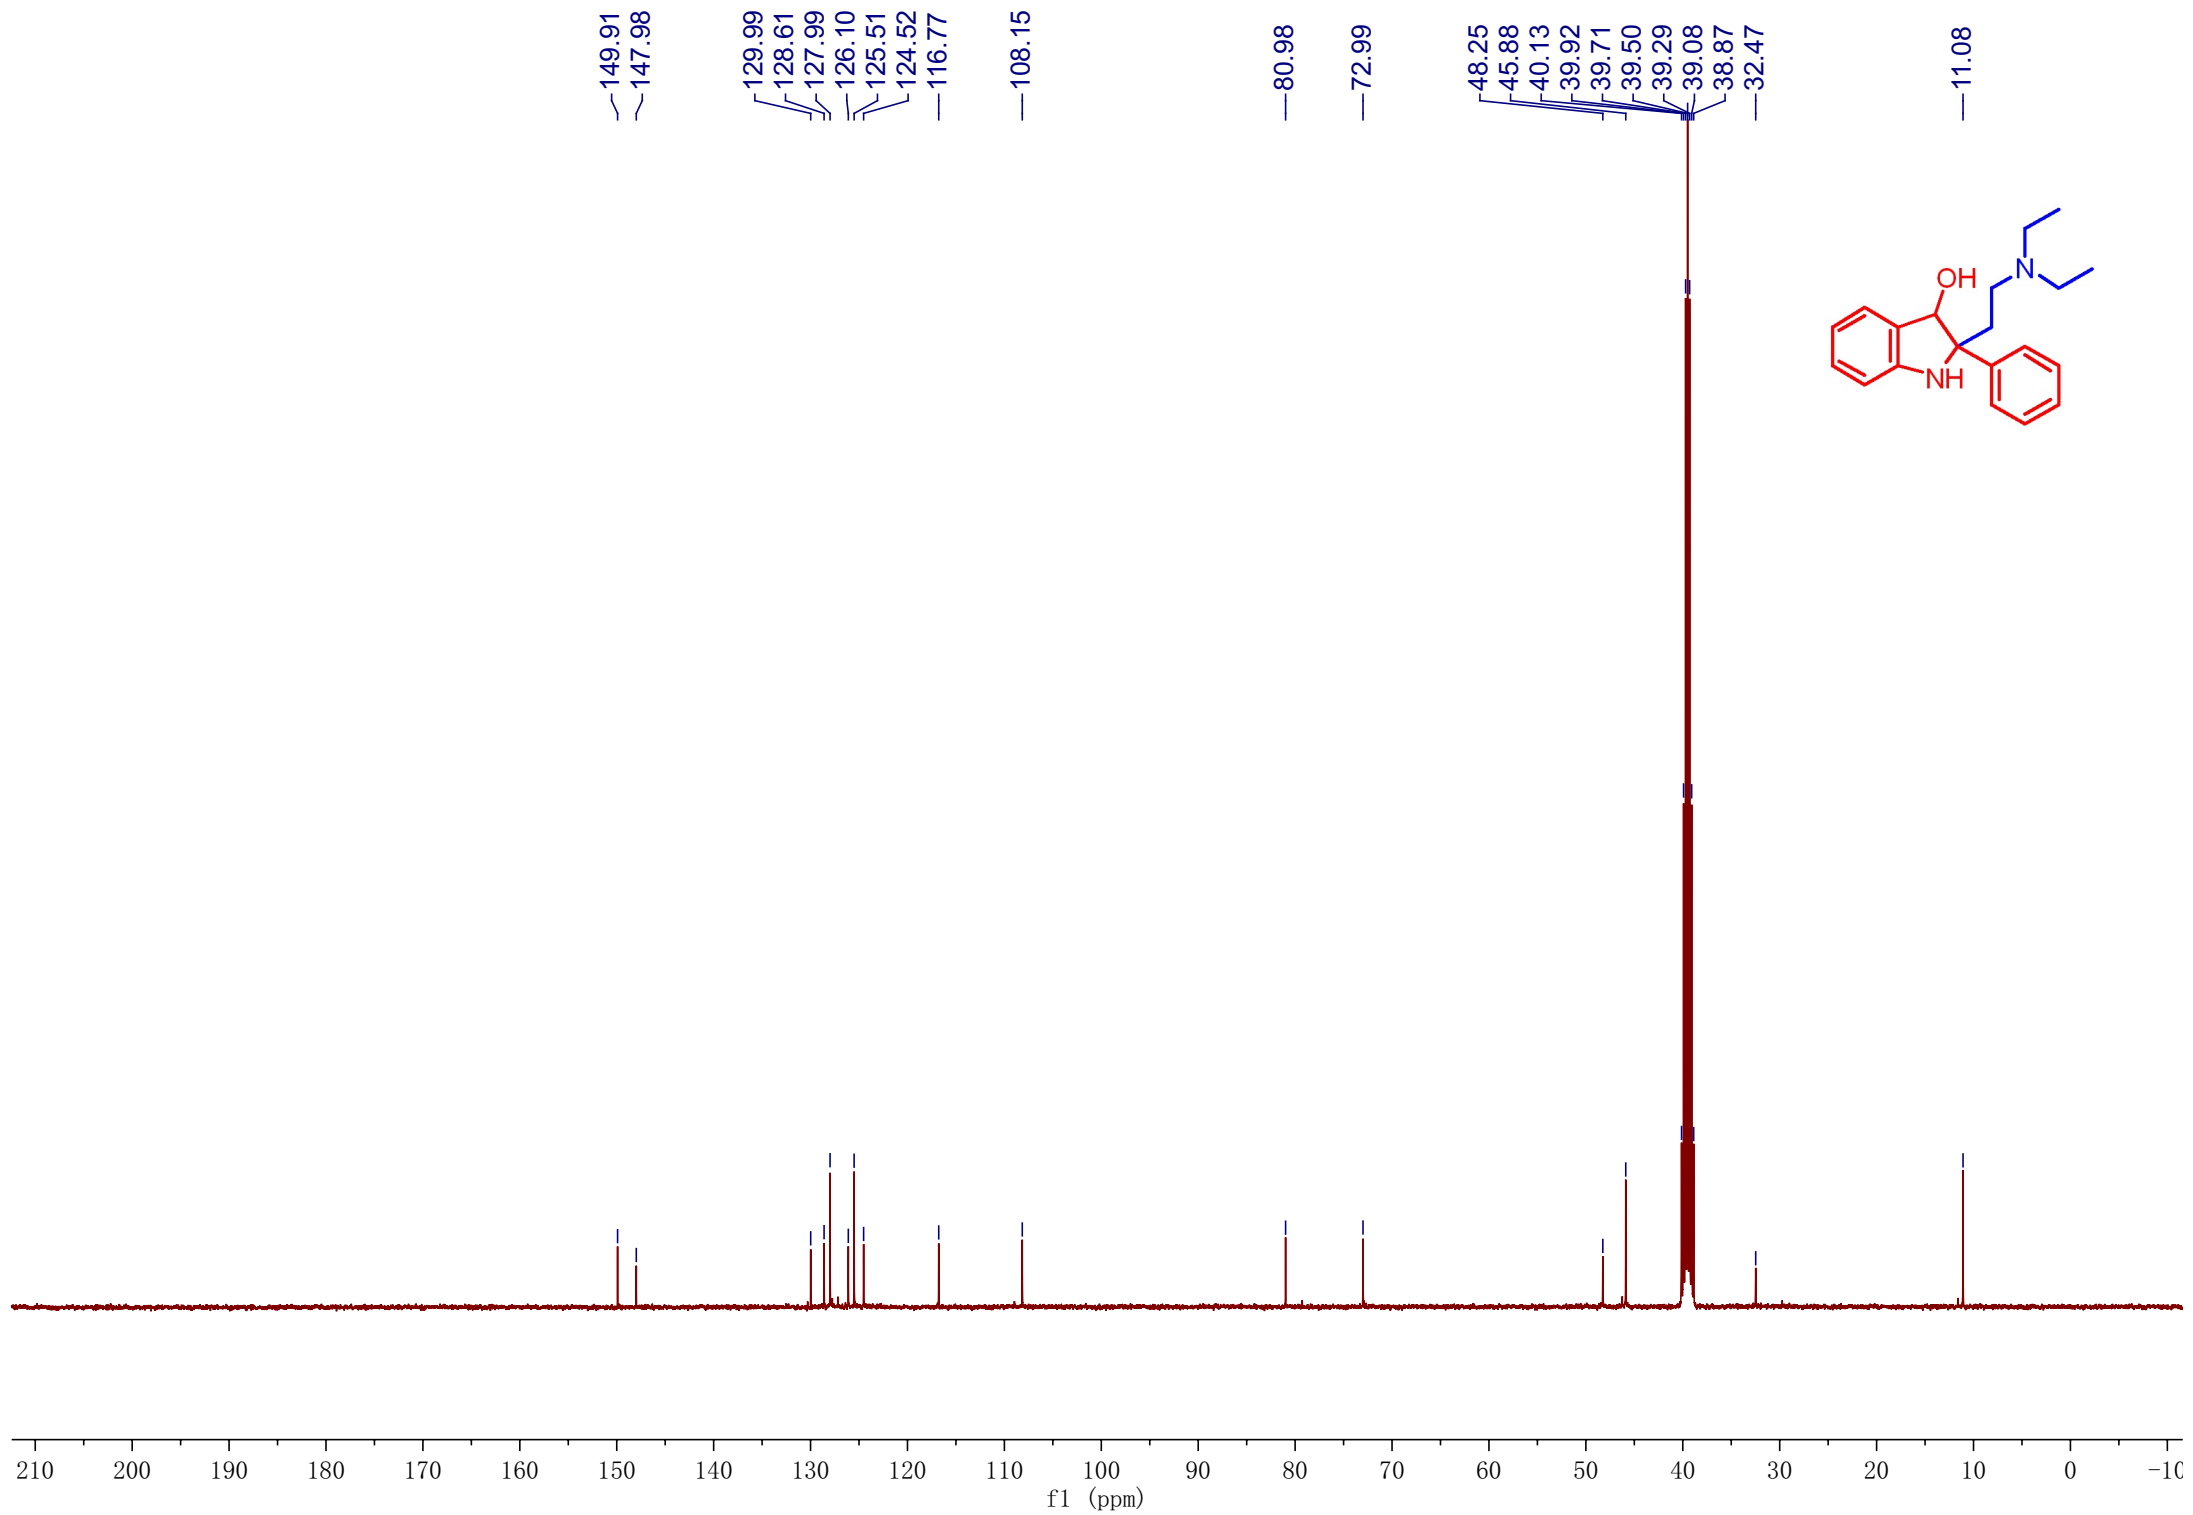



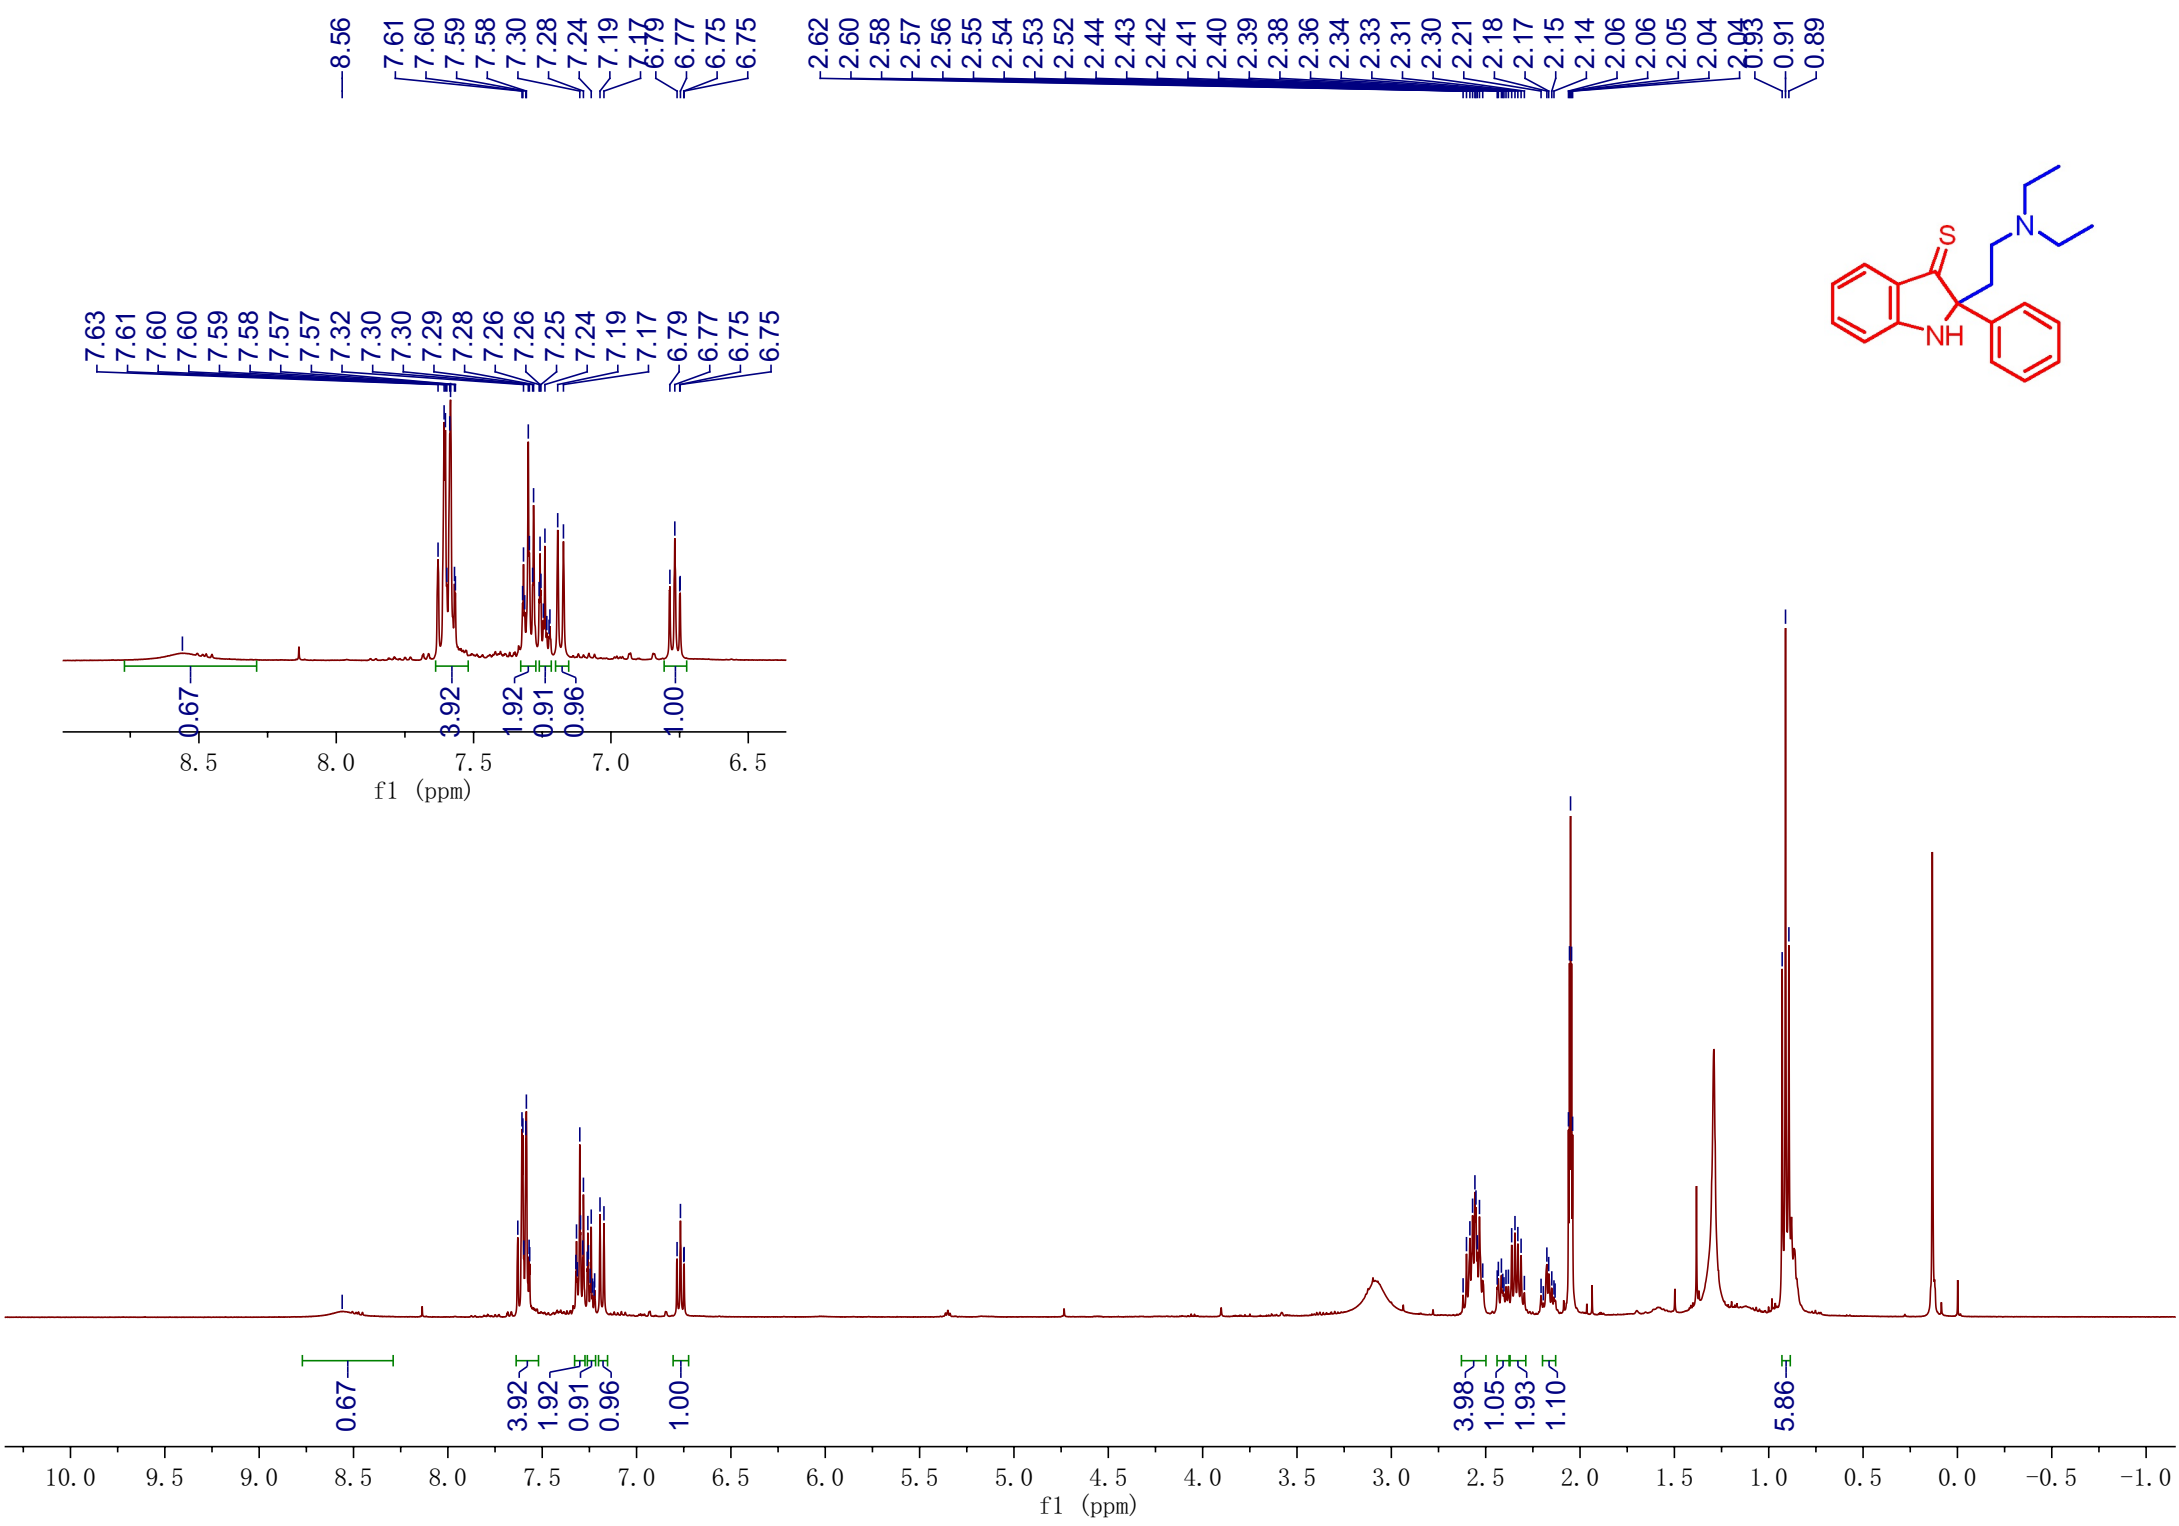

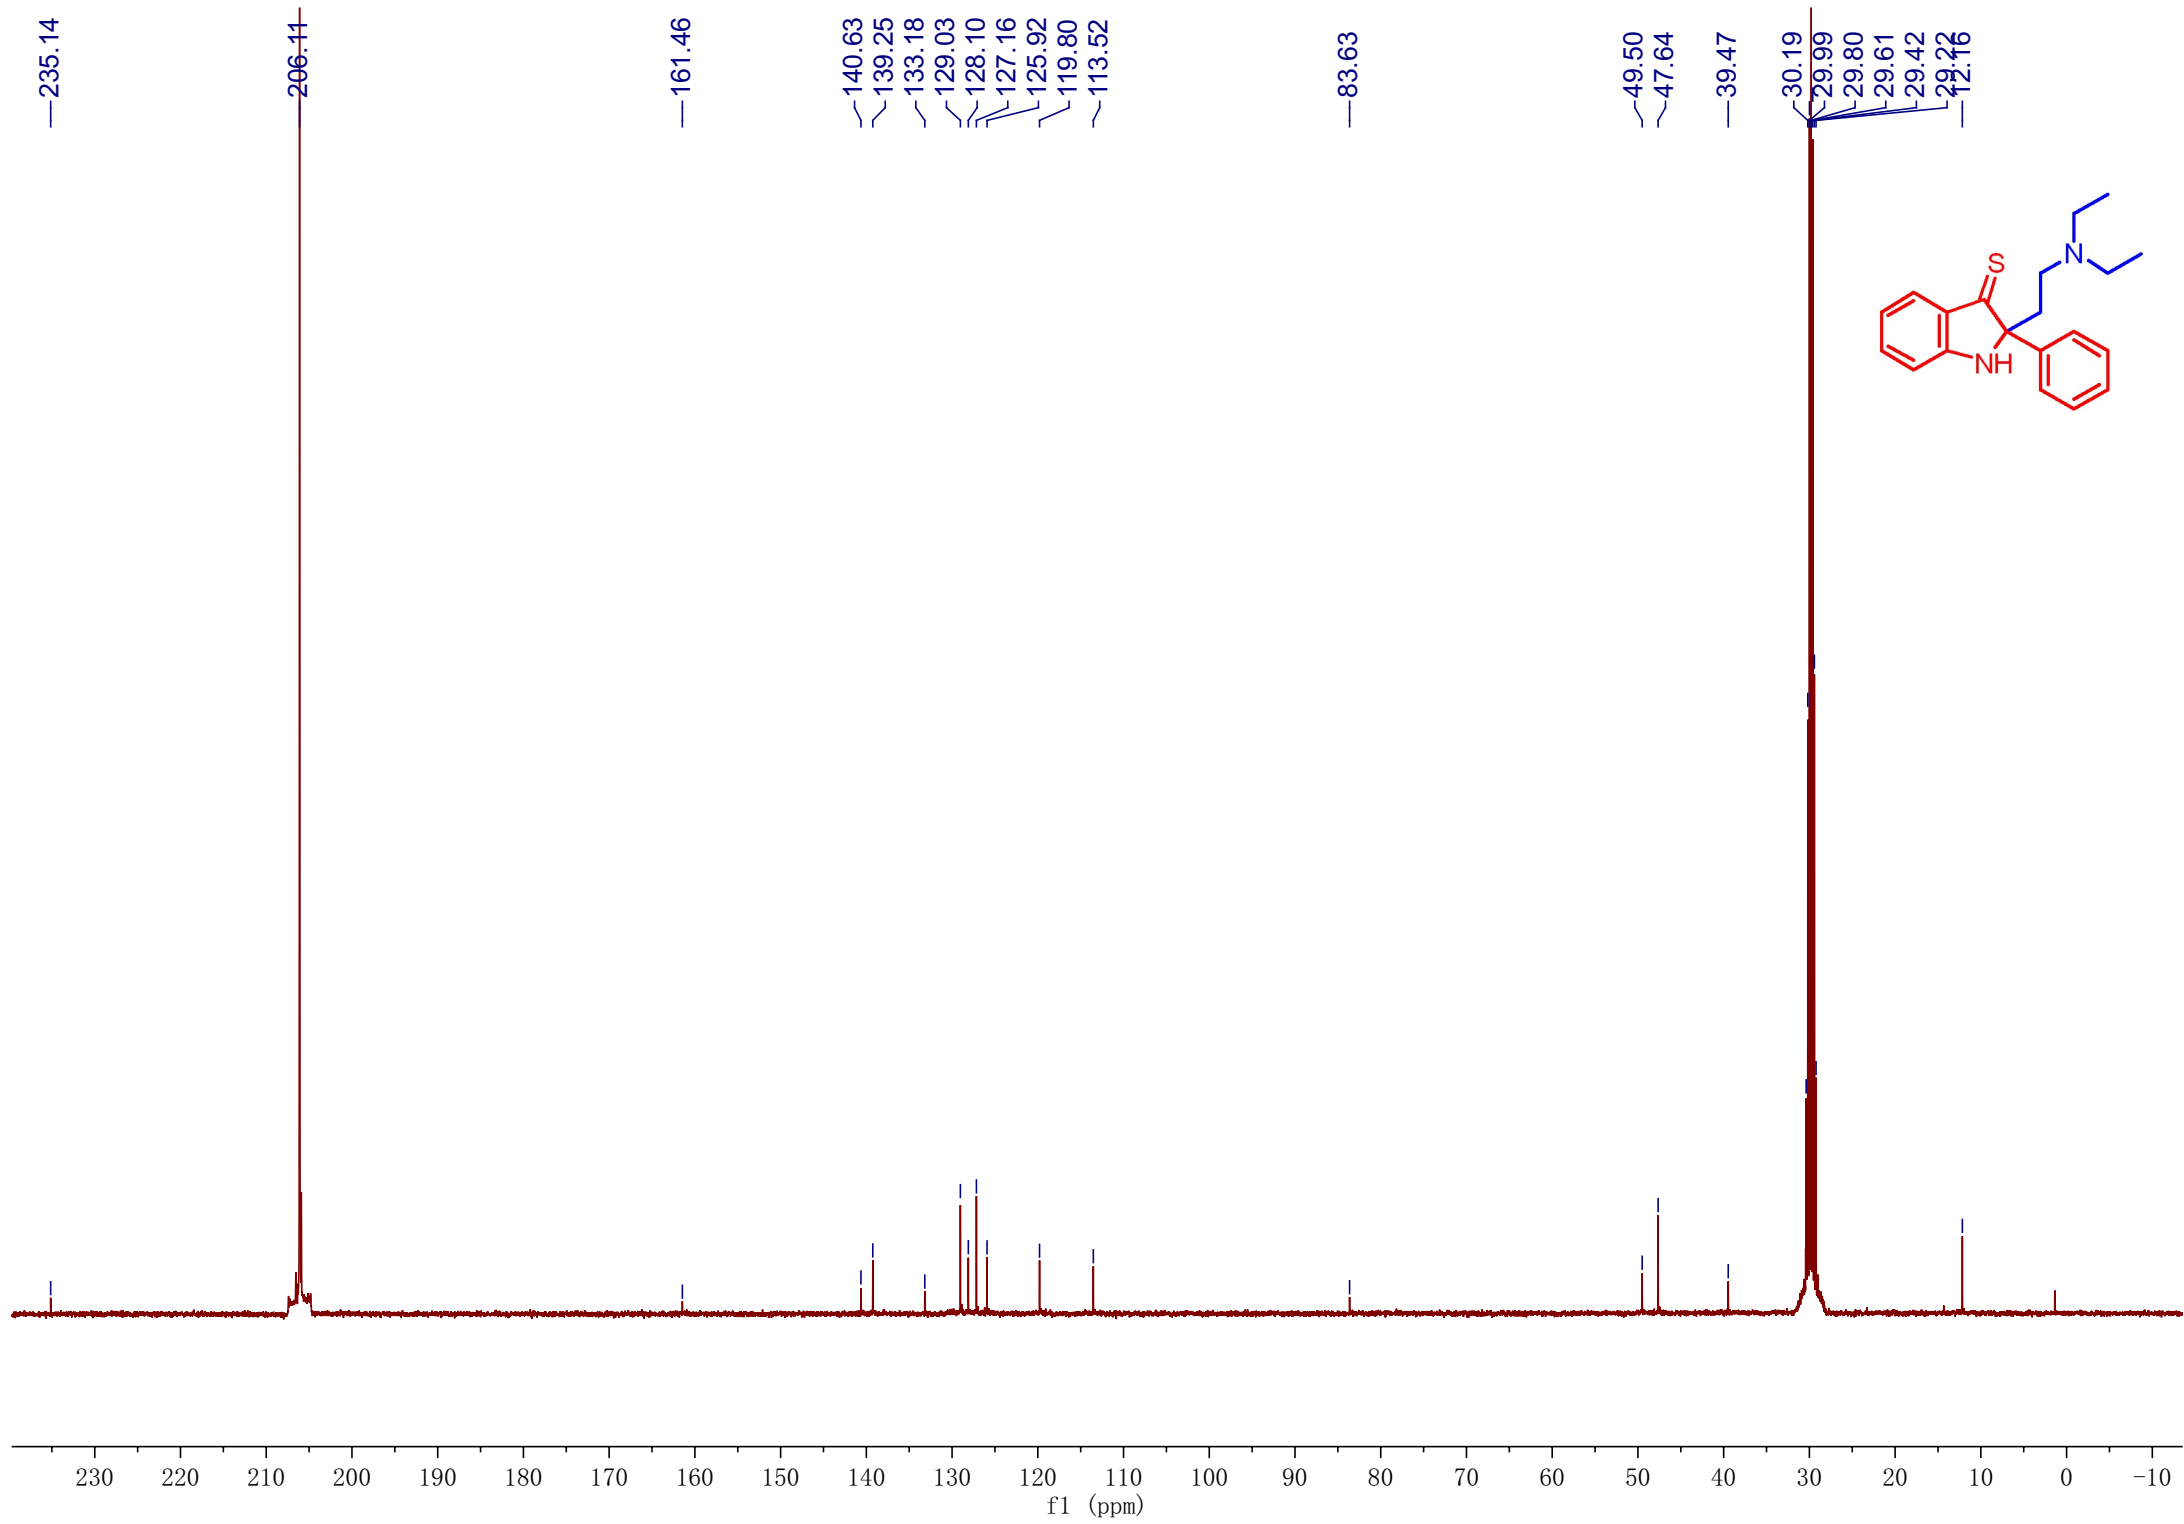

Supplement: d3ob00481c1.pdf [file d3ob00481c1.pdf]
